# Supplementary material
Source: PubMed Central journal article supplement (PMC3376179)
Supplement: NIHMS359472-supplement-1_si_001.pdf [file NIHMS359472-supplement-1_si_001.pdf]

# Structure Prediction of Loops with Fixed and Flexible Stems

A. Subramani and C. A. Floudas

Department of Chemical and Biological Engineering,

Princeton University,

Princeton, NJ 08544-5263, U.S.A.

February 2, 2012

## SUPPLEMENTARY MATERIAL

## 1 Detailed Loop Results

| Protein | Loop Sequence        | SS 1   | SS 2   | Lowest RMSD   |            |
|---------|----------------------|--------|--------|---------------|------------|
|         |                      |        |        | Flexible Stem | Fixed Stem |
| 1lwb    | LASFTQTSASS          | Helix  | Helix  | 0.75          | 0.477      |
| 1nn5    | LEGVDRAGKST          | Strand | Helix  | 1.54          | 0.984      |
| 1gvp    | CYVDLGNEYPVLV        | Strand | Strand | 0.75          | 0.571      |
| 1ql0    | ASLAGVSDWESLNYLSNITP | Helix  | Strand | 3.54          | 2.99       |
| 1jeo    | SYFVGETTTPSYEKDDLLI  | Strand | Strand | 2.65          | 2.21       |
| 1ppr    | AIGSIDATGVTSAAD      | Helix  | Helix  | 2.29          | 1.78       |
| 1d3v    | YLLGRKKRPIHL         | Helix  | Strand | 1.38          | 0.926      |
| 1h2w    | NIDFTDPEESKWKVL      | Strand | Strand | 1.53          | 1.29       |
| 1sfp    | YLQLNCNKESL          | Strand | Strand | 1.53          | 1.01       |
| 1h2w    | KVCDPYAWLEDPDSEQT    | Strand | Helix  | 2.01          | 1.71       |
| 1a34    | GYRIPTNLRQNTVAADNVC  | Strand | Strand | 2.64          | 2.37       |
| 7paz    | LVKCTIHYAMGMIAL      | Strand | Strand | 2.18          | 1.71       |
| 1ooh    | RLRVGDFNFPPSQDL      | Helix  | Helix  | 1.77          | 1.2        |
| 1iof    | KIGKGQVPPSMCYEM      | Helix  | Helix  | 1.62          | 1.25       |
| 1kr4    | LLEKRLIACFN          | Helix  | Strand | 0.91          | 0.552      |
| 1dqi    | FLPEGENFVYQV         | Strand | Strand | 1.47          | 0.958      |
| 1m40    | LLTGELLTLAS          | Helix  | Helix  | 1.31          | 0.811      |
| 1mfg    | TRVQPEGPASKLLQPGDKII | Strand | Strand | 2.87          | 2.21       |
| 1orn    | DELMKLPGVGRKT        | Helix  | Helix  | 1.23          | 0.984      |
| 1d8i    | IYSIAPELRSFIEL       | Helix  | Strand | 1.51          | 1.115      |
| 1ls1    | ALGKQVLESLTPAE       | Helix  | Helix  | 1.84          | 1.33       |
| 1lj8    | DLAHPSSPKTVFG        | Helix  | Helix  | 0.83          | 0.634      |
| 1c7g    | KEQEAGYENVSIKD       | Helix  | Helix  | 1.23          | 0.957      |

|      |                   |        |        |       |       |
|------|-------------------|--------|--------|-------|-------|
| 1o08 | AHAVGVAPSESIG     | Helix  | Strand | 0.937 | 0.768 |
| 1iof | RVLPVVFGKAK       | Strand | Helix  | 0.57  | 0.301 |
| 1ooh | LAQLPHLVPPEM      | Helix  | Helix  | 1.06  | 0.682 |
| 1kng | FVVGREGTIVY       | Strand | Strand | 0.78  | 0.491 |
| 1nn5 | LLRFPERSTEIG      | Strand | Helix  | 1.86  | 1.17  |
| 1k5n | CDVGPDRLLR        | Strand | Strand | 0.84  | 0.51  |
| 1oaf | LKAEFPILSYAD      | Helix  | Helix  | 1.17  | 0.798 |
| 1i8o | SGEAGLVWTADN      | Helix  | Helix  | 0.88  | 0.55  |
| 1jfb | TLLGVPFNDLEY      | Helix  | Helix  | 0.75  | 0.483 |
| 1fp2 | KWIYEEDLTLFG      | Helix  | Helix  | 0.97  | 0.631 |
| 1j22 | VTVDFGVPIIF       | Helix  | Strand | 0.81  | 0.391 |
| 1o3u | GELSSRFEIPEEL     | Helix  | Helix  | 1.24  | 0.975 |
| 1oaf | DVFGKAMGLTDQD     | Helix  | Helix  | 1.048 | 0.84  |
| 1oaa | QLARLLSPGSVML     | Helix  | Strand | 1.23  | 1.006 |
| 1oaf | AELAHSANNGLDI     | Helix  | Helix  | 1.59  | 1.24  |
| 1qqh | ELWNTEPTHCFKK     | Helix  | Strand | 1.44  | 1.13  |
| 1jub | KEVFTFFTKPLGV     | Helix  | Strand | 1.72  | 1.35  |
| 1taf | LKELNVQEYEPVV     | Helix  | Helix  | 1.43  | 1.132 |
| 1cpm | FFPEPFNSYNSGTWEK  | Strand | Strand | 1.74  | 1.48  |
| 1j9b | MLQHPILINRPIVV    | Helix  | Strand | 1.43  | 1     |
| 1c7k | AQTDGHGRGYI       | Strand | Strand | 1.22  | 0.805 |
| 1dqg | FRWVSDSQIMS       | Strand | Strand | 1.39  | 0.928 |
| 1gkl | ESKYSTYAESTTPQG   | Helix  | Helix  | 1.43  | 1.19  |
| 1fdr | HAARYAADLSYLPL    | Strand | Helix  | 2.07  | 1.52  |
| 1o7q | QVFQDKFGVETLGESVA | Strand | Strand | 2.59  | 2.18  |
| 11oi | EAEKMTTVQA        | Helix  | Helix  | 0.895 | 0.572 |

|      |                      |        |        |       |       |
|------|----------------------|--------|--------|-------|-------|
| 1o2d | EKRGNIIDLLGKRAL      | Helix  | Strand | 2.34  | 1.95  |
| 1vcc | LQHVKIPTHLTDV        | Helix  | Strand | 1.61  | 1.28  |
| 1dj0 | IKANAFVHHMVR         | Strand | Helix  | 1.59  | 1.04  |
| 1i24 | LYVGDICDFEF          | Strand | Helix  | 1.54  | 1.05  |
| 1mol | SEDYKTRGRKL          | Strand | Strand | 1.36  | 0.895 |
| 1hbk | QSTIGNCNIKEPSAHKYID  | Helix  | Helix  | 2.33  | 2.06  |
| 1qwn | SLRVGNNGPTLA         | Strand | Strand | 1.01  | 0.646 |
| 1fo6 | ILVDKSGKIVG          | Strand | Strand | 0.642 | 0.429 |
| 1ga6 | TIQTGSSNGDYSDDQQG    | Strand | Helix  | 2.42  | 1.96  |
| 1ojr | KRFGVTPLASA          | Helix  | Helix  | 1.2   | 0.793 |
| 1ayo | IYLDKVTNETLTL        | Strand | Strand | 1.68  | 1.35  |
| 1k3i | SGSWFADSTTKYS        | Strand | Strand | 1.5   | 1.2   |
| 1uhn | DLFDTKHNGILGFEE      | Helix  | Helix  | 1.76  | 1.46  |
| 1b65 | AETYDGALNDINGFPVTEAD | Strand | Helix  | 3.24  | 2.98  |
| 1hqk | VLIRGATPHFD          | Strand | Helix  | 1.23  | 0.798 |
| 2mjp | FIPEEEERTFAEMTTEE    | Strand | Helix  | 2.48  | 2.02  |
| 1ufy | SAREVPVPGSLPRVIR     | Strand | Strand | 1.65  | 1.37  |
| 1q8c | FSLFFFLPKEAEV        | Helix  | Helix  | 1.54  | 1.2   |
| 1fi2 | LFGSDPPIPTPV         | Helix  | Helix  | 1.53  | 1.03  |
| 1tl2 | YKALPPVSNQDNWLA      | Strand | Helix  | 1.89  | 1.57  |
| 1jg1 | LERAGVKNVHV          | Helix  | Strand | 0.86  | 0.575 |
| 1hzt | VCGHPQLGESNED        | Strand | Helix  | 1.51  | 1.2   |
| 1m0k | SMLLGYGLTMV          | Helix  | Strand | 1.23  | 0.8   |
| 1oe1 | VMRTLTPSHIV          | Helix  | Strand | 1.16  | 0.741 |
| 1dcs | FFLRPNADFTFS         | Strand | Strand | 1.27  | 0.826 |
| 1mj5 | MEAIAMPIEWADFPEQDRDL | Strand | Helix  | 2.55  | 2.37  |

|      |                      |        |        |       |       |
|------|----------------------|--------|--------|-------|-------|
| 1k7c | ADVVTAGDYVI          | Helix  | Strand | 1.5   | 0.985 |
| 3chb | CVWNNKTPRAI          | Strand | Strand | 1.21  | 0.796 |
| 1l7a | AALSDIPKAAV          | Helix  | Strand | 1.43  | 0.94  |
| 1eaj | ISPADNQQVDQVI        | Strand | Strand | 1.6   | 1.25  |
| 1j53 | EFLLDKPTFAE          | Helix  | Helix  | 0.716 | 0.458 |
| 1cpm | HTATANIPSTPGKIM      | Strand | Strand | 1.9   | 1.54  |
| 1h7c | LENEKDLEEAEEY        | Helix  | Helix  | 1.52  | 1.22  |
| 1es9 | RLENGELEHIRPKIVV     | Helix  | Strand | 1.59  | 1.32  |
| 1f8e | SWPLSSPPTVYNSRVE     | Strand | Strand | 2.07  | 1.76  |
| 1mf7 | IGVGDAFRSEKS         | Strand | Helix  | 0.999 | 0.672 |
| 1m2x | VVIDCPWGEDKFKS       | Strand | Helix  | 1.97  | 1.46  |
| 1kt6 | RLLNLDGTCAD          | Strand | Strand | 1.16  | 0.763 |
| 2tnf | AEVNLPKYLDFAESGQVYFG | Strand | Strand | 2.26  | 2.13  |
| 1otk | RLGEWCGHAPELEI       | Helix  | Helix  | 1.36  | 1     |
| 1oqv | VEKLCKGTAPFGV        | Helix  | Strand | 1.6   | 1.23  |
| 1m1s | INRLPGPPKEDK         | Strand | Strand | 1.6   | 1.06  |
| 1ny1 | LKKHRVTGTFF          | Helix  | Strand | 1.41  | 0.929 |
| 1lug | GKAVQQPDGLAV         | Helix  | Strand | 1.24  | 0.796 |
| 1pgs | RFITPYWVGTEKLPRGLEI  | Strand | Strand | 2.53  | 2.29  |
| 1bys | VIDERGNTGRAS         | Strand | Helix  | 1.02  | 0.683 |
| 1qtw | ARTVGFKYLRG          | Helix  | Strand | 1.13  | 0.719 |
| 1fm0 | TEVAADFPTVEA         | Strand | Helix  | 1.44  | 0.969 |
| 1jer | VHIVGDNTGWSVPSSPNFY  | Strand | Helix  | 2.58  | 2.41  |
| 1g61 | CLQTNIGGSSLVGS       | Strand | Helix  | 1.9   | 1.37  |
| 1i24 | TLPYPKQASSFYH        | Strand | Helix  | 1.55  | 1.22  |
| 1h6h | EEKRGFTSHFV          | Strand | Strand | 1.21  | 0.771 |

|      |                    |        |        |       |       |
|------|--------------------|--------|--------|-------|-------|
| 1htw | HFDLYRLADPEELE     | Strand | Helix  | 1.78  | 1.31  |
| 1c5e | TAPGGLSAKAPAMTPLM  | Strand | Strand | 2.4   | 2     |
| 2nlr | NRVGPIQPIGSPV      | Strand | Strand | 1.62  | 1.29  |
| 1iof | YISNSAGLYLCN       | Strand | Helix  | 1.4   | 0.915 |
| 1ltz | VAVPGLIPDDV        | Strand | Helix  | 1.27  | 0.86  |
| 1hkf | RCQYPPTGSLYEKKG    | Strand | Strand | 1.37  | 1.14  |
| 1hju | LQNAGIQPTIVS       | Helix  | Strand | 0.939 | 0.641 |
| 1fo6 | VGQQGPIARAETREQ    | Strand | Helix  | 1.42  | 1.19  |
| 1f86 | FTANDSGPRRYT       | Strand | Strand | 1.35  | 0.921 |
| 1jnr | WACQNIDPQEQPSEA    | Helix  | Strand | 1.86  | 1.57  |
| 1otk | NKLWRFTAELFDADEID  | Helix  | Helix  | 2.45  | 2.02  |
| 1id0 | NKVYQRKGVNIS       | Helix  | Strand | 1.45  | 0.977 |
| 1qlw | VVFGDHIEEFPRWAPR   | Strand | Helix  | 1.9   | 1.58  |
| 1agq | HLNVTDLGLGYETKEELI | Strand | Strand | 2.21  | 2.03  |
| 1qq5 | EVLGVTPAEVLF       | Helix  | Strand | 1.14  | 0.766 |
| 1kd0 | VQIKTPDLGGVNNI     | Strand | Helix  | 1.75  | 1.23  |
| 1o08 | VIVPDTSHYTLEF      | Strand | Helix  | 1.82  | 1.44  |
| 1ofz | IGEAKLFSPLAAV      | Strand | Strand | 2.07  | 1.64  |
| 1el6 | IISESKPGYGTWNL     | Strand | Strand | 1.86  | 1.36  |
| 1o26 | NLRADSHAQWEI       | Helix  | Helix  | 0.814 | 0.547 |
| 1jmv | VAVDLSEESPI        | Strand | Helix  | 0.983 | 0.657 |
| 1gyc | TLPATALAPGAPHPFH   | Strand | Strand | 2.08  | 1.73  |
| 1kte | NSKIQPGKVVV        | Helix  | Strand | 0.913 | 0.583 |
| 1od3 | VRLGSPSGTLLG       | Strand | Strand | 1.28  | 0.835 |
| 1kqr | VVKTTQNGSYSQY      | Strand | Strand | 1.55  | 1.24  |
| 1n7o | QRKLESSNPYKVY      | Strand | Strand | 1.53  | 1.18  |

|      |                      |        |        |       |       |
|------|----------------------|--------|--------|-------|-------|
| 1ayl | KILDPRNTYASPEQ       | Helix  | Helix  | 1.25  | 0.877 |
| 1iuj | LRPKNPGDPYVV         | Strand | Strand | 1.29  | 0.827 |
| 1nof | AESLGFNPALTPV        | Strand | Helix  | 1.17  | 0.836 |
| 1e6b | DEKYPEPPLLPRDLHK     | Helix  | Helix  | 1.92  | 1.56  |
| 1ks8 | SIVFRNVDGTY          | Helix  | Helix  | 0.921 | 0.625 |
| 1ig3 | DVLGFGTLVSTS         | Strand | Strand | 1.13  | 0.74  |
| 1id2 | DYFCTPHPFMRGK        | Strand | Strand | 1.37  | 1.05  |
| 1o97 | RRELEGGMLQE          | Strand | Strand | 0.574 | 0.372 |
| 1p1m | RGLVDSNGDDGGRLE      | Strand | Helix  | 1.35  | 1.13  |
| 1lkf | NINSGFVKPNPNDYDFSK   | Strand | Strand | 2.26  | 2.07  |
| 1h2w | VHKKGIKLDGSHPAFL     | Strand | Strand | 2.03  | 1.73  |
| 1ufy | LWNTDTPQDRVRHVYL     | Strand | Strand | 2.15  | 1.81  |
| 1muw | AFIERLERPELYGV       | Helix  | Strand | 1.93  | 1.35  |
| 1gyx | LQQIQPESWQA          | Strand | Helix  | 0.857 | 0.556 |
| 1dvk | WKASLEAYHPEL         | Helix  | Helix  | 1.51  | 0.997 |
| 1dl2 | RLALAFLLSTQTGIPYSSIN | Helix  | Strand | 2.37  | 2.13  |
| 1sfp | YIREPEHPASFYEVL      | Strand | Strand | 1.57  | 1.31  |
| 1qw9 | WCLGNAMDGPWQIGHKTAVE | Strand | Helix  | 2.45  | 2.36  |
| 1ufy | ARQIGMHRVPLLS        | Helix  | Strand | 1.29  | 1.01  |
| 1izm | GLAQPELAKEKGEI       | Helix  | Helix  | 1.8   | 1.3   |
| 1mk4 | IRTITSSDYEM          | Strand | Helix  | 1.2   | 0.788 |
| 1e1a | VRHMNDGRPYQ          | Strand | Strand | 0.887 | 0.593 |
| 1kp6 | ATAAGCGDHLSKSY       | Helix  | Strand | 1.42  | 1.18  |
| 1m2x | VVAGHDDWKDQRSIQ      | Strand | Helix  | 2.25  | 1.85  |
| 1ix9 | GLDVWEHAYFLK         | Strand | Helix  | 0.908 | 0.592 |
| 1mrj | SFRLSGATSSS          | Strand | Helix  | 1.07  | 0.707 |

|      |                      |        |        |       |       |
|------|----------------------|--------|--------|-------|-------|
| 1mwp | MHMNVQNGKWDS         | Strand | Strand | 1.35  | 0.87  |
| 1qj4 | FLEALPPGEKVIL        | Helix  | Strand | 1.28  | 1.03  |
| 1mrj | VLINAQNQRVT          | Strand | Strand | 1.15  | 0.735 |
| 1ie9 | FAKMIPGFRDLTSED      | Helix  | Helix  | 1.32  | 1.09  |
| 1es5 | YTKAADTRRSTGSTTKIM   | Strand | Helix  | 2.76  | 2.47  |
| 1m1n | VMLYIGGLRPR          | Strand | Helix  | 1.35  | 0.865 |
| 1jtv | LVCNAGLGLLGPLEALGEDA | Strand | Helix  | 2.2   | 2.07  |
| 1xer | VNVCPVAAIDV          | Helix  | Strand | 0.939 | 0.637 |
| 1o9g | AVLAGSAPDVVL         | Helix  | Strand | 1.84  | 1.24  |
| 1h32 | QALEMDDFENSGMV       | Helix  | Helix  | 1.73  | 1.28  |
| 1qks | SVWNGKDQESALV        | Strand | Strand | 1.54  | 1.2   |
| 1mk4 | GFQSQSDPETAY         | Strand | Strand | 1.28  | 0.872 |
| 1ogo | MDFNGNSGISS          | Strand | Strand | 1.28  | 0.841 |
| 1lyc | LQTNFYQGSKCESPV      | Helix  | Helix  | 2.25  | 1.87  |
| 1uke | LVDGFPRNEEN          | Strand | Helix  | 0.965 | 0.645 |
| 1o7j | VAGDKQSRGRGVMVV      | Helix  | Strand | 1.76  | 1.5   |
| 1ig3 | GLIPVGQPCNQ          | Strand | Strand | 1.04  | 0.695 |
| 1lli | ALFNGINALNAYN        | Helix  | Helix  | 1.62  | 1.25  |
| 1p4c | VLTTDVAVNGYRERD      | Strand | Helix  | 2.18  | 1.82  |
| 1nls | TFLIKSPDHPADGIA      | Strand | Strand | 1.3   | 1.11  |
| 1qtw | LILETINPDIWAE        | Strand | Helix  | 1.6   | 1.26  |
| 1fj2 | IFLHGLGDTGHG         | Strand | Helix  | 1.06  | 0.724 |
| 1jg1 | VILGDGSKGFPPKAPYDV   | Strand | Strand | 2.56  | 2.26  |
| 1r3f | ICLGEATKFSQYL        | Strand | Helix  | 1.4   | 1.13  |
| 1dfm | VEVQFSNYPFL          | Strand | Helix  | 1.35  | 0.901 |
| 1byi | VTGTDTEVGKTV         | Strand | Helix  | 1.54  | 1.02  |



|      |                      |        |        |       |       |
|------|----------------------|--------|--------|-------|-------|
| 1iab | HAIGFYHEHTRMDRDNYVTI | Helix  | Strand | 2.83  | 2.69  |
| 1ear | RKETENGTDIA          | Strand | Strand | 0.82  | 0.557 |
| 1ayl | AILNGSLDNAETFT       | Helix  | Strand | 1.97  | 1.41  |
| 1kd0 | AYCGGTCNETNRS        | Strand | Helix  | 2.1   | 1.62  |
| 1p35 | AYVDSVQFDGEQ         | Strand | Helix  | 1.71  | 1.1   |
| 1qq5 | VANAGLTDSFDAVI       | Helix  | Strand | 1.78  | 1.25  |
| 1dci | KISKSDCRAVV          | Helix  | Strand | 1.21  | 0.793 |
| 1cpm | DWLGSYNGANPLYA       | Helix  | Strand | 1.92  | 1.43  |
| 1dqt | EYSPSHNTDEVR         | Strand | Strand | 1.52  | 0.974 |
| 1ecs | ALVDPDGTLR           | Strand | Strand | 0.561 | 0.364 |
| 1lu4 | WARYNVPWQPAFV        | Helix  | Strand | 1.47  | 1.19  |
| 1o0i | ANHLRPVRSRKVT        | Strand | Strand | 1.58  | 1.22  |
| 1k3i | FYKQNPNSIVRVYHSIS    | Strand | Strand | 2.61  | 2.19  |
| 1gpp | KVMGKDGRPRE          | Strand | Strand | 0.536 | 0.364 |
| 1aox | EIKAIASIPTR          | Helix  | Helix  | 0.573 | 0.385 |
| 1tl2 | YQGTYPQNKNDNWLA      | Strand | Helix  | 1.88  | 1.58  |
| 1aly | VNVTDPSQVSHGTGFTSFG  | Strand | Strand | 2.55  | 2.21  |
| 1kwf | KLWGSSGAINYGQ        | Helix  | Helix  | 1.33  | 1.03  |
| 3tss | KDSPLKYWPKFDK        | Strand | Strand | 1.66  | 1.34  |
| 1egw | IIFNSSNKLQ           | Strand | Strand | 0.513 | 0.343 |
| 1fdr | RLAALKPGDEVQ         | Helix  | Strand | 0.739 | 0.497 |
| 1hdk | VESKNMPFQDGQEFEL     | Strand | Strand | 2.01  | 1.68  |
| 1mvl | IIRAWDYTKPLFV        | Helix  | Strand | 0.995 | 0.786 |
| 3ezm | TCERTNGGYNT          | Strand | Strand | 1.03  | 0.689 |
| 1jf8 | KEHWGFDDPAGKEWSE     | Strand | Helix  | 1.78  | 1.5   |
| 1fdr | LRLGKDLDRFKNLV       | Helix  | Strand | 1.74  | 1.26  |

|      |                       |        |        |       |       |
|------|-----------------------|--------|--------|-------|-------|
| 1cmb | QVNNLRHATNSE          | Helix  | Helix  | 1.77  | 1.21  |
| 1onw | CAISDHRSAAPDVYH       | Strand | Helix  | 2.13  | 1.75  |
| 1gvp | FKVGQFGSLMI           | Strand | Strand | 0.59  | 0.401 |
| 1n7o | HKHVYNSEKSIVGNWWD     | Helix  | Helix  | 2.28  | 1.92  |
| 3mag | VYIGSAPGTHI           | Strand | Helix  | 1.62  | 1.03  |
| 1yac | IARPGNINAWDNEF        | Strand | Helix  | 1.8   | 1.52  |
| 1jig | HWYVTGPHFFT           | Helix  | Helix  | 1.66  | 1.06  |
| 1mla | ALPLPVSVPSHCALMKPA    | Strand | Helix  | 2.47  | 2.21  |
| 2pth | IVGLANPGA EYAATRHNAGA | Strand | Helix  | 2.83  | 2.7   |
| 1n7o | WPTVNPYKMPGT TET      | Helix  | Strand | 1.74  | 1.43  |
| 1qv1 | DFLDINGNGKITLDE       | Helix  | Helix  | 1.75  | 1.5   |
| 1el6 | ITNKTGV SPEGVSQTDY    | Strand | Strand | 2.65  | 2.25  |
| 1m1n | DYDRTMKEMGDSTLLY      | Helix  | Strand | 1.71  | 1.39  |
| 1kv7 | QDKKFSADGQIDYQLDVMT   | Strand | Helix  | 3.12  | 2.71  |
| 1gvp | SGVSRQGKPY S          | Strand | Strand | 0.636 | 0.425 |
| 1i3j | EKMKGKKPSNIKKISC      | Helix  | Strand | 2.18  | 1.85  |
| 1od3 | AIGYIENGYSTT          | Strand | Strand | 1.62  | 1.07  |
| 1f9v | TMLNPGDGIIP           | Helix  | Helix  | 1.3   | 0.871 |
| 1nvj | VVGPQPFSVGE           | Strand | Helix  | 1.23  | 0.786 |
| 3sil | DARHNTASDQSFIDT       | Strand | Strand | 1.72  | 1.45  |
| 1ogo | VSLAGTNNFHDS          | Strand | Strand | 1.04  | 0.689 |
| 1r5l | HLINEPVIFHAV          | Strand | Helix  | 1.1   | 0.739 |
| 1bx4 | YEQNEQPTGTCA          | Strand | Strand | 1.27  | 0.816 |
| 1h4a | RLIPHSGSHRIR          | Strand | Strand | 1.5   | 0.981 |
| 1d5t | AIYGGTYMLNKPVDDII     | Helix  | Strand | 2.12  | 1.8   |
| 1mvl | WSSWNKIGDPVLHI        | Helix  | Helix  | 1.7   | 1.25  |

|      |                     |        |        |       |       |
|------|---------------------|--------|--------|-------|-------|
| 1h2w | YHVLGTDQSEDILC      | Strand | Strand | 1.59  | 1.18  |
| 1eaz | VIPLKEVHKVQ         | Strand | Strand | 1.65  | 1.06  |
| 1ak0 | GWIKGDNISEPIT       | Helix  | Helix  | 1.77  | 1.4   |
| 1b9w | CYRYLDGTEEW         | Strand | Strand | 0.37  | 0.24  |
| 1d5t | YEPIDDGSESQVFC      | Strand | Strand | 1.61  | 1.16  |
| 1gci | VLDTGISTHPDLNIRG    | Strand | Strand | 2.22  | 1.83  |
| 1fqi | DLKYGDQSKVKE        | Helix  | Helix  | 0.925 | 0.604 |
| 1k4i | CRLAGKRPAVI         | Helix  | Strand | 1.66  | 1.14  |
| 1lk9 | RMRPPSPSYAW         | Strand | Strand | 1.07  | 0.714 |
| 1iab | FVPRTTESDYVE        | Strand | Strand | 1.38  | 0.888 |
| 1jg1 | IIVTAGAPKIPEPL      | Strand | Helix  | 1.72  | 1.23  |
| 1noz | RYIDENGKERT         | Strand | Strand | 1.23  | 0.837 |
| 1m4l | LLYPYGYTTQSIPDKTE   | Strand | Helix  | 2.37  | 1.95  |
| 1g2b | LLNSTNKDWWK         | Strand | Strand | 1.34  | 0.91  |
| 1dqz | VFNFPPNGTHSWPY      | Strand | Helix  | 1.64  | 1.17  |
| 1ayl | AIPTELPGVDTKI       | Strand | Helix  | 1.52  | 1.21  |
| 1bkr | QHLGLTKLLDPED       | Helix  | Helix  | 1.58  | 1.25  |
| 1fg7 | GISDKLDGVKV         | Helix  | Strand | 1.67  | 1.14  |
| 1pq7 | IRAGSLSRTSGGITS     | Strand | Strand | 1.59  | 1.31  |
| 1e42 | FQIKECHLNADT        | Strand | Helix  | 1.32  | 0.85  |
| 3tss | RIKNTDGSISL         | Strand | Strand | 0.584 | 0.39  |
| 1qq5 | ALRMREETYAEAPDFVV   | Helix  | Strand | 2.47  | 2.1   |
| 1hyo | FFVGPGNRFGEPIPIISK  | Strand | Helix  | 2.61  | 2.19  |
| 1cif | IKKNVLWDENN         | Helix  | Helix  | 1.07  | 0.729 |
| 3sil | MVRTKNITTVLNT       | Strand | Strand | 1.46  | 1.17  |
| 1cnv | ELPASQATAPGGGYIPPSA | Strand | Helix  | 2.65  | 2.37  |

|      |                     |        |        |       |       |
|------|---------------------|--------|--------|-------|-------|
| 1bgf | EQVDQFYDDNFPMEI     | Helix  | Helix  | 1.91  | 1.55  |
| 1kwa | HRQGTLLHVGDEIR      | Helix  | Strand | 1.52  | 1.2   |
| 1am2 | VIQRSAFSTVGVPLVR    | Strand | Helix  | 3.44  | 2.93  |
| 1k92 | VALNGKTFSDDE        | Strand | Helix  | 1.83  | 1.49  |
| 1ozn | EALAPLRALQYLR       | Helix  | Strand | 1.62  | 1.26  |
| 1ff0 | LHTNDEC VATY        | Strand | Strand | 0.7   | 0.468 |
| 1gxu | RGKVQGVGFRP         | Strand | Helix  | 1.31  | 0.865 |
| 1o4t | VVRSEITPERI         | Strand | Strand | 1.21  | 0.78  |
| 1m15 | LQEASDCKSLLK        | Helix  | Helix  | 0.799 | 0.529 |
| 1ff0 | VVSGLVNHVPLEQMQRMV  | Strand | Strand | 2.8   | 2.54  |
| 4eug | ENTIPGFTRPNHGYLESW  | Helix  | Helix  | 2.24  | 2.06  |
| 1nls | TAKWNMQNGKVG T      | Strand | Strand | 1.52  | 1.2   |
| 1ogo | SIIPAASGLTMGL       | Strand | Strand | 1.61  | 1.27  |
| 1jl7 | AVFGFSGASDPGV       | Helix  | Helix  | 1.27  | 0.988 |
| 1hh8 | AFSAVQDPHSRI        | Helix  | Helix  | 0.88  | 0.583 |
| 1gxy | AVREFKENPGQFH YKAF  | Helix  | Helix  | 2.22  | 1.89  |
| 1a8e | CLKDGAGD VAF        | Helix  | Strand | 1.03  | 0.686 |
| 1r3f | QRTDTS DADGQIVE     | Strand | Strand | 1.88  | 1.34  |
| 2cpo | ANHGYIPHDGRAI       | Helix  | Strand | 1.93  | 1.57  |
| 1jks | NVSAVNYEF EDEY      | Helix  | Helix  | 0.99  | 0.792 |
| 1mml | LPVKKPGTNDYRPV      | Strand | Strand | 1.84  | 1.33  |
| 1h2w | FYP SKDGTKIP        | Strand | Strand | 0.758 | 0.492 |
| 1am2 | LVALPEGESVR         | Strand | Strand | 0.786 | 0.51  |
| 1n7o | KEASLTEQE KDY       | Strand | Strand | 1.32  | 0.848 |
| 1a8d | IVHKAMDIEYNDMFNNFTV | Strand | Strand | 2.46  | 2.23  |
| 1ayl | LVNTGWNGTGKRISIKD   | Strand | Helix  | 2.46  | 1.99  |

|      |                     |        |        |       |       |
|------|---------------------|--------|--------|-------|-------|
| 1k5c | EVLNSPAQAISV        | Strand | Strand | 1.3   | 0.851 |
| 1okc | IFLGGVDRHKQFWR      | Helix  | Helix  | 1.79  | 1.31  |
| 1tl2 | YKASPPQSDTDNWIA     | Strand | Helix  | 1.31  | 1.06  |
| 1uke | IDANQGKNFLV         | Helix  | Strand | 1.25  | 0.847 |
| 1is3 | EFPNRNKDAAFN        | Strand | Strand | 1.32  | 0.846 |
| 1oc7 | ANQAGANPQYAA        | Helix  | Strand | 1.32  | 0.873 |
| 1n1d | LILETIRYVDEVI       | Helix  | Strand | 1.47  | 1.17  |
| 1g8a | AVKSRSIDVTKEPEQ     | Strand | Helix  | 1.81  | 1.47  |
| 1moq | IEMPHVEEVIAPI       | Strand | Helix  | 1.52  | 1.2   |
| 1o50 | ILEDPVTRTVY         | Helix  | Strand | 1.33  | 0.876 |
| 1oaf | LLSGEKEGLLQLPSD     | Helix  | Helix  | 1.77  | 1.49  |
| 1pz4 | AIGTGALPAKE         | Helix  | Helix  | 0.595 | 0.404 |
| 2nlr | SFVAPSAISGWS        | Strand | Strand | 1.22  | 0.793 |
| 1lxj | RVGTRTDKHQTAQD      | Strand | Helix  | 2.01  | 1.47  |
| 1ig3 | LYDLTEGERESFLPEFVS  | Helix  | Strand | 1.76  | 1.63  |
| 1i0i | LLDKREGRRVPFSADYVV  | Strand | Strand | 2.17  | 1.92  |
| 1dcs | YSMGTADNLFPSGDF     | Strand | Helix  | 1.86  | 1.53  |
| 1n1p | EQKDTDGKLLA         | Strand | Strand | 0.443 | 0.301 |
| 1qw9 | LVVCGSSNRNMPTFAEWE  | Strand | Helix  | 1.95  | 1.77  |
| 1pfb | WEPEVNILDRRLI       | Strand | Helix  | 1.33  | 1.08  |
| 1d5t | ALASNLMGMFE         | Helix  | Helix  | 0.9   | 0.584 |
| 1o8x | GVDADSGDVVT         | Strand | Strand | 1.35  | 0.905 |
| 1plc | SKISMSEEDLLNAKGETFE | Helix  | Strand | 2.54  | 2.25  |
| 1kqr | MLLAPTAAGVV         | Strand | Strand | 1.41  | 0.914 |
| 1h03 | GIIQGERDHYGYRQSVT   | Strand | Strand | 1.66  | 1.36  |
| 1whi | KDATPGGVVKKGQVVK    | Strand | Strand | 2.17  | 1.83  |

|      |                      |        |        |       |       |
|------|----------------------|--------|--------|-------|-------|
| 1cpm | YTSNQTGGSFEE         | Strand | Strand | 1.5   | 1.01  |
| 1psu | IDFLRPGFAGDTLT       | Strand | Strand | 1.99  | 1.42  |
| 1lok | VFITDYTDSNF          | Strand | Helix  | 1.42  | 0.909 |
| 1cxq | TVDTASSAIVV          | Strand | Strand | 1.02  | 0.663 |
| 1oe1 | KMVIDDKGTTLQ         | Strand | Strand | 1.16  | 0.747 |
| 1kt6 | FTDTEDEPAKFK         | Strand | Strand | 0.703 | 0.477 |
| 1o2d | LKELGLYEKVAVSSEE     | Helix  | Helix  | 2.15  | 1.81  |
| 1mj5 | GWLSESPIPKLF         | Helix  | Strand | 0.852 | 0.582 |
| 1otg | TLAATGIFPLAGIRSR     | Helix  | Strand | 2.04  | 1.66  |
| 1o2d | EIPPTAGTGSEVTPYSI    | Strand | Strand | 2.21  | 1.86  |
| 1qdd | SLTSSTGFQKWKD        | Strand | Strand | 1.75  | 1.4   |
| 1cka | IRDKPEEQWVN          | Strand | Strand | 1.33  | 0.9   |
| 1ji3 | KAHNVSLSPLFEGGHHFVLS | Helix  | Strand | 2.94  | 2.82  |
| 3vub | LASARLLSDKVSRELYPVVH | Strand | Strand | 2.44  | 2.32  |
| 1it6 | KICGDIHGQYYD         | Strand | Helix  | 1.59  | 1.02  |
| 1oc7 | VHTLAIPQITDPAL       | Helix  | Helix  | 1.63  | 1.18  |
| 1m0k | LVKGMGVSDPDA         | Helix  | Helix  | 1.3   | 0.832 |
| 1nyc | RHGDDTSHNQYH         | Strand | Strand | 1.67  | 1.09  |
| 1ny1 | IEKYDAFYLGNTKEKTIY   | Helix  | Strand | 2.43  | 2.15  |
| 1g2q | EIQKNAIPAGSNVI       | Strand | Strand | 1.45  | 1.08  |
| 1b0x | LQAIKMDRYKDN         | Helix  | Helix  | 1.49  | 1.02  |
| 1k92 | TANLGQPDEEDYDAIP     | Strand | Helix  | 1.79  | 1.51  |
| 1hoe | VVYEDDTEGLCYAV       | Strand | Strand | 1.68  | 1.2   |
| 1dvk | YHLQQPKEINL          | Helix  | Helix  | 0.474 | 0.307 |
| 1kxg | IQNMPETLPNNSC        | Strand | Strand | 1.43  | 1.12  |
| 1n1p | TVFVPNVYDFGY         | Strand | Helix  | 1.38  | 0.926 |

|      |                      |        |        |       |       |
|------|----------------------|--------|--------|-------|-------|
| 2ebo | HILGPDCAIEPHDWTKN    | Helix  | Helix  | 2.36  | 1.96  |
| 1mpx | KLSFQPPVAGQAGFEE     | Strand | Strand | 2.31  | 1.92  |
| 1fo6 | ELREHIFNFKA          | Helix  | Helix  | 1.19  | 0.808 |
| 1pgs | IYTETWLAKGREY        | Strand | Strand | 1.51  | 1.16  |
| 1k3i | SATMSDGRVFT          | Strand | Strand | 0.306 | 0.198 |
| 1ubk | FDAGEFAPSFEESEA      | Helix  | Helix  | 1.51  | 1.26  |
| 1jf8 | SAGIETHGVNPKA        | Strand | Helix  | 1.75  | 1.36  |
| 1mf7 | VITDGEKFGDPLGYEDVIPE | Strand | Helix  | 3.22  | 2.97  |
| 1dj0 | ENDFTSFRAVQCQSRTPWNR | Strand | Strand | 1.93  | 1.8   |
| 1nof | GGMSGVGWINDLTTEQ     | Strand | Helix  | 2.35  | 1.93  |
| 1qks | GGLDGSHRYFI          | Strand | Strand | 1.22  | 0.806 |
| 1okc | LAADVKGKAAQREFTGLGN  | Helix  | Helix  | 2.6   | 2.3   |
| 1qq5 | VISVDAKRVFKPHPDS     | Strand | Helix  | 2.42  | 2.07  |
| 1p4c | LLIGPTGLNGALWPKGDL   | Strand | Helix  | 2.49  | 2.28  |
| 1ako | NGYFPQGSRDHPIKFP     | Strand | Helix  | 2.05  | 1.69  |
| 1mvl | LAASGSVAAIKFGN       | Strand | Helix  | 1.84  | 1.33  |
| 1tl2 | YEDYPPSYAYDNWLA      | Strand | Helix  | 1.41  | 1.2   |
| 1h2w | YAFSEDGEYFA          | Strand | Strand | 0.564 | 0.383 |
| 1kt6 | YWGVASFLQKGND        | Strand | Strand | 1.7   | 1.31  |
| 1iko | LVLYPQIGDKLD         | Strand | Strand | 1.48  | 0.964 |
| 8abp | TEGQGFKAAADIIG       | Helix  | Strand | 1.44  | 1.15  |
| 1kv7 | WFHPHQHGKTGR         | Strand | Helix  | 1.42  | 0.928 |
| 1h03 | VQWSDPLPECR          | Strand | Strand | 1.45  | 0.938 |
| 1koi | YLDLEPDDVPKRYCAA     | Strand | Strand | 2.16  | 1.75  |
| 1dk0 | LSSLQAQGHGCVVH       | Strand | Helix  | 1.9   | 1.33  |
| 1psr | CDKKGTNYLADVFE       | Helix  | Helix  | 1.36  | 0.983 |

|      |                       |        |        |       |       |
|------|-----------------------|--------|--------|-------|-------|
| 1jyo | EKLG LPLTFDDNNQCL     | Helix  | Strand | 2.18  | 1.86  |
| 1at0 | RKPLGELSIGDRVL        | Strand | Strand | 1.5   | 1.1   |
| 1fdr | AYS YVNSPDNPDLEF      | Strand | Strand | 1.65  | 1.38  |
| 1htw | LKLHTEKAIMV           | Helix  | Strand | 1.61  | 1.03  |
| 1hkf | RIYRPSDNSVSK          | Strand | Strand | 1.16  | 0.771 |
| 1dl2 | SKHGWGYDVYVG          | Helix  | Strand | 1.3   | 0.885 |
| 1j9b | TIILYLENPPSRDE        | Strand | Helix  | 1.1   | 0.782 |
| 1f8e | MLKVPNALTD DDKSKPTQGQ | Strand | Strand | 2.08  | 1.8   |
| 1qks | LVDYTDLNNLK           | Strand | Strand | 1.41  | 0.959 |
| 1hz4 | NLLGNGKYHSDW          | Helix  | Helix  | 1.21  | 0.788 |
| 1qlw | WQQMVPDWLGSMPTPNPTV   | Helix  | Helix  | 2.93  | 2.57  |
| 1gd0 | YYDMNAANVGW           | Strand | Strand | 0.981 | 0.666 |
| 1lkk | IRESESTAGSFSL         | Strand | Strand | 1.78  | 1.4   |
| 1fw9 | RFEQQGKTVSV           | Helix  | Strand | 1.3   | 0.844 |
| 1a6q | LICFPNAPKVSPEA        | Strand | Helix  | 1.47  | 1.06  |
| 1mrj | TAAGKIRENIPLGLPA      | Helix  | Helix  | 2.07  | 1.72  |
| 110i | EEFDTEIPDEE           | Helix  | Helix  | 1.36  | 0.921 |
| 112l | YSEELPKEIETIPQ        | Helix  | Helix  | 1.49  | 1.06  |
| 1jo0 | VMLGGNGLTEGV          | Strand | Helix  | 1.62  | 1.09  |
| 1i9s | LVDLTNTSRFYDRNDI      | Strand | Helix  | 2.07  | 1.7   |
| 1gci | AHNRGLTGSGVKVA        | Helix  | Strand | 1.66  | 1.18  |
| 1am2 | WKLIDEIKPGDYAV        | Strand | Strand | 1.58  | 1.16  |
| 1a8d | RIFCKALNPKE           | Strand | Helix  | 1.04  | 0.686 |
| 1it6 | FFLLRGNHECASI         | Strand | Helix  | 0.961 | 0.769 |
| 1mfm | TKTGNAGSRLA           | Helix  | Strand | 1.18  | 0.787 |
| 1lpl | AAKNIMVGNRCE          | Helix  | Strand | 1.41  | 0.959 |



|      |                     |        |        |       |       |
|------|---------------------|--------|--------|-------|-------|
| 1qj4 | VYKVEGGDHLKLQL      | Strand | Helix  | 1.62  | 1.27  |
| 1e42 | LKCRAPEVSQY         | Strand | Helix  | 0.977 | 0.653 |
| 1b5e | LGQNPDSRRGIMI       | Helix  | Strand | 1.36  | 1.1   |
| 1o7q | DKKNDIEAQWHDES      | Helix  | Helix  | 1.99  | 1.48  |
| 1n1p | LWLDVVNRNIDPYAGVLDL | Helix  | Strand | 3.15  | 2.73  |
| 1o1x | ARSHNNANILV         | Helix  | Strand | 1.29  | 0.876 |
| 1lo7 | SRTTPGGDVQL         | Strand | Strand | 0.876 | 0.568 |
| 1kv7 | VEVNDNKPFDL         | Strand | Strand | 1.31  | 0.849 |
| 1gd0 | QATGKPPQYIAVH       | Helix  | Strand | 1.07  | 0.828 |
| 1odz | GWDTLSIVAPKAEGDIVAQ | Strand | Helix  | 2.13  | 1.89  |
| 1a8d | ISDISGFNSSVI        | Strand | Strand | 1.24  | 0.797 |
| 1j53 | HVYLKPDRLVDPEA      | Strand | Helix  | 1.53  | 1.11  |
| 1ew2 | LISNMDIDVIL         | Helix  | Strand | 1.19  | 0.807 |
| 1h2c | VNRLGPGIPDHPLRL     | Strand | Helix  | 2.37  | 2.02  |
| 1k3x | RLLSPRFRNRQFAG      | Helix  | Helix  | 1.73  | 1.25  |
| 1nof | IQATENPQSNVHL       | Strand | Strand | 1.61  | 1.31  |
| 1f32 | WTMLEGDDIQV         | Strand | Helix  | 1.48  | 0.947 |
| 1fvk | NVKKKLPEGVKMTK      | Helix  | Strand | 1.74  | 1.26  |
| 1a8d | LIPVASSKDV          | Strand | Strand | 1.07  | 0.686 |
| 1ngn | RIFCVNEWKQVHPEDHKL  | Helix  | Helix  | 1.99  | 1.79  |
| 1l2l | NLLGGVYGIPVIA       | Helix  | Strand | 1.29  | 1.02  |
| 1jtv | VLITGCSSGIG         | Strand | Helix  | 1.15  | 0.736 |
| 1i1w | WRAAGVPIDGIG        | Helix  | Strand | 0.908 | 0.619 |
| 1pa9 | IACQYPLQSQLES       | Strand | Helix  | 1.48  | 1.16  |
| 1ie9 | ICIVSPDRPGVQDAAL    | Helix  | Helix  | 1.6   | 1.32  |
| 1ny1 | FDNGYENGYTPK        | Strand | Helix  | 1.68  | 1.08  |

|      |                      |        |        |       |       |
|------|----------------------|--------|--------|-------|-------|
| 1o9g | ASALPAHAVIA          | Helix  | Strand | 0.74  | 0.502 |
| 1k5n | IALNEDLSSWTA         | Strand | Strand | 1.18  | 0.772 |
| 1n7o | FLESSDSKKNIGY        | Strand | Strand | 1.36  | 1.09  |
| 1n1p | EEILPRVDSSE          | Helix  | Helix  | 0.951 | 0.617 |
| 1gxm | NNARTKWSASRADV       | Helix  | Helix  | 1.62  | 1.21  |
| 1pa9 | IREAGQKTISV          | Strand | Strand | 1.12  | 0.757 |
| 1odm | KIDVSPFLFGDDQAA      | Strand | Helix  | 1.64  | 1.15  |
| 1hoe | VGDGYIGSHGHARY       | Strand | Strand | 2.01  | 1.42  |
| 1tl2 | YKGTPTDNDNWMG        | Strand | Helix  | 1.52  | 1.25  |
| 1dos | FIAGKGVKSDVPQGAA     | Helix  | Helix  | 2.26  | 1.85  |
| 1iko | DIICPKVDSKTVGQYEYYKV | Strand | Strand | 2.53  | 2.34  |
| 1gd0 | LHSIGKIGGAQ          | Strand | Helix  | 0.802 | 0.512 |
| 1pin | KRMSRSSGRVYY         | Strand | Strand | 1.34  | 0.864 |
| 1g8a | TVIDDDGSERIA         | Strand | Strand | 1.38  | 0.942 |
| 1qq5 | LGTLGLEPDESF         | Helix  | Helix  | 1.3   | 0.887 |
| 1fvk | KYHVNFMGGDL          | Strand | Helix  | 1.32  | 0.896 |
| 1vie | GWYCTNLTPEGYA        | Strand | Strand | 1.42  | 1.13  |
| 1jmk | TIMNQDQEQII          | Strand | Strand | 1.53  | 1.04  |
| 1hx0 | TLQTGLPGGTY          | Strand | Strand | 1.2   | 0.775 |
| 1lmi | LKSSTAVIPGYPVAGQVW   | Strand | Strand | 1.95  | 1.77  |
| 1d8i | ISEVTENTGKFSI        | Helix  | Strand | 1.42  | 1.13  |
| 1ctj | IENGKGAMPAWDGRLDEDE  | Helix  | Helix  | 2.5   | 2.19  |
| 1hdk | GRPLVCFLNEPYLQ       | Strand | Strand | 1.83  | 1.34  |
| 1khy | ALGHDNQFIEPLH        | Helix  | Helix  | 1.48  | 1.14  |
| 1jub | EILNQFPLTYVN         | Helix  | Strand | 1.21  | 0.813 |
| 1n8k | DFMAKKFALDPLITH      | Helix  | Strand | 1.41  | 1.15  |

|      |                      |        |        |       |       |
|------|----------------------|--------|--------|-------|-------|
| 1mnn | TFETANCDLDT          | Strand | Helix  | 1.07  | 0.723 |
| 1omr | VFRSFDANSDGTLT       | Helix  | Strand | 2.04  | 1.5   |
| 1h2w | LTADHDDRNVPLHS       | Strand | Helix  | 1.66  | 1.22  |
| 1dl2 | KMDHLVCFMGG          | Strand | Helix  | 1.48  | 0.99  |
| 1d3v | IIGAPFSKGQPRGGVEKGPA | Strand | Helix  | 3     | 2.8   |
| 1iib | QRLLPNKPVEV          | Helix  | Strand | 1.03  | 0.677 |
| 1m2d | TPTGCMNASMMGPVVVV    | Strand | Strand | 2.34  | 1.99  |
| 3seb | WYDMMPAPGDKFDQSK     | Strand | Helix  | 1.83  | 1.48  |
| 1ufh | FGLYEPYRGKGYAK       | Strand | Helix  | 1.55  | 1.12  |
| 1gpi | FLTNDNTSTGTLSE       | Strand | Strand | 1.88  | 1.32  |
| 1qqq | LKNPDSRRIIVS         | Helix  | Strand | 1.55  | 1.19  |
| 3mag | FMLRTVYCNKTFPTTKA    | Helix  | Helix  | 1.62  | 1.36  |
| 1l9y | LYYVGTDDLASYLI       | Strand | Strand | 1.13  | 0.82  |
| 1qwn | LHDNPEMKFIW          | Helix  | Strand | 1.44  | 0.965 |
| 1t1d | YFFDRNRPSFDA         | Strand | Helix  | 0.933 | 0.6   |
| 1gyc | FFINNASFTPPTVPVLL    | Strand | Helix  | 2.52  | 2.15  |
| 1lmi | AIRGSVTPAVSQFNA      | Strand | Strand | 2.09  | 1.74  |
| 1qks | LIGTDPEGHPDNAWKILD   | Strand | Strand | 1.9   | 1.7   |
| 1nf9 | ADREVVEELAPGPDDWLL   | Helix  | Strand | 2.46  | 2.2   |
| 1gxr | QLDCLNRDNYIRS        | Strand | Strand | 1.5   | 1.15  |
| 1bbp | VLSRSKVLGTGEA        | Strand | Helix  | 1.62  | 1.07  |
| 1k5c | IVKNQDDCIAI          | Strand | Strand | 1.06  | 0.696 |
| 1kyf | IECISDFTEAPVLN       | Strand | Strand | 1.89  | 1.38  |
| 3mag | LIDGRHHDPIGLNGLRDVTL | Strand | Strand | 2.2   | 1.98  |
| 1jk3 | FSKINTGMADILV        | Strand | Strand | 1.26  | 0.995 |
| 1o2d | VTGKSSSKKNGSLD       | Strand | Helix  | 1.55  | 1.12  |

|      |                   |        |        |       |       |
|------|-------------------|--------|--------|-------|-------|
| 1ogo | IRVPADANGRKF      | Strand | Strand | 0.949 | 0.61  |
| 1ubk | QAVNSPHGFIAV      | Helix  | Strand | 1.07  | 0.7   |
| 1qhd | RDKIVEGTLYSNVSDL  | Helix  | Helix  | 1.25  | 1.06  |
| 1h2w | FREVTVKGIDASDYQT  | Strand | Strand | 1.87  | 1.52  |
| 1ew4 | TITFENGSKII       | Strand | Strand | 0.883 | 0.564 |
| 1cv8 | GSRVESRNGMHAGHA   | Strand | Strand | 1.78  | 1.5   |
| 1i24 | LMELGLEPHYLSDSL   | Helix  | Helix  | 1.48  | 1.2   |
| 1eif | QVNVGSLKVGQYVM    | Strand | Strand | 1.74  | 1.26  |
| 1ou8 | VLNLSASATGNL      | Strand | Strand | 1.65  | 1.12  |
| 1cpm | VISLGFDAASKGFHTY  | Strand | Strand | 1.52  | 1.25  |
| 1bx4 | YIAGFFLTVSPES     | Strand | Helix  | 1.19  | 0.943 |
| 1hfe | DLLHTHWFDKSKGV    | Helix  | Helix  | 1.93  | 1.38  |
| 1oux | VLNSGSSGKVQ       | Strand | Strand | 1.28  | 0.821 |
| 1me4 | IIKNSWTTQWGEEGYIR | Strand | Strand | 2.43  | 2.05  |
| 1ug6 | LGHWTGEHAPGLRNLEA | Helix  | Helix  | 2.24  | 1.86  |
| 1k5c | ITFAKTTLDGPLFTI   | Strand | Strand | 1.91  | 1.57  |
| 1qhd | GFDYSCAINAPANTQQ  | Strand | Strand | 1.96  | 1.63  |
| 1obo | GLYSELDDVDFNGKLVA | Helix  | Strand | 2.22  | 1.8   |
| 1k5c | KAQRTATSASVS      | Strand | Strand | 1.83  | 1.18  |
| 1gp0 | FVCRPEAGPTNRPLMI  | Strand | Strand | 1.96  | 1.61  |
| 1tl2 | KIGNGGWNQFQFLF    | Strand | Strand | 1.58  | 1.11  |
| 1ds1 | EFHTEMAYHRLQPNYVM | Strand | Strand | 2.42  | 2.03  |
| 1uke | EQQSGSKDGEMIA     | Helix  | Helix  | 1.05  | 0.818 |
| 1gci | NLYGSGLVNAEA      | Helix  | Helix  | 1.68  | 1.11  |
| 1ql0 | LNNNSTTKFANW      | Strand | Strand | 1.51  | 1.02  |
| 1gwm | LKRNSGSFRGGSLR    | Strand | Strand | 1.95  | 1.37  |

|      |                      |        |        |       |       |
|------|----------------------|--------|--------|-------|-------|
| 1elk | EKATDGSLQSEDWAL      | Helix  | Helix  | 1.48  | 1.22  |
| 1k92 | QRWVASQITGEV         | Helix  | Strand | 1.76  | 1.17  |
| 1h2w | FYNTGLQNQRVLY        | Strand | Strand | 0.872 | 0.672 |
| 1nte | ARNGLLTEHNI          | Helix  | Strand | 0.858 | 0.556 |
| 1fj2 | AIVPAARKATAAV        | Strand | Strand | 1.67  | 1.3   |
| 1hz4 | LRHTAKPEFANNHFLOGQ   | Helix  | Helix  | 2.11  | 1.87  |
| 1gwm | FQDAPGNGDRIWI        | Strand | Strand | 1.77  | 1.42  |
| 1hdo | MLRCLTTDEYDGHSTY     | Helix  | Strand | 1.87  | 1.54  |
| 1es5 | VVLAQSNLNLDKAVT      | Helix  | Strand | 2.02  | 1.68  |
| 1pdo | RIVVDKEHYEV          | Helix  | Strand | 1.27  | 0.825 |
| 1of4 | RIEFDRTAGVKELH       | Strand | Strand | 1.77  | 1.26  |
| 1llf | ADNIAGFGGDP          | Helix  | Strand | 1.28  | 0.854 |
| 1e42 | SCLIPNLVLFVEDGKMERQV | Strand | Helix  | 3.06  | 2.95  |
| 1oqq | GMLESVTAELKPNSRL     | Helix  | Strand | 1.67  | 1.41  |
| 1gpi | DVDMSNLPCGLNGA       | Strand | Strand | 1.61  | 1.15  |
| 1mf7 | VVRELFNITNGARKNAFKI  | Helix  | Strand | 2.48  | 2.15  |
| 1iby | VENKSPISEGF          | Strand | Strand | 0.614 | 0.411 |
| 1kyf | QRWKQLSNPQQEVQ       | Helix  | Strand | 1.91  | 1.36  |
| 1k3i | SSWDPSTGIVSDRTVT     | Strand | Strand | 2.42  | 2.04  |
| 1mpl | NTYLPGLLPDDRITVRQ    | Helix  | Helix  | 1.98  | 1.64  |
| 1o7j | VITHGTDTVEE          | Strand | Helix  | 1.63  | 1.04  |
| 1jku | RLYSMTEDEGV          | Helix  | Helix  | 0.907 | 0.579 |
| 1dl2 | INDVLDFDIDAEVN       | Helix  | Strand | 1.81  | 1.27  |
| 1cc8 | KIKKTGKEVRS          | Helix  | Strand | 0.919 | 0.596 |
| 1brt | VLIHGFPLSGHSWERQ     | Strand | Helix  | 2.25  | 1.92  |
| 1mg4 | RTLSDNVNLPQGVRTIY    | Helix  | Strand | 2.71  | 2.2   |

|      |                     |        |        |       |       |
|------|---------------------|--------|--------|-------|-------|
| 1gxm | AFLMTQPQTAEI        | Helix  | Helix  | 0.507 | 0.346 |
| 1m65 | EANIKNVDGEIDCSGKM   | Strand | Helix  | 2.14  | 1.76  |
| 1gak | LQLKHLPVNKKT        | Helix  | Helix  | 0.52  | 0.334 |
| 1eom | VAKWTPTQGAKGMM      | Helix  | Strand | 2.02  | 1.72  |
| 1dk8 | RKYILDNNGIVS        | Helix  | Helix  | 1.06  | 0.713 |
| 1dzk | TRENGIPEENIVN       | Helix  | Strand | 1.62  | 1.26  |
| 1ayl | LIGGTWYGGEM         | Strand | Helix  | 1.6   | 1.07  |
| 1oaa | TLNAFQDSPGLSKT      | Helix  | Strand | 1.45  | 1.04  |
| 1mfm | VVHEKADDLGKGGNEQSTK | Strand | Helix  | 2.4   | 2.08  |
| 1l2l | QASLFLDGPIYV        | Helix  | Strand | 1.29  | 0.856 |
| 1fkm | QISWNGIPKIHRPV      | Helix  | Helix  | 1.74  | 1.28  |
| 1kwf | AASMTGYDLNF         | Helix  | Helix  | 1.4   | 0.921 |
| 1gui | IWQAGDYGISGARVS     | Strand | Strand | 1.79  | 1.45  |
| 1lk9 | AGNAANYVNVSNPEQYIE  | Strand | Strand | 2.2   | 2     |
| 1gak | RDMRWNLGPGF         | Helix  | Helix  | 1.49  | 0.965 |
| 1i24 | TVYGKGGQTRG         | Strand | Strand | 1.46  | 0.934 |
| 1byi | LQRNSSLQLDYAT       | Helix  | Helix  | 1.61  | 1.27  |
| 1aly | ANTHSSAKPCGQQ       | Strand | Strand | 1.65  | 1.3   |
| 1qks | IEDTGGQTPHPGRGANF   | Strand | Strand | 2.34  | 1.97  |
| 1tig | VRLSPTIEEHD         | Strand | Helix  | 0.664 | 0.437 |
| 1oe1 | RDLETWFIRGGSAG      | Strand | Strand | 1.9   | 1.41  |
| 1gkl | LVAPGATHWWGY        | Strand | Helix  | 1.04  | 0.69  |
| 1llf | LVRDGKYASVPVII      | Helix  | Strand | 1.17  | 0.87  |
| 1moq | IEEVRARGGQLYV       | Helix  | Strand | 1.52  | 1.19  |
| 1glc | LVIRDVTGEDSASI      | Strand | Strand | 1.63  | 1.16  |
| 1mla | LYEVGPGKVLV         | Strand | Helix  | 1.21  | 0.794 |

|      |                    |        |        |       |       |
|------|--------------------|--------|--------|-------|-------|
| 1kqr | YYSTTNYDSVNMT      | Strand | Strand | 1.26  | 1.02  |
| 1jeo | LISGSGRTEVS        | Strand | Helix  | 1.35  | 0.875 |
| 1p5z | SIEGNIAAGKST       | Strand | Helix  | 1.86  | 1.25  |
| 1ls1 | FLVGLQGSGKTT       | Strand | Helix  | 1.15  | 0.753 |
| 1jh6 | SLLYAELTEEE        | Strand | Helix  | 1.38  | 0.884 |
| 1sfp | EIIDGLPGSPVLG      | Strand | Strand | 1.96  | 1.55  |
| 1jlx | RETNEAAALFRS       | Helix  | Strand | 1.13  | 0.763 |
| 1qau | ILRGPEGFTTH        | Strand | Strand | 1.72  | 1.12  |
| 1qw9 | QYYGNRDNDTAN       | Strand | Helix  | 1.57  | 1.03  |
| 1jlx | FSADKILDPLAQFEV    | Strand | Strand | 2.02  | 1.64  |
| 1kmv | EAMNHPGHLKL        | Helix  | Strand | 1.03  | 0.698 |
| 1k5n | LENGKETLQRADPPKTH  | Helix  | Strand | 2.59  | 2.15  |
| 1uca | GALRPHAAGPNGRRTKS  | Helix  | Strand | 2.29  | 1.96  |
| 1ayl | ELEAYGISDVHDIVY    | Helix  | Strand | 1.44  | 1.17  |
| 1ubk | DALKHLGVKAINI      | Helix  | Strand | 1.41  | 1.14  |
| 1dci | VSGAGKMFTSGIDLMD   | Strand | Helix  | 2.76  | 2.27  |
| 1fo6 | VALTTTLEDEVI       | Strand | Strand | 0.944 | 0.635 |
| 1fj2 | RPVTLNMNVAM        | Strand | Strand | 0.859 | 0.574 |
| 1hh8 | LATSMKSEPRHSKID    | Helix  | Helix  | 1.68  | 1.44  |
| 1bx4 | QILAEDKHKEL        | Strand | Helix  | 0.96  | 0.623 |
| 1ojr | YIPLSQPMPLLANTPFI  | Strand | Strand | 2.17  | 1.8   |
| 1dqz | YAADGGRNGVF        | Helix  | Strand | 1.09  | 0.694 |
| 8abp | FLVKQPEEPWF        | Strand | Helix  | 0.73  | 0.466 |
| 1a2p | EADINYTSGFRNSDRIL  | Strand | Strand | 1.78  | 1.5   |
| 1mf7 | SLVKPITQLLGRHTHTAT | Helix  | Helix  | 2.32  | 1.98  |
| 1h32 | ASRGNGLSVEGPSVR    | Helix  | Strand | 2.25  | 1.87  |

|      |                      |        |        |       |       |
|------|----------------------|--------|--------|-------|-------|
| 1pi1 | QEFNLIDRRRELAPLQEL   | Helix  | Helix  | 1.98  | 1.67  |
| 1pcf | YWMDPEGEMKP          | Strand | Strand | 1.36  | 0.923 |
| 1llf | VVRPPGTKAGANLPV      | Strand | Strand | 1.73  | 1.41  |
| 1qwn | INSQAHFNVQA          | Helix  | Strand | 0.714 | 0.477 |
| 1jcl | RDMGVEKTVGFK         | Helix  | Strand | 1.37  | 0.88  |
| 1kng | TELGKDKRFQLV         | Helix  | Strand | 1.25  | 0.818 |
| 1qwn | NLVDIGSLDNTEI        | Strand | Strand | 1.61  | 1.27  |
| 1cfz | VGVIPESLEPHIGLTPTV   | Strand | Helix  | 2.41  | 2.13  |
| 1odz | YAYSPNNFWDVTEAN      | Strand | Helix  | 1.79  | 1.51  |
| 1o97 | FAGVQSSDQAYASTGI     | Strand | Helix  | 2.17  | 1.78  |
| 1jcl | ELFGADWADARHYRFGA    | Helix  | Strand | 2.38  | 2     |
| 1c7g | VETVSMISRDE          | Strand | Helix  | 0.71  | 0.454 |
| 1ht6 | VKIGSRYDVGAVIPAGFVTS | Strand | Strand | 2.76  | 2.63  |
| 1a2p | DIFSNREGKLPKSGRTWRE  | Strand | Strand | 2.56  | 2.38  |
| 1nxb | TKTCSPGESSCYH        | Strand | Strand | 1.81  | 1.41  |
| 1e42 | LRIQPGNPNYTL         | Strand | Strand | 0.922 | 0.62  |
| 1muw | ESAGYEGPRHF          | Helix  | Strand | 1.61  | 1.09  |
| 1h2w | VFLDPNLSDDGTVAL      | Strand | Strand | 2.32  | 1.91  |
| 1ubk | MFFGQTVHEQCPRLPH     | Helix  | Helix  | 1.95  | 1.6   |
| 1btn | HEWEAHNKKASSRSWHNV   | Strand | Strand | 2.43  | 2.15  |
| 1ojr | IVTGSGKFFRNVQLDPAA   | Strand | Helix  | 2.11  | 1.96  |
| 1dcs | KRAVTSPVPTMRRGFT     | Helix  | Strand | 1.9   | 1.54  |
| 1m15 | YYPLTGMSKAT          | Strand | Helix  | 0.634 | 0.424 |
| 1o97 | KESDTEVVEVV          | Helix  | Strand | 1.23  | 0.808 |
| 1ie9 | DVTKAGHSLEL          | Helix  | Helix  | 0.795 | 0.523 |
| 1i40 | DRFMSTAMFYPCNYG      | Strand | Strand | 1.94  | 1.59  |



|      |                      |        |        |       |       |
|------|----------------------|--------|--------|-------|-------|
| 1k3i | ISMDGNGQIVV          | Strand | Strand | 0.85  | 0.543 |
| 1h2w | KIFPLEVGSVV          | Strand | Strand | 1.78  | 1.13  |
| 2ebo | FLLQRWGGTCH          | Helix  | Helix  | 1.21  | 0.806 |
| 1nuy | IYSINEGYAKEFDPAI     | Strand | Helix  | 1.78  | 1.48  |
| 1ql0 | RKLIDRADISSVYT       | Helix  | Strand | 1.38  | 1.01  |
| 1o2d | ILTDPEGNKRKRG        | Strand | Strand | 1.01  | 0.656 |
| 1nof | AYKNTDGKMMVI         | Strand | Strand | 0.967 | 0.627 |
| 1o8x | SKHFNVESIPTLI        | Helix  | Strand | 1.46  | 1.17  |
| 2sak | VELDPSAKIEV          | Strand | Strand | 1.17  | 0.78  |
| 1pgs | FTFPADVTTVKTKT       | Strand | Strand | 1.43  | 0.976 |
| 1k94 | IGLMGYRLSPQT         | Helix  | Helix  | 1.03  | 0.68  |
| 1lok | LSENNFQPKRSI         | Helix  | Strand | 1.52  | 0.991 |
| 1qst | EKWKGYIKDYDGGTLM     | Helix  | Strand | 2.04  | 1.67  |
| 1cqy | VVKNVPTTIGDTV        | Strand | Strand | 1.62  | 1.28  |
| 1ofz | AAYGGSWNTPGQI        | Strand | Strand | 1.85  | 1.44  |
| 1is3 | YIQLSNGETVE          | Strand | Strand | 0.791 | 0.505 |
| 1psu | EIVNQQQKTVA          | Strand | Strand | 0.955 | 0.648 |
| 1e5k | LNHQKRDAPVVW         | Helix  | Strand | 1.19  | 0.814 |
| 1n7o | LSLMKEYFSDEE         | Helix  | Helix  | 1     | 0.684 |
| 1pqh | IWNVTNGKRFS          | Strand | Strand | 0.509 | 0.345 |
| 1e87 | YFISTVKRSWTS         | Strand | Helix  | 1.31  | 0.84  |
| 1qlw | LSHSQSGIYPF          | Strand | Helix  | 1.24  | 0.791 |
| 1o7j | HLTVKSDKPVVF         | Helix  | Strand | 1.3   | 0.846 |
| 1b65 | VQANHGQRDWLTIAGVPVGQ | Strand | Helix  | 2.98  | 2.78  |
| 1hzt | IDATPWAFSPWM         | Helix  | Helix  | 1.2   | 0.782 |
| 1nof | MQTNGAPLYAIS         | Helix  | Strand | 1.45  | 0.928 |

|      |                      |        |        |       |       |
|------|----------------------|--------|--------|-------|-------|
| 1iqz | FEGCPTDSIKV          | Helix  | Strand | 0.782 | 0.515 |
| 1dj7 | AKRTDTYFCSDLV        | Helix  | Helix  | 2.08  | 1.47  |
| 1aol | GKQVTSWTTGHYW        | Helix  | Strand | 1.78  | 1.41  |
| 1qs1 | GAYLSAIGGFASEKEIL    | Strand | Strand | 2.1   | 1.77  |
| 7a3h | HAADNQLADPNVMY       | Helix  | Strand | 1.23  | 0.876 |
| 1qwn | LETHIDSGDIFY         | Strand | Strand | 1.54  | 1     |
| 1o4y | ELADDSKNIFW          | Helix  | Strand | 0.904 | 0.596 |
| 1a8e | AIAANEADAVTL         | Helix  | Strand | 1.19  | 0.778 |
| 1g8a | IFEDVAQPTQAK         | Strand | Helix  | 1.45  | 0.929 |
| 1nw1 | SRIKGGMSNML          | Strand | Strand | 1.16  | 0.763 |
| 1hju | NVLKQGTLELSDFDMMG    | Helix  | Strand | 1.97  | 1.68  |
| 1ka1 | YLRLPIKLSYQEKIWDHAAG | Strand | Helix  | 2.64  | 2.43  |
| 1hz4 | ALEELPPGWFYS         | Helix  | Helix  | 1.26  | 0.812 |
| 1ga6 | SFDAAQGTGALI         | Strand | Strand | 1.97  | 1.32  |
| 1mk0 | IKNTLNKVVYV          | Strand | Strand | 1.3   | 0.83  |
| 1dk0 | GLSGGDTSPYSIQ        | Strand | Strand | 1.64  | 1.33  |
| 1ngn | SELLKPLGLYDL         | Helix  | Helix  | 1.08  | 0.726 |
| 1o9g | LTDLPYGERTHWEGQVPGQP | Strand | Helix  | 2.9   | 2.7   |
| 1fp2 | LLKYILHNWTDKD        | Strand | Helix  | 1.47  | 1.15  |
| 1kth | FWYGGCGGNENKFGSQKE   | Strand | Helix  | 1.75  | 1.55  |
| 1hoe | ADNGCAETVTV          | Strand | Strand | 1.06  | 0.722 |
| 1nxm | WVDLREGETFGNTYQ      | Strand | Strand | 1.68  | 1.42  |
| 1k04 | AQQYVMTSLQQE         | Helix  | Helix  | 1.4   | 0.939 |
| 1psr | FHKYTRRDDKIDKPS      | Helix  | Helix  | 1.8   | 1.54  |
| 1a8d | IKRYTPNNEIDSFVKSGDFI | Strand | Strand | 2.29  | 2.2   |
| 1c8c | TYDEGGGKTGR          | Strand | Strand | 1.38  | 0.895 |

|      |                      |        |        |       |       |
|------|----------------------|--------|--------|-------|-------|
| 1aox | RKYAYSAASGGRRSATKV   | Helix  | Strand | 2.17  | 1.95  |
| 1psr | EKKDKNEDKKIDFSE      | Helix  | Helix  | 1.42  | 1.2   |
| 1n1d | VMGDDWEGKFDFLKDQCEVV | Strand | Strand | 2.61  | 2.46  |
| 3cla | ALSCPYSDDIDQ         | Strand | Helix  | 1.23  | 0.8   |
| 1k7j | DRLEKQVDLII          | Helix  | Strand | 1.14  | 0.762 |
| 1edg | VRATGGKNASRYLMC      | Helix  | Strand | 1.15  | 0.965 |
| 1jlx | WRLSTDDWILV          | Strand | Strand | 0.88  | 0.58  |
| 1qq5 | ARELVSGTIAPLT        | Helix  | Helix  | 1.45  | 1.16  |
| 1g64 | NLLEPHGVEFQ          | Helix  | Strand | 0.718 | 0.48  |
| 1kxg | LIADSETPTIQK         | Strand | Strand | 1.42  | 0.943 |
| 1nof | YSTSASLNVEYG         | Strand | Strand | 1.28  | 0.837 |
| 1jnr | FRFKDGYGPGVGAW       | Strand | Helix  | 1.36  | 1.06  |
| 1dy5 | RQHMDSSSTAASSSNYCN   | Helix  | Helix  | 2.8   | 2.48  |
| 1jlx | IKSRYTNKYLIV         | Strand | Strand | 1.48  | 1.01  |
| 1euw | DLRACLNDAREL         | Strand | Strand | 1.54  | 0.991 |
| 1mg4 | YAISPDRFRSFEA        | Strand | Helix  | 1.92  | 1.52  |
| 1oru | RIIFPSGAALL          | Strand | Strand | 0.523 | 0.344 |
| 1cnv | HFDIQKPVDELNWDN      | Strand | Helix  | 1.63  | 1.34  |
| 1t1d | TLNQFPDILLGNPQK      | Helix  | Helix  | 1.72  | 1.45  |
| 1lc5 | FLCTPNNPTGILLPERPL   | Strand | Helix  | 2.27  | 1.84  |
| 1cxy | WETKSYGEPHSSLA       | Helix  | Helix  | 1.94  | 1.38  |
| 1qhd | QLMRPPNMTPAV         | Strand | Helix  | 1.21  | 0.815 |
| 1qwn | LAFSEQGLLKS          | Strand | Strand | 0.654 | 0.424 |
| 8abp | SELSKAQATGFYG        | Helix  | Strand | 1.5   | 1.21  |
| 1cl2 | RVNHPALPGSKGHEF      | Strand | Helix  | 1.85  | 1.58  |
| 1cpm | SMKPAKNTGIVS         | Strand | Strand | 1.31  | 0.892 |

|      |                     |        |        |       |       |
|------|---------------------|--------|--------|-------|-------|
| 1kyf | YGNKTSTQFLNF        | Strand | Strand | 1.23  | 0.793 |
| 1ayl | DNFDKYTDTAG         | Helix  | Helix  | 1.29  | 0.866 |
| 1c7g | CLAVTVNLAGGQPVSAN   | Strand | Helix  | 2.43  | 2.25  |
| 1mai | YKLQEDCKTIW         | Strand | Strand | 1.34  | 0.912 |
| 1ayl | KNMFIRPSDEE         | Helix  | Helix  | 0.774 | 0.502 |
| 1cv8 | GQTQGRSPQLL         | Helix  | Strand | 0.723 | 0.461 |
| 1bx4 | LDKYSLKPNDQI        | Helix  | Strand | 1.56  | 1.07  |
| 1p4o | SSIKEEMEPGFRE       | Helix  | Helix  | 1.35  | 1.08  |
| 1lqt | FFGNVVVGEHVQPGE     | Strand | Helix  | 1.35  | 1.13  |
| 1r5l | REAGVPLAPLPLTDSF    | Helix  | Helix  | 1.97  | 1.66  |
| 1pkh | IIKPFNKDFVGPCSYDV   | Strand | Strand | 2.29  | 1.9   |
| 1dl2 | WYIGEREQGLHGQLSPKMD | Strand | Strand | 3.2   | 2.83  |
| 1ixh | DIYLGKIKKWDDEAI     | Helix  | Helix  | 1.66  | 1.38  |
| 1nep | KLPVKNEYPSIKVV      | Strand | Strand | 1.65  | 1.21  |
| 1h6h | FEQLPDDVAIS         | Helix  | Strand | 1.28  | 0.872 |
| 1pz4 | KRLESIDPANRQVEHVYK  | Helix  | Strand | 2.54  | 2.3   |
| 1b65 | TIENEP RPGRKRPARSG  | Strand | Strand | 2.25  | 2.09  |
| 4eug | QKKGAIIDKQRHHVL     | Helix  | Strand | 1.54  | 1.28  |
| 1j53 | CARYEIDNSKRTLHGALL  | Helix  | Helix  | 2.45  | 2.24  |
| 1g8a | VKKHKFPGVYT         | Strand | Strand | 0.995 | 0.645 |
| 1fkm | FQNEHVEFIQF         | Helix  | Helix  | 1     | 0.679 |
| 1knm | VGVQSGLCCLD         | Strand | Strand | 0.686 | 0.438 |
| 1d5t | LYTEVTRYLDFKV       | Helix  | Strand | 1.86  | 1.45  |
| 1ojr | WLKGWDERNGGNLT      | Helix  | Strand | 1.85  | 1.32  |
| 1oqv | QTYRGLGNYPATADATA   | Helix  | Helix  | 2.09  | 1.74  |
| 1aly | FELQPGASVVFV        | Strand | Strand | 1.19  | 0.762 |

|      |                   |        |        |       |       |
|------|-------------------|--------|--------|-------|-------|
| 1i0i | MYFTRRPASLK       | Helix  | Strand | 1.3   | 0.883 |
| 1ig3 | TSNTYDGSGGLVT     | Strand | Strand | 1.6   | 1.08  |
| 1bqc | SVLQGEEDYVLI      | Helix  | Strand | 1.34  | 0.863 |
| 1e6u | VYLAAAKVGGIVA     | Strand | Helix  | 2     | 1.54  |
| 1oqv | IKAGGAVALAD       | Strand | Helix  | 1.02  | 0.684 |
| 1ubk | INIAGCPPNPYN      | Strand | Helix  | 1.46  | 0.965 |
| 2sns | EVEFNKGQRDKYGRGLA | Strand | Strand | 1.85  | 1.64  |
| 1qv1 | FRGCGMEYGKEIAFPQ  | Helix  | Helix  | 2.11  | 1.78  |
| 1hdk | TEAASLSTGSTVT     | Strand | Strand | 1.72  | 1.33  |
| 1oqw | TFTMGGAGPKNKGKIIT | Strand | Strand | 2.44  | 2.08  |
| 1r5l | VLTDSFPLKVRG      | Helix  | Strand | 1.53  | 1.01  |
| 1qgv | AILSEEDRVVV       | Helix  | Strand | 0.944 | 0.622 |
| 1ezm | LLANSPGWDTRK      | Helix  | Helix  | 0.944 | 0.625 |
| 1o4t | MAHLLSKEAMHNKARL  | Strand | Strand | 1.96  | 1.65  |
| 1jov | ELFSDLNIEA        | Strand | Strand | 0.884 | 0.582 |
| 1o08 | AEEIGINGVDRQF     | Helix  | Helix  | 1.65  | 1.33  |
| 1eu8 | IASGWLEPLDDY      | Helix  | Helix  | 1.04  | 0.666 |
| 1jlx | LVRWSPNHYWITA     | Strand | Strand | 1.97  | 1.52  |
| 1m40 | ALGPDGKPSRIV      | Strand | Strand | 1.62  | 1.06  |
| 1lk9 | TKYFDKKGYYVW      | Helix  | Strand | 0.845 | 0.574 |
| 1pq7 | AQYGTSAITNQMFC    | Helix  | Strand | 1.69  | 1.24  |
| 1i40 | YEIDKESGALFV      | Strand | Strand | 0.941 | 0.642 |
| 1el6 | NFSIKDVGTIIT      | Helix  | Strand | 1.32  | 0.848 |
| 1qcz | AESAEENGYQVII     | Helix  | Strand | 1.4   | 1.09  |
| 1oaa | LAAADLGTEAG       | Strand | Helix  | 1.01  | 0.664 |
| 1lqt | MLEMLPTPWGLVR     | Strand | Helix  | 1.34  | 1.03  |

|      |                       |        |        |       |       |
|------|-----------------------|--------|--------|-------|-------|
| 1usc | HWLGSHSGREVDKGGQAPHFL | Helix  | Strand | 2.42  | 2.33  |
| 1mw9 | TINKYLGSDYVV          | Helix  | Strand | 1.15  | 0.761 |
| 1ix9 | EELITKLDQLPADK        | Helix  | Helix  | 1.54  | 1.11  |
| 1uol | TLEDSSGNLLG           | Strand | Strand | 0.606 | 0.411 |
| 1o98 | IIFYNFRPDRAIQI        | Strand | Helix  | 1.95  | 1.43  |
| 1lyc | NIELAFPANGGLTDT       | Helix  | Helix  | 1.58  | 1.33  |
| 1luq | TYEAAVGNAESRYVL       | Strand | Strand | 1.93  | 1.59  |
| 1dqz | WVYCGNGTPSDLGGDNIPA   | Strand | Helix  | 2.77  | 2.41  |
| 1qqf | ASYLNLQRPYT           | Helix  | Helix  | 0.983 | 0.658 |
| 1m2x | MNIATHSHDDRAGGLEY     | Strand | Helix  | 2.43  | 1.97  |
| 1hd2 | ALKAKGVQVVA           | Helix  | Strand | 0.801 | 0.544 |
| 1m1n | WMEYNFFGPTK           | Strand | Helix  | 1.09  | 0.741 |
| 1gkl | ATGSEDIAYAN           | Strand | Helix  | 1.04  | 0.688 |
| 1lbu | QSAYGLAADGIAGPAT      | Helix  | Helix  | 1.46  | 1.24  |
| 1kgd | VLLGAHGVGRRH          | Strand | Helix  | 1.43  | 0.963 |
| 1dj0 | VKTVPDDFHARFSATARR    | Strand | Strand | 2.33  | 2.11  |
| 1k92 | IGGRHGLGMSDQ          | Helix  | Strand | 1.18  | 0.772 |
| 1omr | WGFFGKKDDDKLTEKE      | Helix  | Helix  | 1.84  | 1.51  |
| 1oa9 | LTFTSGPVAGKTMV        | Strand | Strand | 1.89  | 1.41  |
| 1qhd | LNRSQPAHDNLMGT        | Strand | Strand | 1.96  | 1.4   |
| 1gyc | LVSISCDPNYTF          | Strand | Strand | 1.66  | 1.11  |
| 1ufh | TDLLPRGLETPHHHL       | Helix  | Strand | 1.9   | 1.55  |
| 1gwm | ILDVDFDLPFDRID        | Strand | Strand | 1.55  | 1.11  |
| 1jl1 | WEWVKGHAGHPEN         | Strand | Helix  | 1.52  | 1.23  |
| 1sfp | TIQMPPEYHVR           | Strand | Strand | 1.15  | 0.77  |
| 1kd0 | LPHALINNVEEKLGLKGEKL  | Strand | Helix  | 2.71  | 2.55  |

|      |                      |        |        |       |       |
|------|----------------------|--------|--------|-------|-------|
| 1sfp | VIATYYGPKTNCV        | Strand | Strand | 1.53  | 1.23  |
| 1dzk | LLGKGTDIEDQD         | Strand | Helix  | 1.26  | 0.836 |
| 1pgs | EIDVTDFKSLLSGNT      | Strand | Strand | 2.01  | 1.67  |
| 1gxy | LQLLSNGDCHSV         | Helix  | Strand | 1.6   | 1.05  |
| 1nf9 | DFWGPGMRASPAD        | Helix  | Helix  | 1.98  | 1.53  |
| 1jlx | AATQNVDETAILEI       | Strand | Strand | 1.5   | 1.07  |
| 1dm9 | AITEQRRPASE          | Strand | Helix  | 1.65  | 1.07  |
| 1nw1 | SRPLSCHEISLAHM       | Strand | Helix  | 1.14  | 0.837 |
| 1llf | SVLMGKPIIHV          | Helix  | Strand | 0.692 | 0.456 |
| 1p1m | QAMGFKSGKIEEGWNADLVV | Helix  | Strand | 2.84  | 2.62  |
| 1orn | IDKYNGEVPRDRDE       | Helix  | Helix  | 1.52  | 1.11  |
| 1mpl | RRDLSCGISVY          | Strand | Strand | 0.701 | 0.455 |
| 1k3i | SMLPRQDGNQNGWIGRHE   | Strand | Strand | 2.26  | 2.03  |
| 1lg7 | VRSNRPFRTYSD         | Strand | Helix  | 1.38  | 0.925 |
| 1o8x | EVEVKSLAGKLVF        | Strand | Strand | 1.89  | 1.5   |
| 2pth | LVPTTFMNLGKA         | Strand | Helix  | 1.63  | 1.27  |
| 1a34 | LKPLFKTGDSTEEFEG     | Strand | Strand | 2.23  | 1.88  |
| 1oqw | EVPLGVAADANKLGTIA    | Strand | Strand | 2.51  | 2.11  |
| 1m4j | SFVLPLEDKQPCYV       | Helix  | Strand | 1.73  | 1.43  |
| 1fp2 | VDVGGGTGTTA          | Strand | Helix  | 1.05  | 0.704 |
| 1ayo | QTLPQTCDGPKAHTSFQ    | Strand | Strand | 1.97  | 1.66  |
| 1eom | ATGTNKIPASKMVF       | Helix  | Strand | 1.6   | 1.13  |
| 3sil | MCTTSKGTIVV          | Strand | Strand | 0.553 | 0.37  |
| 1f0i | STLAPFPNGAF          | Strand | Helix  | 1.68  | 1.09  |
| 1lug | YPGSLTTPPLLECVTW     | Strand | Strand | 2.33  | 1.99  |
| 1qs1 | LKKSLDFKNDINAEAHS    | Strand | Helix  | 2.16  | 1.8   |

|      |                    |        |        |       |       |
|------|--------------------|--------|--------|-------|-------|
| 1ds1 | CSRADHERTAATLV     | Strand | Strand | 2.07  | 1.54  |
| 1p35 | NKIMNTQLTKPVLV     | Strand | Strand | 1.32  | 0.955 |
| 1l7a | AVPDKEGPHPA        | Strand | Strand | 0.881 | 0.571 |
| 1ixh | LIHKDQKKPEQ        | Strand | Helix  | 1.36  | 0.893 |
| 1nof | AVNTNDSQML         | Strand | Strand | 1.3   | 0.883 |
| 1by2 | RLADGGATNQGR       | Strand | Strand | 1.62  | 1.05  |
| 1e42 | SLKLTNGIWIL        | Strand | Strand | 0.653 | 0.43  |
| 1mpx | RVYVSPEQPSYIS      | Strand | Strand | 1.27  | 0.995 |
| 1aox | KFVQGLDIGPTKTQV    | Helix  | Strand | 2.14  | 1.79  |
| 1l3l | TDLAAIEGDECI       | Helix  | Helix  | 1.19  | 0.814 |
| 1ayl | FTAKLAPTPTF        | Strand | Strand | 2.23  | 1.51  |
| 1c7g | TMSGKKDCLVNIGGFL   | Strand | Strand | 2.18  | 1.86  |
| 1qcz | AGAGGAAHLPG        | Strand | Helix  | 0.871 | 0.574 |
| 2nlr | VVQNNRWGSTAPQCV    | Strand | Strand | 1.62  | 1.33  |
| 1gpi | TPHPCTTTGQTRC      | Strand | Strand | 1.48  | 1.2   |
| 1o7j | VFVAAMRPATAISADGPM | Strand | Helix  | 2.57  | 2.28  |
| 1qqq | QKNDRTGTGTL        | Strand | Strand | 1.2   | 0.811 |
| 1pqh | RVKVTHADLHYEGTCAI  | Strand | Strand | 2.37  | 1.92  |
| 1nls | SASTGLYKETNTIL     | Strand | Strand | 1.75  | 1.27  |
| 1n0w | YIDTEGTFRPER       | Strand | Helix  | 0.898 | 0.604 |
| 1odz | TYGPVADNADW        | Strand | Helix  | 0.685 | 0.465 |
| 1tig | TIRFKGRAITHKE      | Strand | Helix  | 1.5   | 1.17  |
| 1p1m | CLILKDFSSEPFWG     | Strand | Strand | 1.25  | 0.89  |
| 1nn5 | SYLQKKSDVEDHS      | Helix  | Helix  | 1.55  | 1.21  |
| 1e6i | RMYNGENTSYY        | Helix  | Helix  | 0.684 | 0.451 |
| 1cl2 | AYLMGQMVDADT       | Helix  | Helix  | 1.08  | 0.697 |



|      |                    |        |        |       |       |
|------|--------------------|--------|--------|-------|-------|
| 1jlx | TFKGNNGKYL         | Strand | Strand | 1.25  | 0.813 |
| 1a8d | EAVKLRDLKTYSVQLK   | Strand | Strand | 2.07  | 1.68  |
| 1ht6 | LFQGFNWESWKQSGGWYN | Strand | Helix  | 2.55  | 2.31  |
| 1e1a | LHFKPQTKTIF        | Strand | Strand | 0.647 | 0.426 |
| 1mai | IVFKDQRNTLDL       | Strand | Strand | 1.5   | 0.995 |
| 1m2x | QQKFSGAQYVV        | Helix  | Strand | 1.63  | 1.04  |
| 1k5n | VVPSGEEQRYTC       | Strand | Strand | 1.18  | 0.76  |
| 2nlr | TVARGLAENDWYLT     | Helix  | Strand | 1.15  | 0.818 |
| 1cun | KLLVSEDYGRDLTG     | Helix  | Helix  | 2.02  | 1.72  |
| 1kqr | TTFNPPVDYWM        | Strand | Strand | 0.793 | 0.506 |
| 1ofz | YWQKGREELYE        | Strand | Strand | 1.13  | 0.764 |
| 1kt6 | RVRLNNDVDC         | Strand | Strand | 1.13  | 0.757 |
| 1ocy | DRTIPVGAIMM        | Helix  | Strand | 0.897 | 0.582 |
| 1hyo | QWEYVPLGPFLGK      | Helix  | Helix  | 1.24  | 1.01  |
| 1g3p | IGLAIPEYGDTPIPG    | Strand | Strand | 4.64  | 3.96  |
| 1ou8 | IYARENGDGVM        | Strand | Strand | 1.06  | 0.674 |
| 1cpm | YRSTNIYGYGLY       | Strand | Strand | 1.63  | 1.05  |
| 1r5l | EISADLHPRSIIGL     | Helix  | Helix  | 1.85  | 1.32  |
| 1mwp | QIAMFCGRLNMHM      | Strand | Strand | 1.07  | 0.832 |
| 1h2w | LIKEGYTSPKRLTI     | Helix  | Strand | 1.49  | 1.05  |
| 1ozn | VCYNEPKVTTS        | Strand | Strand | 1.27  | 0.862 |
| 1cq3 | VTKQDQTPNDKICQSVT  | Strand | Strand | 2.06  | 1.86  |
| 1vls | FKNMTPLPAMAEA      | Helix  | Helix  | 0.963 | 0.742 |
| 1jyk | IIVGYLKEQFDYLLK    | Strand | Helix  | 1.87  | 1.31  |
| 1n7o | GIIAGNQYYDSKNDQM   | Helix  | Helix  | 1.86  | 1.55  |
| 1o4y | EGYGSDRGGTWF       | Strand | Helix  | 1.54  | 1.05  |

|      |                      |        |        |       |       |
|------|----------------------|--------|--------|-------|-------|
| 1ogo | WWHNNLGGGQTW         | Strand | Strand | 1.51  | 1.02  |
| 1lk9 | FSYQELPQSEYC         | Strand | Strand | 1.32  | 0.846 |
| 1ga6 | YESKPSWQSVVSGTPGRRL  | Strand | Strand | 2.02  | 1.78  |
| 1dqi | KVQVGKEIPHPNTTEHHIRY | Strand | Strand | 2.66  | 2.46  |
| 1ubk | SVLRAFEPYIDT         | Helix  | Helix  | 1.24  | 0.836 |
| 1eaz | VKQGAVMKNWKR         | Strand | Strand | 1.46  | 0.955 |
| 1ufy | FTVTEDLTSAFP AE      | Strand | Helix  | 1.61  | 1.13  |
| 1oqw | ALKPDPADGTADITL      | Strand | Strand | 1.6   | 1.34  |
| 1o98 | GFLDGRDVG PQTAPQ     | Strand | Helix  | 2.03  | 1.71  |
| 1fqj | VKGLKHPHRYVL DAA     | Helix  | Helix  | 1.83  | 1.51  |
| 1jyo | IIPLSPVCGDSI         | Strand | Helix  | 1.53  | 1.01  |
| 1oa9 | CQWRFDWFQ NADNPSFT   | Helix  | Strand | 2.29  | 1.88  |
| 1okg | IVDCRYSLKIKDHGSIQYA  | Strand | Helix  | 2.6   | 2.33  |
| 1pq7 | VRVHPSYSGNNNDLAIL    | Strand | Strand | 1.81  | 1.5   |
| 1gpc | VVKDPAAPENEGKVFK     | Strand | Strand | 2.1   | 1.72  |
| 1jcl | TVT NFPHGND DIDI     | Strand | Helix  | 1.99  | 1.46  |
| 1bqc | VVLSNGVRWSKNGPSD     | Strand | Helix  | 2.05  | 1.69  |
| 1aly | FCSNREASSQAPFI       | Strand | Strand | 1.64  | 1.2   |
| 1fvi | EISIEGATFQD          | Strand | Helix  | 0.983 | 0.658 |
| 1dqz | WKRNDPMVQIPR         | Helix  | Helix  | 0.865 | 0.564 |
| 1gvf | STTYNMPLALH          | Helix  | Strand | 1.18  | 0.786 |
| 1mdz | LDSGWIT TGPKN        | Helix  | Helix  | 1.5   | 0.967 |
| 1i1w | VTPENSMKWDA          | Strand | Helix  | 1.5   | 0.956 |
| 1qwn | GDDFRFKQ NTE         | Strand | Helix  | 1.72  | 1.13  |
| 1l9y | VLESMRCDIFL          | Helix  | Strand | 1.03  | 0.656 |
| 1ao3 | IGIGDRY DAAQ         | Strand | Helix  | 0.798 | 0.541 |

|      |                     |        |        |       |       |
|------|---------------------|--------|--------|-------|-------|
| 1k3i | SVVLPDGSTFI         | Strand | Strand | 0.533 | 0.356 |
| 1fi2 | GILGSLDSGNKLYS      | Strand | Strand | 1.71  | 1.2   |
| 1ao3 | ISKANIGPRLTQV       | Helix  | Strand | 1.96  | 1.59  |
| 1g6l | LKENNLDLNE          | Helix  | Strand | 1.18  | 0.764 |
| 1hdo | HIGDQPLTGAYTVT      | Strand | Strand | 1.95  | 1.39  |
| 1lkf | ISSQSNDSVNV         | Strand | Strand | 1.43  | 0.925 |
| 1nls | ELDTYPNTDIGDPSYPHIG | Strand | Strand | 2.22  | 2.02  |
| 1k3b | VHDVLGRNWAC         | Strand | Strand | 1.28  | 0.841 |
| 1qj4 | VFHNSVLPDTEHCPSYVV  | Strand | Helix  | 2.59  | 2.3   |
| 1lj9 | RQEDASNKKIKRI       | Strand | Strand | 1.52  | 1.24  |
| 1m2d | VEKHLKGGEPVERLVIS   | Helix  | Strand | 2.12  | 1.78  |
| 1i40 | FEHYKDLEKGGKWKV     | Helix  | Strand | 1.71  | 1.42  |
| 1nwz | GQLDGLAFGAI         | Helix  | Strand | 1.53  | 0.992 |
| 1d5t | LICDPSYVPDRVRK      | Strand | Strand | 1.79  | 1.31  |
| 1a34 | AWTQLTPPVNEYSFVR    | Strand | Strand | 1.92  | 1.64  |
| 1pdo | GWIDFVPGENAET       | Strand | Helix  | 1.41  | 1.11  |
| 1lbu | ADLGAGSQGFCA        | Strand | Helix  | 1.95  | 1.29  |
| 1jm1 | LDYDSSTGDIY         | Strand | Strand | 0.759 | 0.492 |
| 1qwn | LHDNPEMKFIW         | Helix  | Strand | 1.68  | 1.09  |
| 1f9v | FAYGQTGSGKTF        | Strand | Helix  | 1.74  | 1.14  |
| 1gci | AVKVLGASGSGSVSS     | Strand | Helix  | 2.56  | 2.18  |
| 1fqi | KLFLAPGARRWINIDGKT  | Helix  | Helix  | 2.48  | 2.27  |
| 1tl2 | LFLSPGGELYG         | Strand | Strand | 0.901 | 0.593 |
| 1bdy | LVQKKPTMYPEWKSTFD   | Strand | Strand | 2.63  | 2.21  |
| 1lj8 | QGLVSDDALISQ        | Helix  | Helix  | 1.24  | 0.849 |
| 1k04 | SKIQPAPPEEYVP       | Helix  | Helix  | 0.972 | 0.749 |

|      |                      |        |        |      |       |
|------|----------------------|--------|--------|------|-------|
| 1oe1 | MTFNGSMPGPTLVV       | Strand | Strand | 2.02 | 1.42  |
| 1bqc | LRAAGFEHTLVV         | Helix  | Strand | 1.03 | 0.683 |
| 1nnf | KEEGDKTPADV FY       | Helix  | Strand | 1.67 | 1.34  |
| 1jov | QENVSPRHISENVDC      | Strand | Strand | 1.67 | 1.39  |
| 1g2r | IVKNKEGQVFI          | Strand | Strand | 0.76 | 0.5   |
| 1l8j | CELPPEGSRAHVF        | Strand | Strand | 1.45 | 1.15  |
| 1nls | FMFNQFSKDQKDLIL      | Strand | Strand | 2.04 | 1.66  |
| 1n3l | KKAGAEVVKQVEHPLLSG   | Helix  | Helix  | 2.39 | 2.12  |
| 1utg | SLKEFEPDDTM          | Helix  | Helix  | 1.3  | 0.83  |
| 1mxi | HLIEPLGFTWDDKRL      | Strand | Helix  | 2.07 | 1.7   |
| 8abp | IGINGVDAVSE          | Strand | Helix  | 1.43 | 0.973 |
| 1mpl | ALMSGQLMSAAQ         | Helix  | Helix  | 1.31 | 0.883 |
| 1o2d | GYLSRKSTPPS          | Helix  | Helix  | 1.15 | 0.766 |
| 1fdr | TVVSRETAAGSLT        | Strand | Strand | 1.2  | 0.935 |
| 3sil | NNIRNSGLRRSFET       | Strand | Strand | 1.82 | 1.28  |
| 1bys | MMAYSFTAPDI          | Strand | Helix  | 1.32 | 0.88  |
| 1r75 | TYPMFSNILYR          | Strand | Strand | 1.24 | 0.792 |
| 1nep | ELTDDKNQRFF          | Strand | Strand | 1.42 | 0.949 |
| 1n1p | EIAPMPAGLETWVSL      | Strand | Strand | 1.79 | 1.49  |
| 1qw9 | AKKRSKKTIHLS         | Helix  | Strand | 1.71 | 1.17  |
| 1jmv | AESVDYPISEKLS        | Helix  | Strand | 1.37 | 1.08  |
| 1e6u | VFDASKPDGTPRKLLDVTRL | Strand | Helix  | 2.84 | 2.7   |
| 1nkr | YGSVTHSPYQVSAPSDPLDI | Strand | Strand | 2.8  | 2.58  |
| 1ecd | IIGELPNIEAD          | Helix  | Helix  | 1.24 | 0.817 |
| 1onw | DITSSIDEPVAPAE       | Strand | Helix  | 1.61 | 1.16  |
| 1jg1 | EIANLKPGMNILE        | Helix  | Strand | 1.14 | 0.886 |

|      |                     |        |        |       |       |
|------|---------------------|--------|--------|-------|-------|
| 1l7a | QPVDYPADGVKV        | Strand | Strand | 0.865 | 0.564 |
| 1kv7 | AAVGWFGDTLL         | Helix  | Strand | 1.52  | 0.971 |
| 1mwp | QEVYPELQITN         | Helix  | Strand | 0.972 | 0.631 |
| 1bx4 | WMIQQPHKAATF        | Helix  | Strand | 1.57  | 1.06  |
| 1k92 | MIACGFDYKMSVEKAYSTD | Helix  | Strand | 2.39  | 2.08  |
| 1jmk | QKLQPEGPLTL         | Helix  | Strand | 1.39  | 0.886 |
| 1p4o | IMELMTRGDLKS        | Strand | Helix  | 1.46  | 0.98  |
| 3vub | FVDVQSDIIDTPGRRM    | Strand | Strand | 1.9   | 1.55  |
| 1h2c | GVADQKTYSFDS        | Strand | Helix  | 1.24  | 0.808 |
| 1kv7 | FATSDNRPLYV         | Strand | Strand | 0.805 | 0.538 |
| 1mpx | WTTWLVDHQRFDGRPDVLT | Helix  | Strand | 2.87  | 2.74  |
| 1hd2 | GRAHKAEGKVRL        | Helix  | Strand | 1.59  | 1.29  |
| 1kmv | KLTEQPELANKVDM      | Helix  | Strand | 1.73  | 1.29  |
| 1dk0 | AISSTANQVTAF        | Strand | Strand | 1.6   | 1.06  |
| 1r5l | HGVLRSRDPTGSKVL     | Strand | Strand | 1.64  | 1.34  |
| 1k3i | SLLLPDGRVFN         | Strand | Strand | 0.849 | 0.576 |
| 1hz4 | IEVLSSYQPQQQLQC     | Helix  | Helix  | 1.83  | 1.54  |
| 1scf | DLLDKFSNISEGLSNYS   | Helix  | Helix  | 1.84  | 1.57  |
| 1jnr | LFAIGDCAGANPHKFSS   | Strand | Helix  | 2.44  | 1.98  |
| 1iv3 | VGALAHSDGDAAM       | Strand | Helix  | 2.07  | 1.66  |
| 1koi | VKVAVTAGNYY         | Strand | Strand | 1.64  | 1.09  |
| 1qj4 | VLIHTICHGAWIWHKLP   | Strand | Helix  | 2.6   | 2.41  |
| 1c2a | CLPSRSRPSRRVC       | Strand | Strand | 1.69  | 1.35  |
| 1eom | FGAYAEGGTNQAN       | Strand | Helix  | 1.74  | 1.34  |
| 1dqg | YFNYGNRQEKNIKLY     | Strand | Strand | 1.96  | 1.67  |
| 1dqz | EEYYQSGLSVI         | Helix  | Strand | 1.2   | 0.801 |

|      |                     |        |        |       |       |
|------|---------------------|--------|--------|-------|-------|
| 1i0i | MLLDTRHSIEGHHVL     | Strand | Strand | 2.06  | 1.74  |
| 1h4a | GDYADHQWGLSDSVRSCR  | Strand | Strand | 2.88  | 2.69  |
| 1b5e | YKSKSLFVKDIPGETPKIW | Helix  | Helix  | 2.55  | 2.29  |
| 1cl2 | IQAATKYLVGHSDAMIGTA | Strand | Strand | 2.46  | 2.21  |
| 1at0 | FVFADRIEEKNQVL      | Strand | Strand | 1.56  | 1.16  |
| 1b0x | FTAAGYTTLEA         | Helix  | Helix  | 0.842 | 0.571 |
| 1cnv | TKSVYPRDKNLFL       | Helix  | Strand | 1.72  | 1.33  |
| 1hxn | AAFVCPGSSRLH        | Strand | Strand | 0.88  | 0.601 |
| 1h03 | GEWSGPPPECR         | Strand | Strand | 1.15  | 0.733 |
| 1o7j | ILYGYQDDPEYLY       | Strand | Helix  | 1.4   | 1.09  |
| 1lj8 | DRFSNQAIADQLER      | Helix  | Helix  | 1.53  | 1.1   |
| 1ix2 | WRAVSSDTHPITG       | Strand | Strand | 1.14  | 0.876 |
| 1pzw | RQHFWFEVLPNDEISKVIC | Helix  | Strand | 2.35  | 2.13  |
| 1qks | IMDGETLEPKK         | Strand | Strand | 1.27  | 0.862 |
| 1gpi | SIWDDHAANMLWL       | Strand | Helix  | 1.59  | 1.23  |
| 1jk3 | VWSNVTPLKFS         | Helix  | Strand | 0.816 | 0.554 |
| 1lj8 | DKLASPEIRIVS        | Helix  | Strand | 0.97  | 0.623 |
| 1qu9 | FTEHNATFPARS        | Helix  | Strand | 1.51  | 0.973 |
| 1g9o | AEKAGLLAGDRLV       | Helix  | Strand | 1.32  | 1.07  |
| 1mfm | FEQKESNGPVKV        | Strand | Strand | 1.03  | 0.704 |
| 1oru | QSYYPDQPKLAS        | Helix  | Helix  | 1.28  | 0.822 |
| 1dcs | QQTPCANGFVSLQA      | Strand | Strand | 1.5   | 1.11  |
| 1h2w | ANQRPDIFGCVI        | Helix  | Strand | 1.41  | 0.949 |
| 1jub | SINSMGLPNLGFYD      | Strand | Helix  | 2.05  | 1.52  |
| 1aol | EVTNGDRETVW         | Strand | Strand | 1.06  | 0.69  |
| 1br9 | KMHITLCDFIVP        | Strand | Strand | 1.31  | 0.894 |

|      |                      |        |        |       |       |
|------|----------------------|--------|--------|-------|-------|
| 2sak | WALDATAYKEFRVV       | Helix  | Strand | 1.57  | 1.17  |
| 1m1n | FREMHSWDYSGPYHGFD    | Strand | Helix  | 2.31  | 1.88  |
| 1i1w | VVNEAFNEDGSLRQTVFL   | Strand | Helix  | 2.06  | 1.86  |
| 1kzk | NLLTQIGCTLN          | Helix  | Strand | 1.09  | 0.716 |
| 1nwz | ENTLAKMDDGQ          | Helix  | Helix  | 1     | 0.669 |
| 1es5 | AMNNGTGTTLY          | Strand | Strand | 1.02  | 0.693 |
| 1k4i | VDAEHPSTTTGISAHD     | Strand | Helix  | 2.2   | 1.85  |
| 1qqh | VYFDGNKDNMT          | Strand | Strand | 1.24  | 0.849 |
| 1o1x | IAANRYRGIRAAL        | Helix  | Strand | 1.25  | 1.01  |
| 1bx4 | AREQGFETKDIKE        | Helix  | Helix  | 1.54  | 1.2   |
| 1lok | KQVSHSGYNQKSVV       | Strand | Strand | 1.41  | 1.02  |
| 1f8e | TDGSATGPAET          | Strand | Strand | 1.33  | 0.846 |
| 1qs1 | DTHLTAQQVSSKERVIL    | Strand | Strand | 2.26  | 1.86  |
| 1ear | LEVEWEDLNKRILR       | Strand | Strand | 1.6   | 1.18  |
| 1dcs | YLTDCGLTDTE          | Strand | Helix  | 1.76  | 1.14  |
| 1cq3 | EVTESEDESEEV         | Strand | Strand | 1.15  | 0.752 |
| 1jmv | QVMNTIKIDML          | Helix  | Strand | 0.718 | 0.473 |
| 1jlx | ASANEPDENKSNWACTLFKP | Strand | Strand | 2.87  | 2.65  |
| 1qqf | LNDERYYGGGYGSTQA     | Helix  | Helix  | 1.92  | 1.58  |
| 1qwn | KRRRLDKLPLQANYYP     | Strand | Strand | 2.29  | 1.88  |
| 1k5c | QSYPPDDVGNPMTGAPFSD  | Strand | Strand | 2.53  | 2.35  |
| 1h32 | EIYYTRYGQLDLSCAS     | Helix  | Helix  | 1.99  | 1.7   |
| 1qhd | FQTGGIGNLPIRNW       | Strand | Strand | 1.76  | 1.24  |
| 1muw | DDLIPFGSSDTE         | Helix  | Helix  | 1.18  | 0.767 |
| 1a6q | SRLEVTDDLEK          | Helix  | Helix  | 1.03  | 0.677 |
| 1odz | DIEAGLYDNQWYR        | Helix  | Helix  | 1.49  | 1.2   |

|      |                      |        |        |       |       |
|------|----------------------|--------|--------|-------|-------|
| 1gui | IADPGTDTWHIQF        | Strand | Strand | 1.71  | 1.37  |
| 1d3v | VVLGGDHSMAIG         | Strand | Helix  | 1.78  | 1.21  |
| 1p4o | LNANKFVHRDLAARNCMV   | Helix  | Strand | 2.42  | 2.14  |
| 1a2p | QALGWVASKGNLAD       | Helix  | Helix  | 1.89  | 1.39  |
| 1lok | MAYAAEEVGLRGS        | Strand | Helix  | 1.69  | 1.37  |
| 1okc | KEQGFLSFWRGNLAN      | Helix  | Helix  | 1.95  | 1.6   |
| 1i8a | VAMGSLDKNATAK        | Strand | Strand | 1.95  | 1.5   |
| 1nw1 | RVYFNPETESH          | Strand | Helix  | 1.08  | 0.688 |
| 1jyk | LVYGDDYKVQD          | Strand | Strand | 1.1   | 0.728 |
| 1e1a | LRIDLKTGKKTV         | Strand | Strand | 1.41  | 0.963 |
| 1j22 | IVEGSLYGIRNVHPNA     | Strand | Helix  | 2.34  | 1.93  |
| 1fi2 | QFNVGKTEAYM          | Strand | Strand | 1.33  | 0.904 |
| 1es9 | VVLGLLPRGQHPNPLR     | Strand | Helix  | 2.24  | 1.88  |
| 1eu8 | LIHKYKISPPNTYTEMTEEP | Helix  | Helix  | 2.53  | 2.43  |
| 1qq5 | DMAQAYNRLTPYPDAAQ    | Helix  | Helix  | 2.27  | 1.84  |
| 1l9y | IKKLGFKFSDTKI        | Helix  | Strand | 1.38  | 1.06  |
| 1jg1 | IPVGSYHLWQEL         | Strand | Strand | 1.3   | 0.837 |
| 1nuy | GSTNVTGDQVK          | Strand | Strand | 1.18  | 0.766 |
| 1e42 | FTNKALQHMTDFAIQ      | Strand | Strand | 1.76  | 1.5   |
| 1k92 | LLYQGRWFDSQA         | Helix  | Helix  | 1.11  | 0.746 |
| 1i71 | WCYTMDPSVRWEY        | Strand | Strand | 1.5   | 1.2   |
| 1odz | LKADPDAREIAFLL       | Helix  | Strand | 1.47  | 1.06  |
| 1mk4 | TVKQRGCTRVK          | Helix  | Strand | 0.606 | 0.411 |
| 1ofz | GSTAPGTGIGA          | Strand | Strand | 1.62  | 1.03  |
| 1gci | ANLSLGSPSPSATL       | Strand | Helix  | 1.75  | 1.23  |
| 1odm | RVKQVNAERQS          | Strand | Strand | 1.08  | 0.731 |



|      |                     |        |        |       |       |
|------|---------------------|--------|--------|-------|-------|
| 1lo7 | ASFVCTASYDDVLT      | Strand | Strand | 1.79  | 1.26  |
| 1qtw | FAAGYDLRTPAE        | Helix  | Helix  | 1.17  | 0.784 |
| 1h03 | QIDVPGGILFGATIS     | Strand | Strand | 1.29  | 1.07  |
| 1l9y | LLSKGQNNPFVDPTG     | Helix  | Helix  | 1.68  | 1.37  |
| 2bop | FTVADNGAERQG        | Strand | Strand | 1.06  | 0.71  |
| 1mml | LSDFPQAWAET         | Helix  | Helix  | 0.813 | 0.552 |
| 1hxn | MVSDNHGATYV         | Strand | Strand | 0.611 | 0.402 |
| 1o7q | NKHFVGVGHPVIF       | Helix  | Strand | 1.04  | 0.689 |
| 1pa9 | VHVGWNPQDTAVSSEV    | Strand | Helix  | 2.22  | 1.81  |
| 1dqz | SMWGPSSDPAW         | Helix  | Helix  | 1.17  | 0.76  |
| 1kt6 | AKKDPEGLFLQDNI      | Strand | Strand | 1.67  | 1.19  |
| 1jeo | TIPLEVKKSKYLPMTTF   | Strand | Helix  | 2.43  | 2.18  |
| 1odm | AHLTNNYYKAPIHRV     | Helix  | Strand | 1.92  | 1.64  |
| 1p1m | VTLGTDGAASNSLNLFF   | Strand | Helix  | 2.39  | 2.14  |
| 1m4l | LKFSTGGSNRPAIW      | Strand | Strand | 1.59  | 1.13  |
| 1qau | RLFKRKVGGLGFLV      | Strand | Strand | 1.74  | 1.26  |
| 1n55 | AIAAKLTKDAWNQVVL    | Helix  | Strand | 1.86  | 1.51  |
| 1fr2 | LIYYPKEGDDDDSPSG    | Helix  | Helix  | 1.1   | 0.931 |
| 1a3c | GKNIPTSKSEKVM       | Strand | Strand | 1.5   | 1.22  |
| 1k3i | IITLGEPGTSPNTV      | Strand | Strand | 1.53  | 1.14  |
| 1h2w | HCDLTKEELEPRVF      | Strand | Strand | 1.63  | 1.21  |
| 1je1 | QYLRDNACVASTPDFEL   | Helix  | Helix  | 2.07  | 1.77  |
| 1qwg | VKFGWGTSVIDRDV      | Strand | Helix  | 2.09  | 1.74  |
| 1lj8 | LYELGDTDDTEVRV      | Strand | Strand | 1.26  | 0.922 |
| 1qqq | LIKRKPESIFDYRFEDFEI | Strand | Strand | 2.51  | 2.31  |
| 1qtw | VIENTAGQGSNLGFKFEH  | Strand | Helix  | 2.38  | 2.16  |

|      |                      |        |        |       |       |
|------|----------------------|--------|--------|-------|-------|
| 1a6q | HFFTQDHKPSNPLE       | Strand | Helix  | 1.69  | 1.21  |
| 1jtv | ATLRDLKTQGRL         | Strand | Helix  | 1.28  | 0.838 |
| 1g64 | VFTGNGKGKTT          | Strand | Helix  | 1.24  | 0.789 |
| 1g61 | TLLPIFLDKDD          | Strand | Helix  | 1.18  | 0.78  |
| 1b5e | SFVADEPFIFGALNDEY    | Strand | Helix  | 2.25  | 1.89  |
| 1whi | LKVADNSGARE          | Strand | Strand | 1.44  | 0.96  |
| 1ltz | SIYCLDSASPNRV        | Helix  | Strand | 1.47  | 1.18  |
| 1n1p | AKLNWTRDQNAPA        | Strand | Helix  | 1.38  | 1.12  |
| 1h2w | FKTNRHSPNYRLI        | Strand | Strand | 1.74  | 1.38  |
| 1hju | EERAGVSYKNTNGNAQPLEN | Helix  | Helix  | 2.37  | 2.21  |
| 1uca | NTLWPNVLRANNQQ       | Helix  | Helix  | 1.7   | 1.19  |
| 1lni | ITGEATQEDYY          | Strand | Strand | 1.04  | 0.696 |
| 1n8k | VAKIDAASPLEK         | Strand | Helix  | 1.34  | 0.912 |
| 2arc | AGQGEGRYSEL          | Helix  | Helix  | 1.3   | 0.844 |
| 1gqo | ILNGPNVNRLGSREPEV    | Strand | Helix  | 2.48  | 2.06  |
| 1pil | RQAVMLPEGEDLNE       | Helix  | Helix  | 1.69  | 1.24  |
| 1qcz | VEVNSAHRTPDK         | Strand | Helix  | 1.04  | 0.688 |
| 1m2i | VLREQAGGDATAN        | Helix  | Helix  | 1.37  | 1.08  |
| 1ji3 | TTIATPHDGTTLVNMVDFTD | Strand | Helix  | 2.09  | 1.93  |
| 1koi | YHYDPKTQDTFY         | Strand | Strand | 1.29  | 0.88  |
| 1ltz | YWYTVFGLIN           | Helix  | Strand | 1.4   | 0.937 |
| 1hyo | RSNFKHMYWTMLQ        | Strand | Helix  | 1.41  | 1.12  |
| 1m15 | VWVNEEDHLRI          | Strand | Strand | 1.63  | 1.11  |
| 1ear | IGNRHTMCIE           | Helix  | Strand | 1.17  | 0.748 |
| 1c5e | GILAVAADQTSTTLT      | Strand | Strand | 1.9   | 1.58  |
| 1bqc | VYASDPTGNTVF         | Helix  | Strand | 0.965 | 0.63  |

|      |                     |        |        |       |       |
|------|---------------------|--------|--------|-------|-------|
| 1jl7 | GDAFGGRDHTT         | Helix  | Helix  | 1.02  | 0.671 |
| 1lo7 | FIKCGLPPWRQ         | Helix  | Helix  | 0.771 | 0.493 |
| 1eom | IASGIDVYAWNK        | Strand | Helix  | 1.39  | 0.921 |
| 1jl7 | DIAGADNGAGV         | Helix  | Helix  | 0.577 | 0.392 |
| 1ucs | KAEVVTPMGIPAEIIPK   | Strand | Helix  | 1.7   | 1.42  |
| 1kng | SIEWGVYGVPETF       | Helix  | Strand | 1.14  | 0.926 |
| 1el6 | FSGTVTDDSLPPGSPIT   | Strand | Strand | 2.31  | 1.95  |
| 1e1a | KVTEDIPGAEGP        | Strand | Strand | 1.56  | 1     |
| 1mpx | AKAAGLEQLPWW        | Helix  | Helix  | 0.599 | 0.397 |
| 1qks | EWAGITEGQPRVV       | Helix  | Strand | 1.34  | 1.07  |
| 1jfb | HQRSMVEPTFTPEA      | Helix  | Helix  | 1.58  | 1.11  |
| 1eu8 | NALRGKSSDPDV        | Helix  | Strand | 1.36  | 0.913 |
| 1orn | EQDIRSIGLYRN        | Helix  | Helix  | 1.34  | 0.902 |
| 1lok | ALSASLPNASV         | Helix  | Strand | 1.06  | 0.688 |
| 1oio | MRPYNGSSAGSVQTTVN   | Strand | Strand | 2.04  | 1.72  |
| 1ezm | MKVHYGRSVENAYW      | Strand | Strand | 1.89  | 1.35  |
| 1opd | EVTITAPNGLHTRP      | Strand | Helix  | 1.46  | 1.07  |
| 1nkd | LNELADAADEQ         | Helix  | Helix  | 1.07  | 0.724 |
| 1ld8 | LAKEKDTIRKEY        | Helix  | Helix  | 1.81  | 1.2   |
| 1eom | SIVIDKWKLDGIS       | Helix  | Strand | 2.12  | 1.72  |
| 1hxx | ALVTGGASGVG         | Strand | Helix  | 1.3   | 0.84  |
| 1fo6 | KRYFEPGDLGFPVYD     | Helix  | Strand | 1.96  | 1.64  |
| 1dzk | INVDEEGDKTI         | Strand | Strand | 1.02  | 0.654 |
| 1a8d | YYRRLYNGLKFI        | Strand | Strand | 1.51  | 1     |
| 1d0d | FWICPEDHTGADYYSSYRD | Strand | Helix  | 2.7   | 2.39  |
| 1lug | HWNTKYGDFGK         | Strand | Helix  | 0.7   | 0.447 |

|      |                     |        |        |       |       |
|------|---------------------|--------|--------|-------|-------|
| 1i40 | VLVPTYPLQPGSVTR     | Strand | Strand | 1.97  | 1.62  |
| 1n3l | EKYLPA LGYSKR VHL   | Helix  | Strand | 1.81  | 1.51  |
| 1kyf | IFKAKHPMDTEI        | Strand | Helix  | 1.12  | 0.768 |
| 1mrj | QIGKRVDKTF LPSLAI   | Helix  | Helix  | 1.81  | 1.53  |
| 1gkl | VVTPTFNGGNCTA QNFYQ | Strand | Helix  | 2.26  | 2.04  |
| 1ecd | SFDKVKGDPVG         | Helix  | Helix  | 0.929 | 0.603 |
| 1ao3 | YLTSEM HGARPGASKA   | Helix  | Strand | 2.02  | 1.72  |
| 1a8d | SAEITGLGA IREDNNIT  | Strand | Strand | 1.95  | 1.66  |
| 1g9o | LHGEK GKLGQYI       | Strand | Strand | 1.29  | 0.857 |
| 1ixh | AKLNPGLKLPSQNI AVV  | Helix  | Strand | 2.36  | 2.01  |
| 1bbp | VAKYPNSVEKYGKCG     | Strand | Strand | 1.92  | 1.62  |
| 1mj5 | LPGLILRPLSEAE       | Helix  | Helix  | 0.86  | 0.697 |
| 1nof | QYARFVRPGALRI       | Helix  | Strand | 1.16  | 0.897 |
| 1ls1 | LVDTAGRLQIDEPL      | Strand | Helix  | 2.06  | 1.51  |
| 2tnf | SRFAISYQE KVN       | Strand | Strand | 0.688 | 0.456 |
| 1fdr | ETRQMTKHLRRRPGHMTA  | Helix  | Strand | 3.15  | 2.79  |
| 1o7j | MLALTRTSDPKV        | Helix  | Helix  | 1.57  | 1.01  |
| 1fvk | YTTLEKPVAGAPQVLE    | Strand | Strand | 2.5   | 2.06  |
| 1mf7 | LIDGSGSIIPHD        | Strand | Helix  | 1.6   | 1.09  |
| 1gyc | IVVNGVFPSPLITG      | Strand | Strand | 1.53  | 1.11  |
| 1b5e | QFDYNKDGMSDFMCTNT   | Helix  | Strand | 2.19  | 1.86  |
| 1i8a | AIKWTKIKPTPNTVI     | Strand | Strand | 1.53  | 1.26  |
| 1of4 | EWNGE VGN GALQ      | Strand | Strand | 1.7   | 1.12  |
| 3seb | LIYSIKDTKLGNYDNVR   | Strand | Strand | 2.26  | 1.88  |
| 1i1w | MTRYK GKIRAWD       | Helix  | Strand | 0.9   | 0.596 |
| 1b65 | GQHMRDGT PQS        | Helix  | Helix  | 1.17  | 0.76  |

|      |                       |        |        |       |       |
|------|-----------------------|--------|--------|-------|-------|
| 1e9g | IGAKNTLEYKVY          | Strand | Strand | 1.34  | 0.914 |
| 1onw | AVQAGIPLARVTL         | Helix  | Strand | 0.87  | 0.697 |
| 1ogo | VAFPDGLQTNISIGTGESII  | Strand | Strand | 2.79  | 2.48  |
| 1k3i | LTFGGSPDYQSDATNAHI    | Strand | Strand | 2.58  | 2.38  |
| 1e6u | ELVLRTRDELNLLDSRA     | Strand | Helix  | 1.69  | 1.42  |
| 1jnr | EDLEKLAARDLHE         | Helix  | Helix  | 1.5   | 1.16  |
| 1jk3 | AHAFGPGSGIGGDAHF      | Strand | Strand | 1.87  | 1.54  |
| 1o7i | RQIQTKNGVRTI          | Strand | Strand | 1.22  | 0.796 |
| 1fj2 | AFAGIRSSHIKY          | Helix  | Strand | 1.22  | 0.819 |
| 1ig3 | LISTPDQDHTDFT         | Strand | Helix  | 1.43  | 1.16  |
| 1oa9 | DLNIPGGGVGLFDGCTP     | Strand | Helix  | 2.23  | 1.81  |
| 1mfm | VTADKDGADV            | Strand | Strand | 0.809 | 0.549 |
| 1mfg | RVEKDPELGFSI          | Strand | Strand | 1.73  | 1.18  |
| 1ds1 | YIRTDNRNGQLSGGERAGDVV | Strand | Strand | 2.4   | 2.21  |
| 1mka | LGWLGEGGKGR           | Helix  | Strand | 1.29  | 0.852 |
| 1ifr | LVWKAQNTWGCNSLRT      | Strand | Strand | 2.33  | 1.93  |
| 1o98 | YYSMDRDKRWDR          | Helix  | Helix  | 0.908 | 0.611 |
| 1kt6 | VFARDPSGFSPEV         | Strand | Helix  | 1.99  | 1.61  |
| 1ka1 | IIDFGNYEGGRKGRFW      | Helix  | Strand | 2.22  | 1.82  |
| 1i40 | IEIPANADPIKY          | Strand | Strand | 1.15  | 0.774 |
| 1btn | CEVALDYKKKKHVFK       | Strand | Strand | 1.89  | 1.53  |
| 1qks | IETSKMEGWEDKYAI       | Strand | Strand | 1.76  | 1.48  |
| 1nc5 | ADMIEELPKKHPNR        | Helix  | Helix  | 1.43  | 1.02  |
| 1idp | MVSSKQVLGDPTLRT       | Helix  | Strand | 1.72  | 1.45  |
| 1mjf | MLAHPKPKRVL           | Helix  | Strand | 0.931 | 0.632 |
| 1qks | LIDGSTYEIKT           | Strand | Strand | 1.33  | 0.863 |

|      |                      |        |        |       |       |
|------|----------------------|--------|--------|-------|-------|
| 1p1m | IYFDGEYPTIDSEE       | Strand | Helix  | 1.85  | 1.3   |
| 1qq5 | ALMGRYADFWS          | Helix  | Helix  | 0.716 | 0.464 |
| 1cv8 | QLLNRMTTYNE          | Strand | Helix  | 1.46  | 0.993 |
| 1g8a | LYLGIASGTTAS         | Strand | Helix  | 1.66  | 1.08  |
| 1k3x | YSHNQLYGVWR          | Strand | Strand | 1.38  | 0.925 |
| 1k4i | VRHSSGLICAP          | Helix  | Strand | 0.973 | 0.641 |
| 1dqg | QTATCNPEAESQKFRW     | Strand | Strand | 2.24  | 1.82  |
| 1nuy | AVRKAGIAHLYGIAG      | Helix  | Strand | 2.12  | 1.76  |
| 1qks | ATSHMGDDSPA          | Strand | Strand | 1.12  | 0.715 |
| 1cnv | FVRFYNDRSCQYSTGNIQRI | Strand | Helix  | 2.9   | 2.7   |
| 1e7l | FNRSGKGGVDYLE        | Helix  | Helix  | 1.7   | 1.44  |
| 1oaa | LQKDTFQSGAHV         | Helix  | Strand | 1.35  | 0.919 |
| 1tul | YYLKKRGVGAH          | Strand | Strand | 1.58  | 1.04  |
| 1dcs | TLVTGGQVKAPRHHV      | Helix  | Strand | 1.99  | 1.62  |
| 1ak0 | GILGSSSSSYLASIASWAD  | Helix  | Helix  | 2.26  | 1.96  |
| 1hdk | DFHTEMKEESDIVF       | Strand | Strand | 2.31  | 1.67  |
| 1gv9 | RIAPSLKSQRGS         | Strand | Strand | 1.37  | 0.92  |
| 1fp2 | QVVENLSGSNNLTY       | Helix  | Strand | 1.67  | 1.21  |
| 1odm | GYYSIPGKKAVESF       | Strand | Strand | 1.75  | 1.44  |
| 1qhd | AVCESVLADASETMLA     | Strand | Helix  | 1.96  | 1.67  |
| 1a8e | RKPVDEYKDCHLAQV      | Strand | Strand | 1.61  | 1.37  |
| 1k94 | FFRKRDLQQGSAN        | Helix  | Strand | 1.15  | 0.832 |
| 1fkm | LKHTFSDQHSDIP        | Helix  | Helix  | 1.7   | 1.23  |
| 1gd0 | ERLRISPDRVYI         | Helix  | Strand | 1.84  | 1.2   |
| 1n1d | IPEKNWEQKKQ          | Strand | Helix  | 1.25  | 0.825 |
| 1ak0 | QRVSDSSLSEN          | Helix  | Helix  | 0.845 | 0.568 |

|      |                      |        |        |       |       |
|------|----------------------|--------|--------|-------|-------|
| 1mj5 | VAGAHFIQEDSPDE       | Strand | Helix  | 1.82  | 1.3   |
| 1gyc | APVSPDGFLRDA         | Strand | Strand | 0.678 | 0.449 |
| 1m70 | FSSQKGSVGYADPAL      | Helix  | Helix  | 1.69  | 1.41  |
| 1o2d | EKGSRAKHLKNTPGTFTPEK | Helix  | Helix  | 2.3   | 2.21  |
| 1e9g | VLEIGETIAYTGQVKQ     | Strand | Strand | 1.87  | 1.54  |
| 1o98 | EIEADKYDAII          | Helix  | Strand | 0.803 | 0.521 |
| 1lj8 | DLAQDYLFTL           | Helix  | Strand | 1.7   | 1.15  |
| 1p35 | FTTESSWGKSEKYNW      | Strand | Strand | 1.88  | 1.59  |
| 1oqw | SVKSGTGTEDATKKEVP    | Strand | Strand | 2.28  | 1.85  |
| 1gxy | KVAQSQEFFSDHGTLF     | Helix  | Strand | 2.17  | 1.81  |
| 1am2 | LRVDTADHAFI          | Strand | Strand | 1.02  | 0.672 |
| 1km6 | LISPGVGAQGGDPGE      | Strand | Helix  | 2.02  | 1.72  |
| 1qu9 | KTIATENAPAAIGPYVQGVD | Strand | Strand | 2.34  | 2.23  |
| 1kuf | VVKDHSSKVFM          | Strand | Helix  | 0.944 | 0.631 |
| 1br9 | VTEKNINGHQA          | Helix  | Helix  | 1.41  | 0.915 |
| 1qlw | QIPQRAKRYPITL        | Strand | Strand | 1.65  | 1.34  |
| 1oio | GTAMSGNSWENV         | Strand | Strand | 1.52  | 1.04  |
| 1o7q | VFKIKPEKRWQD         | Strand | Helix  | 1.4   | 0.942 |
| 1lni | TVCLSALPPEA          | Strand | Helix  | 0.728 | 0.494 |
| 1iko | LNCARPDQDVKFT        | Strand | Strand | 1.41  | 1.08  |
| 1lkf | LGYTFFGGDISI         | Strand | Strand | 0.891 | 0.587 |
| 1cl2 | FLESPGSITMEVHDVPA    | Strand | Helix  | 2.45  | 2.01  |
| 1odm | YAVNHGINVQR          | Strand | Helix  | 1.7   | 1.1   |
| 1aba | FINIMPEKGVFDDEK      | Strand | Helix  | 1.95  | 1.58  |
| 1ji3 | IVPYDGTLLKKGWVND     | Strand | Strand | 1.69  | 1.41  |
| 1ny1 | IGNHSFHHPDLTTKTADQ   | Strand | Helix  | 2.4   | 2.15  |

|      |                      |        |        |       |       |
|------|----------------------|--------|--------|-------|-------|
| 1dqz | AAYYPQQFPYAA         | Helix  | Strand | 1.17  | 0.752 |
| 1eaj | VHFTSNDLKSGDASINV    | Strand | Strand | 2.25  | 1.92  |
| 1gp0 | ACFGQTRISVGKANKRLRYV | Strand | Strand | 2.64  | 2.51  |
| 1hyo | NLLSASQARLR          | Helix  | Helix  | 1.49  | 0.951 |
| 1euw | AIHIADPSLAA          | Strand | Strand | 1.37  | 0.916 |
| 1i0i | DDYKGGKGLRPYVNPLVL   | Helix  | Strand | 2.7   | 2.22  |
| 1fye | VFIPFAGVTQTWDE       | Strand | Helix  | 1.83  | 1.32  |
| 1n3l | EILKERELKIY          | Helix  | Strand | 1.45  | 0.942 |
| 1ltz | GVKAKALGALP          | Helix  | Helix  | 1.12  | 0.735 |
| 1oaa | CVLTGASRGFG          | Strand | Helix  | 1.01  | 0.678 |
| 1k94 | AMLD RDHTGKMGFNA     | Helix  | Helix  | 1.94  | 1.58  |
| 2rsp | AMTMEHKDRPLVR        | Strand | Strand | 1.11  | 0.9   |
| 1j00 | LSAGYRMSASAAWPA      | Helix  | Helix  | 2.08  | 1.77  |
| 1qlw | VIDQSGRGRSATDISAI    | Strand | Helix  | 2.27  | 1.86  |
| 1it6 | MSVDETLMCSF          | Strand | Strand | 1.3   | 0.832 |
| 1j9b | IRNSGTEPTII          | Helix  | Strand | 0.747 | 0.492 |
| 1odm | EWHEDVSLITV          | Strand | Strand | 1.39  | 0.887 |
| 1kyf | SVKLPITLNKFFQP       | Strand | Strand | 1.49  | 1.08  |
| 3seb | KYLMMYNDNKMVD        | Helix  | Strand | 1.68  | 1.36  |
| 1ji3 | RTYPGLLPELKRGGRIHI   | Strand | Strand | 2.31  | 2.11  |
| 1n8k | ECVNPQDYKKPIQE       | Strand | Helix  | 1.67  | 1.19  |
| 1mpl | ESVRNKVFSYQD         | Helix  | Helix  | 1.11  | 0.759 |
| 3chb | FQVEVPGSQHIDSQ       | Strand | Helix  | 1.54  | 1.1   |
| 1nnf | FYTEQTATFAD          | Strand | Helix  | 1.3   | 0.828 |
| 2arc | GFFRPDEAHQPH         | Strand | Helix  | 1.11  | 0.758 |
| 1ao3 | RILAGPAGDSNVVKL      | Helix  | Strand | 2.11  | 1.72  |



|      |                     |        |        |       |       |
|------|---------------------|--------|--------|-------|-------|
| 1ako | MGDMNISPTDLDIGIGEEN | Strand | Helix  | 2.68  | 2.33  |
| 1ks8 | SDSITDARNFYASADYRDE | Helix  | Helix  | 2.57  | 2.33  |
| 1dqe | KKEMTLTDAIN         | Helix  | Helix  | 1.35  | 0.873 |
| 1hd2 | KETDLLLDDSLVSI      | Helix  | Helix  | 1.68  | 1.18  |
| 1i8a | NDANEKGQRVG         | Strand | Strand | 0.731 | 0.489 |
| 1a8e | AEFYGSKEDPQTFYY     | Strand | Strand | 1.91  | 1.59  |
| 1cl2 | RLHIGLEDVDD         | Strand | Helix  | 1.16  | 0.784 |
| 1i24 | AIANPAKAGEFRV       | Helix  | Strand | 1.67  | 1.35  |
| 7a3h | ELYGDYPNVIY         | Helix  | Strand | 1.26  | 0.805 |
| 1onw | VVGLLGTDISISRHPES   | Strand | Helix  | 2.61  | 2.2   |
| 1qwn | MRRLTKSSAKTQRV      | Strand | Strand | 1.66  | 1.23  |
| 1plc | SFYCSPHQGAGMVGK     | Strand | Strand | 1.92  | 1.61  |
| 1me4 | WFLAGHPLTNLSEQM     | Helix  | Helix  | 2.05  | 1.75  |
| 1nnf | LSEAGLLAPISEQT      | Helix  | Helix  | 1.22  | 0.905 |
| 1eu8 | VFENAVPRPIVPPYYPQ   | Helix  | Helix  | 1.87  | 1.59  |
| 1oe1 | HSQANRDTRPHL        | Strand | Strand | 1.38  | 0.914 |
| 1dl2 | HEARRRPFFSKSD       | Helix  | Helix  | 1.48  | 1.16  |
| 1mla | FVFPGQGSQTVGMLADM   | Strand | Helix  | 2.55  | 2.17  |
| 1bdy | DAHIYEGRVIQ         | Strand | Strand | 0.971 | 0.62  |
| 1kng | GRYGNPFGRVG         | Helix  | Strand | 1.66  | 1.12  |
| 1o8x | DKFHESKNFEV         | Helix  | Strand | 1.03  | 0.677 |
| 1qhd | AVAALFPNAQPFEHHAT   | Helix  | Strand | 1.71  | 1.44  |
| 1o08 | QFNEQLKGVSRD        | Helix  | Helix  | 1.33  | 1.07  |
| 1ka1 | TITKNDNSPVT         | Strand | Strand | 0.806 | 0.531 |
| 1ofz | SASASAGVSIA         | Strand | Strand | 1.48  | 0.962 |
| 1m70 | FREGNRTNDGDTMIMR    | Helix  | Helix  | 1.73  | 1.48  |

|      |                     |        |        |       |       |
|------|---------------------|--------|--------|-------|-------|
| 1dcs | LRATGTEPDGGVEA      | Helix  | Helix  | 1.58  | 1.16  |
| 1lb3 | FFFDRDDVALEGV       | Helix  | Helix  | 1.3   | 1.05  |
| 1qhd | DEMVRESQRNGIAPQSDSL | Helix  | Helix  | 2.6   | 2.25  |
| 3mag | LISDVRSPTAD         | Strand | Helix  | 1.49  | 0.959 |
| 1kv7 | ILKLMLPKQWGIDDVP    | Helix  | Strand | 2.21  | 1.84  |
| 1lu4 | TFVNNPTAAMSQDE      | Strand | Helix  | 1.89  | 1.4   |
| 1qs1 | YLRNQGGSGNEKL       | Helix  | Helix  | 1.73  | 1.4   |
| 1pzt | KETMLSDGLNSLYMVL    | Helix  | Strand | 2.42  | 1.99  |
| 1qs1 | VTVPSGKGSTTPTKAGV   | Strand | Strand | 2.27  | 1.84  |
| 1qst | SRQLPKMPKEY         | Helix  | Helix  | 0.832 | 0.565 |
| 1h2w | QFTSFLSPGIY         | Strand | Strand | 1.52  | 1.04  |
| 1cpm | EFLGKDTTKVQ         | Strand | Strand | 0.79  | 0.536 |
| 1e6u | NLYGPHDNFHPNSHVIP   | Strand | Helix  | 1.9   | 1.74  |
| 1fo6 | MGMFICNDRRWPET      | Strand | Helix  | 1.85  | 1.3   |
| 1ew2 | AKKLQPAQTAANKLI     | Helix  | Strand | 2.11  | 1.8   |
| 1mj5 | WEALDLGDRVVL        | Helix  | Strand | 1.15  | 0.737 |
| 1eu8 | IGISKYSDNKAL        | Strand | Helix  | 1.23  | 0.8   |
| 1bys | RTDSNFPIQHDKVII     | Strand | Strand | 1.72  | 1.42  |
| 1hz4 | INEQHLEQLPMHE       | Helix  | Helix  | 1.36  | 1.06  |
| 1ks8 | YKIDTSRPGSDL        | Strand | Helix  | 1.59  | 1.04  |
| 1jtv | RLASDPSQSFKV        | Helix  | Strand | 1.04  | 0.666 |
| 2a0b | QQIQSPDLPAWED       | Helix  | Helix  | 1.06  | 0.85  |
| 1ixh | QIIANTVDFGA         | Helix  | Strand | 0.715 | 0.478 |
| 1p4o | IKTVNEAASMRE        | Strand | Helix  | 1.29  | 0.882 |
| 1jtv | ARERVTEGRVDVLV      | Helix  | Strand | 1.71  | 1.27  |
| 3cla | YTKFDVKNWVRREH      | Strand | Helix  | 1.74  | 1.22  |

|      |                     |        |        |       |       |
|------|---------------------|--------|--------|-------|-------|
| 1nte | TMHKDSTGHVGFIF      | Strand | Strand | 2.26  | 1.68  |
| 1a34 | EVSVQSGIAFKV        | Strand | Strand | 1.02  | 0.683 |
| 1jo0 | GLAHLNPVVML         | Helix  | Strand | 1.51  | 1     |
| 1nw1 | AKVHQLEVPIWKEPDYLC  | Helix  | Helix  | 2.29  | 2.05  |
| 3chb | DLCAEYHNTQI         | Helix  | Strand | 0.816 | 0.529 |
| 1e87 | SSMECEKNLYWI        | Strand | Strand | 1.42  | 0.967 |
| 7a3h | AMYTSSGGYIDDPSVKE   | Strand | Helix  | 2.6   | 2.14  |
| 1lbu | HVAGGDGRFWS         | Strand | Strand | 1.42  | 0.96  |
| 1ayl | ANVGEKGDVAV         | Strand | Strand | 0.485 | 0.319 |
| 1nw1 | CRLSEVYPPIRNEPNKVL  | Strand | Strand | 2.02  | 1.85  |
| 1p35 | LKSHDYTDKKS         | Helix  | Helix  | 1.38  | 0.896 |
| 2tnf | AVKSPCKDTPEGAELKPWY | Strand | Strand | 2.46  | 2.35  |
| 1cl2 | CSKILSKLGVTTTS      | Helix  | Strand | 0.998 | 0.809 |
| 1nyc | TSSKQGIGTSRPVY      | Strand | Strand | 2.04  | 1.66  |
| 1m1n | ETLFPLNKGISV        | Helix  | Strand | 1.41  | 0.934 |
| 1dqz | QFQGGGPHAVY         | Strand | Strand | 1.34  | 0.882 |
| 1am2 | LEAHRDPDAKA         | Helix  | Helix  | 0.794 | 0.526 |
| 7paz | IAVGDSPANLDQ        | Strand | Helix  | 1.51  | 0.985 |
| 1kmv | LVLSRELKEPPQGAHFLS  | Strand | Strand | 2.65  | 2.45  |
| 1jbe | LKELGFNNVEE         | Helix  | Strand | 1.18  | 0.765 |
| 1nnf | RLYFVRHQDPGALVSY    | Strand | Strand | 2.02  | 1.7   |
| 1usc | HFLGHTGVPIIL        | Strand | Strand | 0.573 | 0.372 |
| 1nof | TAYGSGVGQIGLSIMR    | Helix  | Strand | 1.96  | 1.65  |
| 1dj0 | QVANEPITVFC         | Helix  | Strand | 1.05  | 0.681 |
| 1rss | QAANQRPERRAAV       | Helix  | Helix  | 1.54  | 1.23  |
| 1g61 | IGKGTANKGTTSVGACIIA | Strand | Strand | 2.58  | 2.34  |

|      |                      |        |        |      |       |
|------|----------------------|--------|--------|------|-------|
| 1dfm | LAEYNVFDVPIRL        | Helix  | Strand | 1.56 | 1.23  |
| 1kv7 | LLTNGAIYPQHA         | Strand | Strand | 1.59 | 1.05  |
| 1k3x | VWFAFPQLKTYQS        | Strand | Helix  | 1.14 | 0.91  |
| 1jeo | KAKNINNNIIA          | Helix  | Strand | 1.09 | 0.72  |
| 1oew | TTPIDSLDDAYIT        | Strand | Strand | 1.47 | 1.13  |
| 1ofz | LQWGGSESAPPNIR       | Strand | Strand | 1.61 | 1.2   |
| 1qhd | RQEYAIPVGPVFPPGMNWTD | Helix  | Helix  | 2.73 | 2.63  |
| 1h2c | EFVLPPVQLPQYFTFD     | Helix  | Strand | 2.2  | 1.79  |
| 1hx0 | VFNNDDWQLSS          | Strand | Strand | 1.06 | 0.696 |
| 1gpp | IECIENIEVGKVM        | Strand | Strand | 1.66 | 1.16  |
| 1a8e | DAYLAPNNLKP          | Helix  | Strand | 1.8  | 1.18  |
| 1kwf | TVAVKDSEYYGYGN       | Helix  | Helix  | 2.14 | 1.74  |
| 1jig | LATSSVNEGTSKESAE     | Helix  | Helix  | 1.94 | 1.61  |
| 1taf | ANHARKKTIDLDD        | Helix  | Helix  | 1.76 | 1.43  |
| 1htw | LQGIGHQGNVKSPTYTLVEE | Helix  | Strand | 2.41 | 2.27  |
| 1kqr | EGTNNTDRWLA          | Strand | Strand | 1.31 | 0.878 |
| 1b4u | YLAEFDDIPGTRVFTAQR   | Helix  | Helix  | 2.07 | 1.83  |
| 1h2w | QYIVGRSRKQNNPLLI     | Helix  | Strand | 1.99 | 1.68  |
| 1by2 | CRALGFENATQ          | Helix  | Strand | 1.55 | 0.99  |
| 1lri | TDSGYSMLTAKALPTTAQ   | Helix  | Helix  | 1.98 | 1.84  |
| 1p5f | VILAKGAEEME          | Strand | Helix  | 1.35 | 0.919 |
| 1d5t | IIPQNQVNRKSDIYV      | Strand | Strand | 2.02 | 1.66  |
| 1r5l | IFDLEGWQFSH          | Strand | Helix  | 1.23 | 0.821 |
| 1qdd | IKESGTDDFNVW         | Helix  | Strand | 1.31 | 0.855 |
| 1id0 | SLDISPEISFV          | Strand | Strand | 1.09 | 0.731 |
| 1gwe | VGNNTPIFFLRDPMKFTH   | Strand | Helix  | 2.67 | 2.37  |

|      |                    |        |        |       |       |
|------|--------------------|--------|--------|-------|-------|
| 1l3l | YFDKKFEALDPVV      | Helix  | Helix  | 1.14  | 0.891 |
| 1oz3 | LHFDGYSECHDFWV     | Strand | Strand | 1.65  | 1.21  |
| 1aox | ATSQTSQYGGDLTNTFG  | Helix  | Helix  | 2.16  | 1.75  |
| 1o1x | VLPGRLLIGAEI       | Strand | Helix  | 1.33  | 0.85  |
| 2pvb | AKVGLASKSLDD       | Helix  | Helix  | 0.858 | 0.569 |
| 1fp2 | ASELLVRGSDLCLAPM   | Helix  | Helix  | 2.09  | 1.78  |
| 1gkl | AIMNGELEPLIV       | Helix  | Strand | 0.97  | 0.633 |
| 1m2x | QVYYPGKGHTADNVVVW  | Strand | Strand | 2.17  | 1.78  |
| 1o08 | IALASASKNGPF       | Strand | Helix  | 1.66  | 1.07  |
| 1qlw | VTSETLSLSPKYDAHGTV | Strand | Strand | 2.14  | 1.96  |
| 1fsg | RLKAVGPKSMR        | Helix  | Strand | 0.887 | 0.593 |
| 1odm | YQDIEADDTGYLI      | Strand | Strand | 1.74  | 1.36  |
| 1mnn | TQLNEDGTTSN        | Strand | Strand | 0.687 | 0.439 |
| 1dqt | LTIQGLRAVDTGLY     | Strand | Strand | 1.77  | 1.25  |
| 1o26 | AARVSFDMGLKDEER    | Helix  | Helix  | 2.35  | 1.94  |
| 1qwn | ERTTLTFLQMLE       | Strand | Strand | 1.72  | 1.15  |
| 1qwn | LSAWHSWDGMARIEE    | Helix  | Helix  | 1.37  | 1.16  |
| 1cv8 | IIWNPWDNGFMTQ      | Strand | Strand | 1.65  | 1.32  |
| 1fg7 | LRTLKAFALAGLRGFT   | Strand | Strand | 2.24  | 2.01  |
| 1ear | AIKLENSGTLRYGDVL   | Strand | Strand | 2     | 1.68  |
| 1ijy | VEIQCSPLDKF        | Helix  | Helix  | 0.916 | 0.585 |
| 1r5r | LGLLPDQLQER        | Helix  | Helix  | 0.727 | 0.493 |
| 1em2 | VLKSASNPRVCTF      | Strand | Strand | 0.771 | 0.617 |
| 1i0i | CVSSYGEGLTSSGQVRML | Strand | Strand | 2.19  | 2.03  |
| 2rsp | IISEEDWPTDWPVME    | Strand | Strand | 1.71  | 1.44  |
| 1f86 | FRKAADDTWEP        | Strand | Strand | 1.47  | 0.938 |

|      |                      |        |        |       |       |
|------|----------------------|--------|--------|-------|-------|
| 1df9 | NGVVTRSGAYVSA        | Strand | Strand | 1.5   | 1.2   |
| 1p35 | VIVPFAHEINDTGLYEY    | Strand | Strand | 2.21  | 1.81  |
| 2pvb | ELKLFLQNFSPSARALTDAE | Helix  | Helix  | 2.54  | 2.42  |
| 1ak0 | IGDMTQPLHDEAYAV      | Helix  | Helix  | 1.8   | 1.53  |
| 2pth | ISKLGNNPNFHRL        | Helix  | Strand | 1.35  | 1.04  |
| 1jhs | FIDASTLREVPDTQAV     | Strand | Strand | 2.01  | 1.66  |
| 1fg7 | YVCSPNNPTGQLINPQD    | Strand | Helix  | 2.39  | 1.99  |
| 1p35 | VTSALNKNVIL          | Strand | Strand | 0.809 | 0.549 |
| 1h2w | AELSDDGRYVL          | Strand | Strand | 0.962 | 0.624 |
| 1hyo | HHSVNGCNLRPGDLLA     | Helix  | Strand | 1.97  | 1.66  |
| 1h2w | YCDLQQESNGITGILKWWKL | Strand | Strand | 2.1   | 1.96  |
| 1pzt | FLSINGFPNNYWGAGGEDD  | Helix  | Helix  | 2.68  | 2.35  |
| 1e6b | YIPVNLLKGDQFDSDF     | Strand | Helix  | 2.28  | 1.87  |
| 1o1x | VEDHGTYSEESVDYPD     | Strand | Helix  | 1.84  | 1.55  |
| 1mfm | IEDSVISLSGDHSIIGRTL  | Strand | Strand | 2.49  | 2.37  |
| 1of4 | EEVDFSSPEEVKNWWN     | Strand | Strand | 2.03  | 1.65  |
| 1g6x | FVYGGCRAKRNNFKSAED   | Strand | Helix  | 2.43  | 2.25  |
| 1g2q | VRKAGKLPGECK         | Strand | Strand | 1.42  | 1.12  |
| 3mag | LKWRCFPDQWIKDFYI     | Strand | Strand | 1.88  | 1.56  |
| 1kwa | TLKMNELNHCI          | Strand | Strand | 1.09  | 0.723 |
| 1dos | KANEAYLQGQLGN        | Helix  | Strand | 1.83  | 1.47  |
| 1pdo | FLVDTWGGSPF          | Strand | Helix  | 0.73  | 0.466 |
| 1mfm | AVLKGDPVQGI          | Strand | Strand | 1.43  | 0.919 |
| 1hju | GVSFYFPYSSATLSA      | Strand | Helix  | 2.09  | 1.7   |
| 1jh6 | KNHFNCSTTTPYMPHLS    | Helix  | Strand | 2.27  | 1.87  |
| 1hd2 | LNVEPDGTGLTCSLAPN    | Strand | Helix  | 1.9   | 1.56  |

|      |                     |        |        |       |       |
|------|---------------------|--------|--------|-------|-------|
| 1m9z | CSCSSDECNDNII       | Strand | Strand | 1.67  | 1.34  |
| 1yac | FVVTDASGTFNEIT      | Strand | Helix  | 1.82  | 1.35  |
| 1kv7 | WGYNGNLLGPAVK       | Strand | Strand | 1.79  | 1.4   |
| 1ako | GLQETKVHDDMFPLEE    | Strand | Helix  | 2.02  | 1.72  |
| 1qs1 | STSLSSERLAAFGRKIIIL | Strand | Strand | 2.84  | 2.52  |
| 1knm | CLDVPDASTSDGTQLQLW  | Strand | Strand | 2.21  | 1.98  |
| 1kwa | FQKNTDEPMGITL       | Strand | Strand | 1.57  | 1.23  |
| 1eaj | KIYDDYYPDLKGRVHF    | Strand | Strand | 2.14  | 1.8   |
| 1mla | EAAEGQVVSP          | Helix  | Strand | 1.26  | 0.856 |
| 1bqc | LINIGNEPYGNDSAT     | Strand | Helix  | 2.02  | 1.72  |
| 1ix9 | FWKGLKKGTTLQGDL     | Helix  | Helix  | 2.03  | 1.74  |
| 1ixh | KNNVGTGSTVKWPIGLGG  | Helix  | Strand | 2.21  | 1.98  |
| 1h2w | TDYGCSDSKQH         | Helix  | Helix  | 1.83  | 1.17  |
| 1i7e | FALRPAPQGITIKC      | Helix  | Strand | 1.92  | 1.43  |
| 1c5e | LMLDTSSRKLVA        | Strand | Strand | 1.26  | 0.847 |
| 1tl2 | LFFHPNGYLYA         | Strand | Strand | 0.574 | 0.39  |
| 1k3i | WSSYRNDAFGGSPGGITL  | Strand | Strand | 2.09  | 1.89  |
| 1lc5 | LRSLTKFYAIPGLRLGYL  | Strand | Strand | 1.85  | 1.7   |
| 1oc7 | YEDAGKPRAVRG        | Helix  | Strand | 1.49  | 0.97  |
| 1jks | LLSGASPFLGDTKQE     | Helix  | Helix  | 2.17  | 1.79  |
| 1dci | SDILQPPGDDVAR       | Helix  | Helix  | 1.37  | 1.08  |
| 1b5e | QQVASSKGEINSNYGW    | Helix  | Helix  | 2.23  | 1.85  |
| 1jm1 | ALTGQQITEIP         | Helix  | Strand | 0.703 | 0.47  |
| 1moq | TLSQSGETADT         | Strand | Helix  | 1.21  | 0.799 |
| 1qwn | FLWRQIWDNKGDTALFT   | Strand | Strand | 2.07  | 1.68  |
| 1hju | IHLDNGWDWGT         | Strand | Helix  | 1.73  | 1.1   |

|       |                      |        |        |       |       |
|-------|----------------------|--------|--------|-------|-------|
| 1gyc  | VLNANQTVGNYW         | Strand | Strand | 1.83  | 1.25  |
| 1c5e  | KKRTAFAGTAIS         | Helix  | Strand | 1.55  | 1.03  |
| 1je1  | LTNENRGFLVYT         | Strand | Strand | 1.23  | 0.799 |
| 1k4i  | MLAAPDAQPSHFRR       | Helix  | Strand | 1.53  | 1.11  |
| 1bqc  | GEFGHDHSDGNPDEDT     | Strand | Helix  | 2.34  | 1.95  |
| 1lok  | TAWLPQVDASQ          | Helix  | Helix  | 1.17  | 0.797 |
| 1cqy  | QSWNPVPLKTTTSH       | Strand | Strand | 1.73  | 1.21  |
| 1em2  | QILAQEENWKFE         | Helix  | Strand | 1.06  | 0.724 |
| 1ao3  | ILVTDVSVDSVDAA       | Strand | Helix  | 2.05  | 1.5   |
| 1fj2  | KTLVNPANVTF          | Helix  | Strand | 0.902 | 0.594 |
| 1oz3  | LEEQKAITAPVSLFQDSQ   | Helix  | Helix  | 2.14  | 1.9   |
| 1e9g  | LEITKEETLNPIHQ       | Strand | Strand | 1.57  | 1.12  |
| 1vcc  | KLFTDNNFLNPVSDDNPAYE | Strand | Helix  | 2.4   | 2.24  |
| 1p4o  | MANNPVLAPPSLSK       | Helix  | Helix  | 1.69  | 1.2   |
| 1i1w  | LLASAGTPEVA          | Helix  | Strand | 0.899 | 0.592 |
| 1o08  | VKMIQDVSPADVYPGILQ   | Helix  | Helix  | 2.24  | 2.01  |
| 1qks  | YVDATLNPEAEI         | Strand | Helix  | 1.62  | 1.09  |
| 1l2l  | EASIRKVRGVLL         | Helix  | Strand | 1.43  | 0.959 |
| 1n xm | ISVADGGKVLG          | Strand | Strand | 1.68  | 1.09  |
| 1c5e  | GTFRYEDVLWPEAASDETK  | Strand | Helix  | 2.38  | 2.08  |
| 1nc5  | MNTYTVEELPPANRWHYHQ  | Helix  | Helix  | 2.84  | 2.49  |
| 1k3i  | VFQASSYTAPQPGLGRWG   | Strand | Strand | 2.66  | 2.36  |
| 3tss  | LIIFSPYYSPAFTKGEKVD  | Strand | Strand | 2.42  | 2.33  |
| 7a3h  | HFYAGTHGQNL          | Strand | Helix  | 1.46  | 0.993 |
| 1jfb  | IRTNGSSTARE          | Helix  | Helix  | 0.907 | 0.597 |
| 1lk9  | TKNTEGTPRET          | Helix  | Helix  | 1.57  | 1     |



|      |                       |        |        |       |       |
|------|-----------------------|--------|--------|-------|-------|
| 1j53 | TETTGMINQIGAHYEGHKIIE | Strand | Strand | 2.46  | 2.27  |
| 1gwe | RSQKRLPDSGLRDATM      | Helix  | Helix  | 1.53  | 1.24  |
| 1ew2 | LSKTYNVDKHVPDSGA      | Strand | Helix  | 2.05  | 1.75  |
| 1otf | NSLDAPLERVRVL         | Helix  | Strand | 1.48  | 1.18  |
| 1lug | KGGPLDGTYRL           | Strand | Strand | 1.48  | 0.963 |
| 1j83 | VIAPTPVNVSI           | Strand | Strand | 1.42  | 0.935 |
| 1i24 | AGSKLGLDVKKMT         | Helix  | Strand | 1.4   | 1.12  |
| 1a6m | HSRHPGDFGADA          | Helix  | Helix  | 0.525 | 0.337 |
| 1byi | LVEGAGGWFTPLS         | Strand | Strand | 1.7   | 1.36  |
| 1dqz | VYLLDGLRAQDDYNGWD     | Strand | Helix  | 1.99  | 1.62  |
| 1d8i | CVFTELDAHLT           | Strand | Strand | 1.28  | 0.856 |
| 1oc7 | LVIEPDSLAM            | Strand | Helix  | 1.41  | 0.911 |
| 1e6u | WLENTQPMLSHINV        | Helix  | Strand | 1.68  | 1.21  |
| 1llf | TAKLANGDTIT           | Strand | Strand | 0.417 | 0.283 |
| 1gyx | RHLNSKDSSISIA         | Helix  | Strand | 1.81  | 1.45  |
| 1uhn | QLYDLKQQGFIERQE       | Helix  | Helix  | 1.66  | 1.4   |
| 1ld8 | GILQDRGLSKYPNL        | Helix  | Helix  | 1.74  | 1.28  |
| 1lj9 | QVALQGLSEVE           | Helix  | Helix  | 0.8   | 0.511 |
| 1ako | SFNINGLRARPHQ         | Strand | Helix  | 1.68  | 1.36  |
| 1bqc | VVDAPNWDGQDWTNTMR     | Strand | Helix  | 2.21  | 1.8   |
| 1qwn | LEFVTGGWVMPDEANSHWRN  | Strand | Helix  | 2.36  | 2.25  |
| 2igd | ANDNGVDGVWT           | Helix  | Strand | 1.31  | 0.874 |
| 1mdz | KAIIPVHYAGAPADLDA     | Strand | Helix  | 2.18  | 1.79  |
| 1qz5 | AGFAGDDAPRAVF         | Strand | Strand | 1.22  | 0.94  |
| 1dqe | STKLNMLDPEGNLHHGN     | Helix  | Helix  | 2.25  | 1.85  |
| 1n55 | QAKLRNPKYVI           | Helix  | Strand | 0.842 | 0.546 |

|      |                      |        |        |       |       |
|------|----------------------|--------|--------|-------|-------|
| 3seb | NVKSIDQFLYFDLI       | Strand | Strand | 2.11  | 1.48  |
| 1nf9 | YTAQPGSMTEEQ         | Strand | Helix  | 1.27  | 0.868 |
| 1id0 | AGESMLGGARM          | Strand | Strand | 1.17  | 0.769 |
| 1p35 | VIFPVEIDVSQ          | Strand | Strand | 1.3   | 0.855 |
| 1ug6 | RALADRVPFFA          | Helix  | Strand | 0.998 | 0.637 |
| 1h2w | FLYGYGGFNISITPNYSVSR | Strand | Helix  | 3     | 2.76  |
| 2rsp | ALLDSGADITIIS        | Strand | Strand | 1.46  | 1.12  |
| 1at0 | LVRDVETGELRP         | Strand | Strand | 1.02  | 0.677 |
| 1oc7 | LISFSDVRTIL          | Helix  | Strand | 1.02  | 0.67  |
| 1gvd | VIAKHLKGRIGKQ        | Helix  | Helix  | 1.07  | 0.826 |
| 1k94 | TQSGINGTYSFSLT       | Helix  | Helix  | 2.02  | 1.72  |
| 1fit | VCPLRPVERFHDLRPDE    | Strand | Helix  | 2.4   | 1.97  |
| 1k04 | DETIPLLPAST          | Helix  | Helix  | 1.4   | 0.919 |
| 1fw9 | WLLEDSMTKR           | Helix  | Helix  | 1.46  | 0.959 |
| 1m9z | KEKKKPGETFF          | Strand | Strand | 0.656 | 0.445 |
| 1r3f | AGHTGALDPLATGM       | Strand | Strand | 1.76  | 1.27  |
| 1o50 | TVVEEDTPIEE          | Strand | Helix  | 1.47  | 0.952 |
| 1br9 | IVPWDTLSTTQ          | Strand | Helix  | 1.44  | 0.948 |
| 1a34 | EGRASNINTRASVG       | Strand | Strand | 2.28  | 1.7   |
| 1yac | ELHRDWRNDIAG         | Helix  | Helix  | 1.58  | 1.01  |
| 1kv7 | TLNVDQPAATC          | Strand | Strand | 1.67  | 1.13  |
| 1h2w | HVDTKAGHGAGKPTAK     | Strand | Helix  | 2.32  | 1.93  |
| 1otk | TRLMESRDPQL          | Helix  | Helix  | 0.848 | 0.575 |
| 3cla | SLDDSAKYFYP          | Helix  | Helix  | 0.675 | 0.445 |
| 1o97 | VSVGPDVRDES          | Strand | Helix  | 1.68  | 1.07  |
| 1kli | YSLLDGVSTP           | Strand | Strand | 1.3   | 0.873 |

|      |                      |        |        |       |       |
|------|----------------------|--------|--------|-------|-------|
| 1bdy | WLDLQPQAKVL          | Strand | Strand | 1.36  | 0.922 |
| 1lc5 | RWSLREADGWQLTDAILE   | Strand | Helix  | 2.28  | 2.11  |
| 1qau | EQSGLIQAGDIIL        | Helix  | Strand | 1.29  | 0.992 |
| 1fcq | YWNVPTFMCHKYGLRFEEVS | Strand | Helix  | 2.07  | 1.99  |
| 1gp0 | LVYKDGSPCPSKSGLSYKSV | Strand | Strand | 2.38  | 2.24  |
| 3chb | IITFKNGATFQ          | Strand | Strand | 0.506 | 0.338 |
| 1iv3 | RLMRLPQDRIGL         | Helix  | Strand | 1.27  | 0.87  |
| 1mla | LVCAGVIDFAD          | Helix  | Helix  | 0.558 | 0.357 |
| 1n8k | LLRSGESIRTI          | Helix  | Strand | 0.949 | 0.606 |
| 1byi | YTFAEPTSPHI          | Strand | Helix  | 1     | 0.68  |
| 1gci | LKNTATSLGSTNL        | Helix  | Helix  | 1.48  | 1.14  |
| 1ds1 | LAARLPRTPRADLYA      | Helix  | Helix  | 1.36  | 1.14  |
| 1qhd | NWNFDFGLLGTTLLNLDANY | Strand | Helix  | 2.56  | 2.44  |
| 1h97 | HMLKEISNDAE          | Helix  | Helix  | 0.889 | 0.603 |
| 1qst | LAVTANEQVRGYGT       | Strand | Helix  | 1.86  | 1.33  |
| 1bea | RTCGIGPRLPWPE        | Helix  | Helix  | 1.75  | 1.41  |
| 1nw1 | AHISLSKSPVTF         | Helix  | Strand | 1.13  | 0.74  |
| 1ufv | EALRAVPEFRKD         | Helix  | Strand | 0.889 | 0.58  |
| 1fp2 | SILQVPSSKIGN         | Helix  | Helix  | 1.07  | 0.689 |
| 1pgs | VKNAFGDGLSQSAE       | Strand | Strand | 1.54  | 1.13  |
| 1el6 | SQLAKGFYEPNIES       | Helix  | Helix  | 0.958 | 0.693 |
| 1nf9 | LLTKWRYSAFFHSDLLQ    | Strand | Helix  | 2.21  | 1.89  |
| 1k3x | AAIKGKPLTDVW         | Helix  | Strand | 1.25  | 0.806 |
| 1n7o | LLSDAGVASVPRTSYLS    | Helix  | Strand | 2.31  | 1.97  |
| 1lqt | ESLRPRGIQEVV         | Helix  | Strand | 1.41  | 0.962 |
| 1omr | SLYDVDGNGTISKNE      | Helix  | Helix  | 1.69  | 1.37  |

|      |                      |        |        |       |       |
|------|----------------------|--------|--------|-------|-------|
| 1dj0 | VNANLPGDIAV          | Helix  | Strand | 0.61  | 0.414 |
| 1h2w | AVANIRGGGEYGET       | Strand | Helix  | 1.81  | 1.31  |
| 1onw | LTGAYHVPSRTITGSVEK   | Strand | Helix  | 2.87  | 2.63  |
| 1usc | ASFHPFGQKDL          | Strand | Helix  | 1.16  | 0.741 |
| 1tl2 | LFFDPNGYLYA          | Strand | Strand | 1.02  | 0.65  |
| 1lk9 | ISLSPNMTATPDAPESKV   | Helix  | Strand | 1.91  | 1.71  |
| 1iuj | NRIPVRPEYAEQ         | Strand | Helix  | 1.12  | 0.763 |
| 1hqk | ELARKEDIDAVI         | Helix  | Strand | 1.42  | 0.928 |
| 1at0 | TALLESQVRKP          | Strand | Strand | 0.759 | 0.515 |
| 1ogo | IEYFTKQNFYA          | Strand | Strand | 1.15  | 0.768 |
| 1n8k | TEMSNGGVDFSF         | Helix  | Strand | 1.56  | 1.01  |
| 1o7j | YAGMGAGSVSVRG        | Strand | Helix  | 1.53  | 1.21  |
| 1jhj | WSLSSCKPGFGVDQL      | Strand | Helix  | 1.58  | 1.32  |
| 1k3i | FTIGGSWSGGVFEKNGEV   | Strand | Strand | 2.13  | 1.97  |
| 1dcs | ARECGFDVSLDGETAT     | Helix  | Strand | 2.01  | 1.72  |
| 1e6u | RQLEQRGDVEL          | Helix  | Strand | 0.567 | 0.362 |
| 1qv1 | KWARNEPTLIR          | Helix  | Helix  | 0.735 | 0.491 |
| 1oqv | ADLGDFENSAAAAETGVGVI | Helix  | Strand | 2.82  | 2.65  |
| 1dos | AATGKPLFSSHM         | Helix  | Strand | 1.06  | 0.689 |
| 1g64 | IITGRGCHRDI          | Strand | Helix  | 1.32  | 0.897 |
| 7a3h | QWYGQFVNYES          | Helix  | Helix  | 1.3   | 0.87  |
| 1nof | GGHLYGTTPKPYPLA      | Strand | Helix  | 2.24  | 1.84  |
| 1ie9 | RCRHPPPGSHLLYA       | Helix  | Helix  | 1.35  | 0.973 |
| 1cnv | IGQVLPYLPDLQT        | Helix  | Helix  | 0.979 | 0.764 |
| 1g2q | HQYPNFPSEGILFED      | Strand | Strand | 1.59  | 1.29  |
| 8abp | VICTPDPKLGSA         | Strand | Helix  | 1.57  | 1.02  |

|      |                     |        |        |       |       |
|------|---------------------|--------|--------|-------|-------|
| 1mpx | TFVTEPLTEPLQI       | Strand | Strand | 1.47  | 1.16  |
| 1gxu | FIWSALPTEFTI        | Strand | Strand | 1.99  | 1.34  |
| 1qw9 | YCNHPSGSYYYS        | Helix  | Helix  | 1.22  | 0.782 |
| 1muw | DATGMTVPMAT         | Helix  | Strand | 1.04  | 0.693 |
| 1a6q | DIERSEEDDQF         | Strand | Strand | 1.18  | 0.791 |
| 1mka | VKFTGQVLPTAKKVT     | Strand | Strand | 1.79  | 1.45  |
| 1lc5 | LRCEREDIDLQR        | Strand | Helix  | 0.959 | 0.626 |
| 1oz3 | VHFDNWDDTYDYWC      | Strand | Strand | 1.82  | 1.28  |
| 1ubk | SRILPKAQAVI         | Helix  | Strand | 0.772 | 0.524 |
| 1lqt | ADTTEDLDMAV         | Helix  | Strand | 1.23  | 0.811 |
| 1nw1 | WKTVPLEHLRI         | Helix  | Strand | 1.12  | 0.729 |
| 1iqz | YDYDEDGIAYV         | Strand | Strand | 0.897 | 0.582 |
| 1gp0 | LFDLSSLSGRAGFTA     | Strand | Strand | 2.22  | 1.87  |
| 1k3i | LFGWKKGSVFQ         | Strand | Strand | 0.927 | 0.601 |
| 1mj5 | TLSWPRQIPIAGTPADV   | Helix  | Helix  | 2.21  | 1.86  |
| 1e1a | WGHIPGTHEGGAD       | Strand | Strand | 1.76  | 1.42  |
| 1cpm | VNFTNDGKLLK         | Strand | Strand | 0.627 | 0.419 |
| 1je1 | TGALVPYINLGEYII     | Strand | Strand | 1.92  | 1.58  |
| 1ezj | QEFESSRDASY         | Helix  | Helix  | 0.785 | 0.517 |
| 1mol | NKIGQYGRLTFNK       | Helix  | Strand | 1.5   | 1.19  |
| 1pgs | NIQLPTNTEKAY        | Strand | Strand | 1.02  | 0.684 |
| 1eom | AATGYNGWYSGSMAATPAF | Helix  | Helix  | 2.82  | 2.56  |
| 1eif | SVSKPGKGAKAR        | Strand | Strand | 1.22  | 0.783 |
| 1ls1 | LVAADTQRPA          | Strand | Helix  | 0.942 | 0.62  |
| 1k3i | SFQVPSDSGVALPGYW    | Strand | Strand | 2.43  | 2.02  |
| 1ayl | YAKTIKLSKEAEPEI     | Strand | Helix  | 1.26  | 1.06  |

|      |                   |        |        |       |       |
|------|-------------------|--------|--------|-------|-------|
| 1el6 | QTVTLDNQQTPTVF    | Strand | Strand | 1.79  | 1.27  |
| 1n8k | SAVKVAKVTQGSTCA   | Helix  | Strand | 1.91  | 1.63  |
| 1ls1 | AIGRLRGRGRITEED   | Helix  | Helix  | 1.69  | 1.44  |
| 1k92 | IWGDGSTYKGN DIE   | Strand | Helix  | 1.81  | 1.34  |
| 2pth | HDELDLPPGVAKF     | Strand | Strand | 1.14  | 0.92  |
| 1qw9 | SVETNEIGLNE       | Strand | Helix  | 1.02  | 0.692 |
| 1iib | VLLGPQIAYMLPE     | Strand | Helix  | 1.86  | 1.5   |
| 1mml | EVNKRVEDIHPTVNPYN | Helix  | Helix  | 1.95  | 1.74  |
| 1dok | RRITSSKCPKEAVI    | Strand | Strand | 1.53  | 1.09  |
| 1ldd | KITVPKDWGYNRITLQQ | Helix  | Helix  | 1.89  | 1.61  |
| 1pfb | VKWKGWNQRYNTWE    | Strand | Strand | 1.49  | 1.05  |
| 1ew4 | RLDDWDGDSIDICE    | Helix  | Strand | 1.47  | 1.08  |
| 1jks | CREKSTGLQYA       | Strand | Strand | 1.04  | 0.677 |
| 1ezm | NRYYYWTATSNYNS    | Helix  | Helix  | 1.7   | 1.33  |
| 1cc8 | VLTKLEPDVSK       | Helix  | Strand | 0.984 | 0.648 |
| 1lkf | IKDKSYDKDTL       | Strand | Strand | 1.23  | 0.785 |
| 1d3b | IEAEDNMNCQM       | Strand | Strand | 1.36  | 0.921 |
| 2lis | LKDKNMIPKYLPYM    | Helix  | Helix  | 1.19  | 0.883 |
| 1gwe | FWTNNPESAHQ       | Helix  | Helix  | 0.79  | 0.528 |
| 1jyk | VEELEGNSIYE       | Strand | Strand | 0.977 | 0.653 |
| 2nlr | SYGFVDGAVYN       | Strand | Strand | 1.28  | 0.858 |
| 1e42 | VWLPAVKAKGLEI     | Strand | Strand | 1.56  | 1.27  |
| 1g2b | VKKLDSGTGKELVL    | Strand | Strand | 1.59  | 1.11  |
| 1hzt | YELGVEITPPESI     | Helix  | Strand | 1.71  | 1.34  |
| 1m1n | IGDYNIGGDAWSS     | Strand | Helix  | 1.12  | 0.908 |
| 1by2 | GTVCDNLWDLTD      | Strand | Helix  | 1.26  | 0.808 |

|      |                      |        |        |       |       |
|------|----------------------|--------|--------|-------|-------|
| 1ew2 | ASLDPSVTHLM          | Helix  | Strand | 1.12  | 0.716 |
| 1m2i | VYDLTKFLEEHPGGEAVL   | Strand | Helix  | 2.13  | 1.93  |
| 1fdr | STIGLPMNKETSHV       | Helix  | Strand | 1.58  | 1.13  |
| 1ji3 | NQWVQASPNTYYL        | Helix  | Strand | 1.54  | 1.18  |
| 1k3i | YLSSDGTNWGSPVASG     | Strand | Strand | 2     | 1.64  |
| 1gwe | FISQQGVHNLNDE        | Strand | Helix  | 1.96  | 1.38  |
| 1jlx | VIDWKSIFQFPKGYVTF    | Strand | Strand | 2.47  | 2.11  |
| 1qs1 | DALGKKPIPENITV       | Helix  | Strand | 1.76  | 1.23  |
| 1ew2 | ARQEGCQDIAT          | Helix  | Helix  | 1.43  | 0.927 |
| 3cla | QAVNQFDELRMAI        | Helix  | Strand | 0.892 | 0.705 |
| 1hfe | DAKFPVRASQDNTQV      | Helix  | Helix  | 1.61  | 1.3   |
| 1hxx | INMASVSSWLPSEQYAGY   | Strand | Helix  | 2.26  | 2.1   |
| 1jl7 | HRIGGKMNAAA          | Helix  | Helix  | 1.13  | 0.72  |
| 1jyk | LKEKGINDIII          | Helix  | Strand | 0.553 | 0.375 |
| 1pkh | IYDDEVYDLSKELNYKR    | Strand | Strand | 2.11  | 1.87  |
| 1gci | KQKNPSWSNVQ          | Helix  | Helix  | 0.773 | 0.494 |
| 1tul | AQINSEDEVLD          | Strand | Strand | 1.39  | 0.936 |
| 1n7o | SQAHKQNGDSY          | Strand | Strand | 1.29  | 0.837 |
| 1g8a | AIMNGLKNFPIKPGKSVL   | Helix  | Strand | 2.23  | 2.06  |
| 1kgs | RRKSESKSTKLV         | Helix  | Strand | 1.47  | 0.946 |
| 1o08 | VLFDLDGVITDTAE       | Strand | Helix  | 1.78  | 1.25  |
| 1pgs | AKSNTPI SAPVVT       | Strand | Strand | 1.27  | 1.03  |
| 1nls | NLELTRVSSNGSPQGSSVGR | Strand | Strand | 2.86  | 2.69  |
| 1ifr | EEVDEEGKFVR          | Strand | Strand | 1.2   | 0.8   |
| 1jks | FIRLLVKDPKKRMTIQD    | Helix  | Helix  | 2.06  | 1.89  |
| 1hdo | VLVRDSSRLPSEGPRPAHVV | Strand | Strand | 2.31  | 2.2   |

|      |                      |        |        |       |       |
|------|----------------------|--------|--------|-------|-------|
| 2pth | GFVLGKPPVSE          | Helix  | Helix  | 0.899 | 0.583 |
| 1kmz | YRKLGV EIPAEADSAPHTE | Helix  | Strand | 2.22  | 2.01  |
| 1j0p | AMHDKG TKFKSCVG      | Helix  | Helix  | 1.34  | 0.942 |
| 1g66 | FGARETTASPGYGSSSTV   | Strand | Helix  | 2.64  | 2.37  |
| 1jlx | QNYTVGGSFVSYLF       | Strand | Strand | 1.86  | 1.31  |
| 1k3i | VFQAGPSTAMN          | Strand | Strand | 1.09  | 0.694 |
| 1hqk | IVRHGGREEDITL        | Helix  | Strand | 0.964 | 0.743 |
| 1ds1 | TGYRELRSGTVYHDV      | Strand | Strand | 1.83  | 1.5   |
| 3pvi | ALKHGINDIFQNGGK      | Helix  | Helix  | 2.01  | 1.63  |
| 1cfz | LRFTGEFPK KLT        | Helix  | Strand | 0.924 | 0.622 |
| 1n3l | AYLDNMKAPWEL         | Helix  | Helix  | 0.641 | 0.425 |
| 1fsg | VEKRTDRSNLKGDFVG     | Strand | Strand | 1.9   | 1.6   |
| 1o4t | RISNMRGGKGEVE        | Strand | Strand | 1.49  | 1.21  |
| 1f8e | IRGRPKEDKVWWT SN     | Strand | Strand | 2.03  | 1.65  |
| 1is3 | ERSKKFPFTKGDHFQ      | Strand | Strand | 1.7   | 1.4   |
| 1jm1 | VIVSSESDPGLY         | Strand | Strand | 0.808 | 0.527 |
| 1fye | EVLAPLGVNVT          | Helix  | Strand | 0.933 | 0.615 |
| 1jnr | GFSVREPKFYV          | Strand | Strand | 1.37  | 0.93  |
| 1o4y | DCENQTDWRPAATQEE     | Strand | Helix  | 2.04  | 1.66  |
| 1l7a | QLQTYKPEKTAPKDFSE    | Helix  | Helix  | 2.23  | 1.81  |
| 1oqq | VYVNEAFTDKVPAANERE   | Strand | Helix  | 2.55  | 2.33  |
| 1eom | IQLQSYGANVSR         | Strand | Helix  | 1.39  | 0.935 |
| 1jnr | EIMDGNQPIYM          | Helix  | Strand | 0.916 | 0.612 |
| 1r5r | DVDKGNLVNEPSI        | Helix  | Helix  | 1.65  | 1.31  |
| 1omr | MTSAGKTNQKLEW        | Helix  | Helix  | 1.5   | 1.19  |
| 1qnr | IIPFVN NWS DYGGIN    | Strand | Helix  | 1.4   | 1.19  |



|      |                      |        |        |       |       |
|------|----------------------|--------|--------|-------|-------|
| 1i0v | HEDGETVGSNSYPHKY     | Helix  | Strand | 1.92  | 1.6   |
| 1jmk | CAFDFIEEEDRLD        | Strand | Helix  | 1.51  | 1.18  |
| 1m1n | VPVRCEGFRGVSQL       | Strand | Helix  | 1.94  | 1.57  |
| 1ogo | IGASPFYASGMSPDSR     | Strand | Strand | 1.9   | 1.58  |
| 1p4o | FVMEGGLLDKPDNCPDML   | Helix  | Helix  | 2.27  | 2.03  |
| 1r3f | LDKPQGMSSND          | Strand | Helix  | 1.02  | 0.68  |
| 1oc7 | LEARGFPAQFI          | Helix  | Strand | 0.858 | 0.582 |
| 1e1a | CAFDYEGNLWI          | Strand | Strand | 0.603 | 0.391 |
| 1lqp | LSREPQYGGPAADYTHYA   | Strand | Strand | 2.79  | 2.5   |
| 1n1p | IRQTKDGGYAL          | Strand | Strand | 1.28  | 0.816 |
| 1pdo | MLLGEQENVGW          | Helix  | Strand | 1.17  | 0.797 |
| 1ogo | VIHTRYIKSETVVPSAII   | Strand | Strand | 2.35  | 2.1   |
| 1mpx | LTEHAAAYDAFW         | Helix  | Helix  | 1.1   | 0.702 |
| 1lo7 | QQRIEFGDCDPAGIVWYPNY | Strand | Helix  | 2.67  | 2.57  |
| 1opd | LQTLGLTQGTVVVT       | Helix  | Strand | 1.88  | 1.47  |
| 1gv9 | RVTGRGRIGADGLA       | Strand | Strand | 1.89  | 1.39  |
| 1qnr | KNVQIKSLDFGTF        | Helix  | Strand | 1.81  | 1.4   |
| 1m15 | STLSSMEDELKGTY       | Helix  | Strand | 1.58  | 1.11  |
| 1me4 | RIAKGSNQCLVKEEASS    | Strand | Strand | 2.1   | 1.79  |
| 1dqz | ASLSGFLNPSESWWPT     | Strand | Helix  | 2     | 1.69  |
| 1xer | INACPVNVFQWY         | Helix  | Strand | 1.06  | 0.695 |
| 1i1w | DATEPSQGNNFAGAGA     | Helix  | Helix  | 1.97  | 1.68  |
| 1gui | WIGLYRGKTYT          | Strand | Strand | 1.44  | 0.919 |
| 1j53 | FSLKRDIPKTNTFCKVT    | Helix  | Strand | 1.92  | 1.77  |
| 1m40 | YTTGSQATMDE          | Strand | Helix  | 1.04  | 0.688 |
| 1fkm | KLLEQITDNYIHGQPGI    | Helix  | Helix  | 2.14  | 1.73  |

|      |                     |        |        |       |       |
|------|---------------------|--------|--------|-------|-------|
| 1e29 | TIPLDEAGGTTT        | Strand | Strand | 1.2   | 0.786 |
| 1gpq | TWLVNDALSIDGK       | Strand | Helix  | 1.96  | 1.44  |
| 1bgf | VQQLEIKFLEQ         | Helix  | Helix  | 1.15  | 0.737 |
| 1km6 | GETLRFADAI          | Helix  | Strand | 1.1   | 0.703 |
| 1fp2 | EAVTNDGKRGKVT       | Helix  | Strand | 1.71  | 1.35  |
| 1mml | LLSGLPPSHQWYT       | Helix  | Strand | 1.22  | 0.949 |
| 1eu8 | GFVWQGKQYEGL        | Strand | Helix  | 1.67  | 1.14  |
| 1oyz | LGQIKICKKCEDN       | Helix  | Helix  | 1.66  | 1.33  |
| 1eom | ENFRNNFNFIQ         | Helix  | Strand | 1.34  | 0.885 |
| 1hd2 | SIFGNRRLKRFSM       | Helix  | Strand | 1.82  | 1.46  |
| 1p4c | AALMSRQMDASFNWEA    | Helix  | Helix  | 1.78  | 1.45  |
| 1gqo | HEAEEQYSGIV         | Helix  | Strand | 1.56  | 1.03  |
| 1oqv | VIKSIAPASKNLDLTNITH | Strand | Helix  | 2.42  | 2.15  |
| 1ltz | LFGHVPLLINPVF       | Helix  | Helix  | 1.59  | 1.29  |
| 1ngn | YLTKQWRYPHELHGIGKYG | Helix  | Helix  | 2.62  | 2.29  |
| 1o82 | LAAAGRESIKA         | Helix  | Helix  | 0.846 | 0.549 |
| 1qw9 | IMTEKNGPAWK         | Strand | Strand | 1.15  | 0.748 |
| 1kuf | LDVWSEKDFITVQADAPT  | Strand | Helix  | 2.25  | 2.04  |
| 1ddw | FQIDPNTKKNWVP       | Strand | Strand | 1.31  | 1.04  |
| 1otk | LSEEGIAVDPRTLRAA    | Helix  | Helix  | 1.8   | 1.48  |
| 1e6i | KLESNKYQKMED        | Helix  | Helix  | 0.463 | 0.298 |
| 1pkh | FSKLLSPADVGYSE      | Strand | Strand | 2.13  | 1.54  |
| 3seb | NMKVLYDDNHVSA       | Helix  | Strand | 1.39  | 1.07  |
| 1gkm | NLSRGRFSGIRRKV      | Helix  | Helix  | 1.58  | 1.16  |
| 1ezm | DWFGTSPLTHKLYM      | Helix  | Strand | 2     | 1.44  |
| 8abp | SMLVQHPEVKHWL       | Helix  | Strand | 1.35  | 1.04  |

|      |                     |        |        |       |       |
|------|---------------------|--------|--------|-------|-------|
| 1h2w | MAWTHDGKGMF         | Strand | Strand | 1.26  | 0.831 |
| 1h2w | LCAEFPDEPKWMGG      | Strand | Strand | 1.82  | 1.3   |
| 7a3h | ELVNERGEQVQLKGM     | Strand | Strand | 1.73  | 1.46  |
| 1k94 | KRYSKNGRIFDD        | Helix  | Helix  | 1.31  | 1.01  |
| 1n55 | LAYEPVWAIGTGKVATPEQ | Strand | Helix  | 2.89  | 2.53  |
| 1o1x | FLSTPFDGGRHER       | Helix  | Helix  | 1.71  | 1.37  |
| 1lb6 | LTILDQSEAPVRQNHEE   | Strand | Strand | 1.94  | 1.63  |
| 1hzt | WLFNAKGQLLV         | Strand | Strand | 0.759 | 0.485 |
| 1oaa | VRELPRPEGLQRL       | Helix  | Strand | 1.65  | 1.16  |
| 1gxy | NNIKPSRSYPKGFNDFH   | Helix  | Helix  | 2.41  | 1.96  |
| 1jtv | TLQLDVRDSKS         | Strand | Helix  | 1.26  | 0.816 |
| 1hzi | SHHEKDTRCLGATAQQ    | Helix  | Helix  | 1.87  | 1.6   |
| 1brt | VEVEGAPHGLLW        | Strand | Helix  | 1.52  | 1.04  |
| 1j9b | RALLRKNVEPY         | Helix  | Helix  | 1.34  | 0.869 |
| 1aba | TKLGRDTQIGLTMQVF    | Helix  | Strand | 2.14  | 1.73  |
| 1nc5 | TETSEDGAFLV         | Strand | Strand | 0.733 | 0.483 |
| 1jmk | FAFPPVLGYGLMYQNL    | Strand | Helix  | 1.83  | 1.51  |
| 1r3f | VEERPVTFSAEQ        | Strand | Helix  | 1.05  | 0.695 |
| 1d2v | NEIVRFPTDQLTPDQ     | Helix  | Strand | 1.63  | 1.34  |
| 1qqq | FLQGDTNIAYL         | Helix  | Helix  | 0.906 | 0.578 |
| 1gkm | LTLKPGTLTLAQ        | Strand | Helix  | 1.25  | 0.84  |
| 1kv7 | LLNGCNARSLNF        | Strand | Strand | 1.61  | 1.04  |
| 1d5t | PALGLLEPIDQKF       | Helix  | Strand | 2.21  | 1.75  |
| 2mjp | LKLLEGKDNRNAY       | Helix  | Strand | 1.27  | 1.02  |
| 1izm | QDICQLGYDEDDNEEEL   | Helix  | Helix  | 2.55  | 2.17  |
| 2nlr | TTICEPFGTTT         | Strand | Strand | 1.55  | 1.05  |

|      |                      |        |        |       |       |
|------|----------------------|--------|--------|-------|-------|
| 1jcl | LKEQGTPEIRIA         | Helix  | Strand | 1.2   | 0.781 |
| 1fo6 | LDSFYETEMPGPVVRPL    | Helix  | Helix  | 2.6   | 2.16  |
| 1yac | KAQFPDAPYIA          | Helix  | Strand | 0.596 | 0.404 |
| 1n1p | LYVTDGSLIPGSVGVNPFVT | Strand | Helix  | 2.53  | 2.41  |
| 1b65 | AILPHMQSETPVPVYA     | Strand | Strand | 1.97  | 1.68  |
| 1thx | VITITDAEFES          | Strand | Helix  | 0.575 | 0.385 |
| 2pth | FKLGGGHGGHNGL        | Strand | Helix  | 1.92  | 1.52  |
| 1qwg | LKFGSSVNLAN          | Helix  | Strand | 1.69  | 1.08  |
| 1it6 | YLFLGDYVDRGKQSLE     | Strand | Helix  | 2.14  | 1.8   |
| 1h32 | RTSRMGAPEWDYIGPDM    | Helix  | Helix  | 1.79  | 1.49  |
| 1dk0 | GILDDYGLSVNSTFDQ     | Helix  | Helix  | 1.92  | 1.58  |
| 1qtw | GAHVSAAGGLAN         | Strand | Helix  | 1.1   | 0.727 |
| 1otg | IEELHPTLNFK          | Strand | Strand | 1.51  | 1.01  |
| 1fg7 | RAFCEPGKDAIL         | Helix  | Strand | 1.34  | 0.911 |
| 1mby | RYGENEKLPEYI         | Strand | Helix  | 1.34  | 0.902 |
| 7a3h | IIRNNDPNNIIV         | Helix  | Strand | 1.65  | 1.27  |
| 1nls | VVSYPNADSATV         | Strand | Strand | 1.52  | 1.01  |
| 1cv8 | RFLHPNLQGQQ          | Helix  | Helix  | 1.52  | 1.02  |
| 1a6m | HATKHKIPIKY          | Helix  | Helix  | 0.685 | 0.465 |
| 1em2 | DVSAGAAGGVVSPRDF     | Strand | Strand | 1.29  | 1.09  |
| 1ig3 | LFQATHITPVPIII       | Helix  | Strand | 2.05  | 1.44  |
| 1es5 | VVANNASQAHLIVGDKVT   | Helix  | Strand | 2.23  | 2.02  |
| 1kuf | GWAYVGRMCDEKYSVAV    | Strand | Strand | 1.9   | 1.54  |
| 1j98 | SHAKEYDHFDI          | Helix  | Strand | 1.15  | 0.743 |
| 1kxg | QRKKVHVFGDELSLVT     | Strand | Strand | 1.52  | 1.25  |
| 3vub | YTYKRESRYRLFV        | Strand | Strand | 1.5   | 1.2   |

|      |                     |        |        |       |       |
|------|---------------------|--------|--------|-------|-------|
| 1euw | GLIDSDYQGQLM        | Strand | Strand | 1.12  | 0.764 |
| 1km6 | GEVREYIDTVK         | Helix  | Strand | 1.13  | 0.734 |
| 1e6u | LHQLGWYHEISLEA      | Helix  | Helix  | 1.62  | 1.19  |
| 1o0i | GSLCLEEGKTV         | Helix  | Strand | 1.44  | 0.964 |
| 1hyo | GQMRPDNSKPPVYG      | Strand | Strand | 1.88  | 1.4   |
| 1hz4 | LIQLNTLPELE         | Helix  | Helix  | 1.02  | 0.68  |
| 1i1w | LIKARGKVYFG         | Helix  | Strand | 1.1   | 0.711 |
| 1kq6 | EKRFPVPSQHYV        | Strand | Strand | 1.03  | 0.667 |
| 1lk9 | SKFTGHSGSRFGWA      | Helix  | Strand | 1.69  | 1.19  |
| 1jnr | TLDMMGLAREDL        | Helix  | Helix  | 1.58  | 1.03  |
| 1moq | EQMLSQDKRIE         | Helix  | Helix  | 0.535 | 0.363 |
| 1ug6 | VAPGTGTLPVRY        | Strand | Strand | 1.44  | 0.937 |
| 1qnr | DSWGTNYTWGN         | Helix  | Helix  | 1.4   | 0.935 |
| 1lbu | SNVGGASNSRHMYGHAAD  | Helix  | Strand | 2.44  | 2.16  |
| 1fm0 | LALEDGKLLAA         | Helix  | Strand | 0.855 | 0.563 |
| 1h97 | YGKDHTSRKVTKDE      | Helix  | Helix  | 1.66  | 1.17  |
| 1jl1 | WKKRGWKTADKKPVKNVDL | Helix  | Helix  | 2.61  | 2.37  |
| 1fw9 | LRALRYSKEIPALDPQL   | Helix  | Helix  | 2.2   | 1.81  |
| 1mjf | AMLNGKHEKAKL        | Helix  | Strand | 0.775 | 0.498 |
| 1aox | VVTDGESHDGSMMLKA    | Strand | Helix  | 2.11  | 1.73  |
| 1g2q | EEAFPEVKIDYIV       | Helix  | Strand | 1.48  | 1.18  |
| 1od6 | YPGSFDPLTNGH        | Strand | Helix  | 1.33  | 0.88  |
| 1qj4 | LAKRPFFTKEGYGSIKKIY | Helix  | Strand | 2.99  | 2.66  |
| 1nof | SSQVDSSGKAT         | Strand | Strand | 1.36  | 0.911 |
| 1mai | IWQESRKVMRSPESQLFS  | Strand | Strand | 2.39  | 2.16  |
| 1qj4 | KMLTRKGSFLQNI       | Helix  | Helix  | 1.72  | 1.36  |

|      |                     |        |        |       |       |
|------|---------------------|--------|--------|-------|-------|
| 1gwe | QHFNRMNIPERRPHAKGSG | Helix  | Strand | 2.63  | 2.38  |
| 1bqc | RLYEANGQEFIIRGV     | Strand | Strand | 1.88  | 1.59  |
| 1of4 | ARKFERLSECEI        | Strand | Strand | 1.49  | 1.02  |
| 1n7o | VGTSKLDANATA        | Strand | Strand | 1.43  | 1.16  |
| 1p1m | NLKLGNGIAPVQR       | Helix  | Helix  | 1.43  | 1.14  |
| 1g61 | EIIKSKNTALGN        | Strand | Helix  | 1.32  | 0.9   |
| 1k7j | IIHGGYLGQKPTTVI     | Strand | Strand | 1.79  | 1.48  |
| 1mwp | WSDPSGTKTCIDTKEG    | Strand | Helix  | 2.08  | 1.75  |
| 1d3v | EKLKETEYNVRD        | Helix  | Strand | 0.812 | 0.521 |
| 1ako | EIRSMEKPSDHAPVWA    | Helix  | Strand | 1.94  | 1.64  |
| 1k4i | IIAAESVTTEQ         | Strand | Helix  | 1.18  | 0.763 |
| 1thx | VKKYKVEGVPALR       | Helix  | Strand | 1.21  | 0.982 |
| 1pgs | IVYGTDPDYKYS        | Strand | Strand | 1.61  | 1.05  |
| 1fvk | GVQKTQTIRSASD       | Helix  | Helix  | 1.81  | 1.39  |
| 1o4y | WTLTDDDETQEI        | Strand | Strand | 1.2   | 0.801 |
| 1bx4 | MKVMPYVDILF         | Helix  | Strand | 1.15  | 0.737 |
| 1n7o | KQVTNPSSRYQDETV     | Helix  | Helix  | 2.01  | 1.69  |
| 1kmv | WFSIPEKNRPLKGRINL   | Helix  | Strand | 2.2   | 1.78  |
| 1jks | ILELVAGGELFD        | Strand | Helix  | 1.84  | 1.2   |
| 1h75 | LRAQGFRQLPVVI       | Helix  | Strand | 1.03  | 0.807 |
| 1uke | IKNGEIVPSIV         | Helix  | Helix  | 0.97  | 0.629 |
| 119l | KKMVDKPTQRS         | Helix  | Helix  | 1.42  | 0.923 |
| 1jg1 | LKAEGHIRSKEV        | Helix  | Helix  | 1.11  | 0.757 |
| 1gk9 | NRFSDSTSEID         | Helix  | Helix  | 1.8   | 1.15  |
| 1qcz | IAAKTLVPVVG         | Helix  | Strand | 0.938 | 0.627 |
| 1br9 | MFKGPEKDIEFIY       | Strand | Strand | 1.62  | 1.3   |

|      |                   |        |        |       |       |
|------|-------------------|--------|--------|-------|-------|
| 1edg | AARFANYDEHLIF     | Helix  | Strand | 1.54  | 1.23  |
| 1lmi | FDVTGPSPTIVA      | Strand | Strand | 1.34  | 0.901 |
| 1k5n | TSVSRPGRGEPRFI    | Strand | Strand | 1.84  | 1.35  |
| 1jov | FTHYGEESAQA       | Strand | Strand | 1.16  | 0.755 |
| 1fip | NYFAQLNGQDVNDLYE  | Helix  | Helix  | 1.68  | 1.37  |
| 1nkr | LSREGEAHERRL      | Strand | Strand | 1.21  | 0.788 |
| 1omr | EELQLNTKFTEEE     | Helix  | Helix  | 1.54  | 1.24  |
| 1nyc | NLVYDTTKLTHLE     | Strand | Helix  | 1.54  | 1.24  |
| 1mg4 | FYRNGDRYFKGIVY    | Strand | Strand | 1.8   | 1.29  |
| 1nof | RVRIDPDSSKWNQLPS  | Strand | Helix  | 1.85  | 1.54  |
| 1l9y | ILINSLEANVPM      | Strand | Helix  | 1.35  | 1.05  |
| 1ifr | IWAAGAGATHSPPTDLV | Strand | Strand | 2.36  | 1.98  |
| 1ojr | VYSMGGMKQTISREE   | Helix  | Helix  | 1.7   | 1.45  |
| 1byi | AQEGRPISLV        | Helix  | Helix  | 1.08  | 0.689 |
| 1lc5 | LTVYPGRANYLL      | Strand | Strand | 1.23  | 0.825 |
| 1a8d | VQLKNITDYMYL      | Strand | Strand | 1.24  | 0.849 |
| 1f9v | QLVQSSLDGYNVC     | Helix  | Strand | 1.08  | 0.799 |
| 1ufv | RAALPREGVGF       | Helix  | Strand | 1.17  | 0.761 |
| 1fr2 | TICNADTSSEEE      | Helix  | Helix  | 1.64  | 1.09  |
| 1g13 | EFVVPDLELPSWL     | Strand | Helix  | 1.53  | 1.18  |
| 1ls1 | VLEVMDGESPE       | Strand | Helix  | 1.15  | 0.761 |
| 1g64 | KRMLADPLLDMMV     | Helix  | Strand | 1.08  | 0.844 |
| 1h75 | MENRGFDFFEMI      | Helix  | Strand | 0.725 | 0.492 |
| 1l5p | EFLEDQPANARL      | Helix  | Strand | 1.31  | 0.878 |
| 1n1d | VYLPRTEGISTTK     | Strand | Helix  | 1.36  | 1.07  |
| 1c7g | VVYEGMPSYGGLAGRD  | Helix  | Helix  | 2.26  | 1.9   |

|      |                   |        |        |       |       |
|------|-------------------|--------|--------|-------|-------|
| 1ayl | ELAGFKPDFIV       | Helix  | Strand | 1.12  | 0.725 |
| 1lni | YYTGDHYATFSLI     | Strand | Strand | 1.8   | 1.4   |
| 1mxi | LMFGPETRGIPMSI    | Strand | Helix  | 1.9   | 1.36  |
| 1m15 | ISNKRRRLGLTEYQ    | Strand | Helix  | 1.54  | 1.19  |
| 1jub | FMNASGVHCMTIED    | Strand | Helix  | 1.92  | 1.41  |
| 1ako | LRTGKCSFLPEE      | Helix  | Helix  | 1.25  | 0.855 |
| 1a6q | MQGWRVEMEDAH      | Strand | Strand | 1.82  | 1.19  |
| 1kte | QLTGARTVPRVF      | Helix  | Strand | 1.42  | 0.94  |
| 1it2 | EIINSMDNQEE       | Helix  | Helix  | 1.21  | 0.784 |
| 1mjf | KDLIKIDNGLLE      | Helix  | Helix  | 0.873 | 0.57  |
| 1jnr | LLKDNNDPNAVAG     | Strand | Strand | 1.74  | 1.37  |
| 1dj0 | EVGAHNQPESWIA     | Helix  | Helix  | 0.83  | 0.665 |
| 1gyc | DFHVPDQAGTF       | Strand | Strand | 1.19  | 0.76  |
| 1ds1 | RKALPLLDERT       | Helix  | Helix  | 1.5   | 1.01  |
| 1dk8 | FRKLEPCDSNEEK     | Helix  | Helix  | 1.51  | 1.19  |
| 1pqh | EEARTWRPNVA       | Helix  | Strand | 0.762 | 0.486 |
| 1p4c | FVLSTASNMSIED     | Strand | Helix  | 1.92  | 1.56  |
| 1k92 | QIYKPWLDTDF       | Strand | Helix  | 1.02  | 0.669 |
| 1knm | WRLNSDGSVVG       | Strand | Strand | 0.712 | 0.483 |
| 1g3p | VTQGTDPVKTY       | Strand | Strand | 1.65  | 1.1   |
| 1hxn | WDLKSGAQATWTEL    | Strand | Strand | 2.01  | 1.69  |
| 1cq3 | GFTKCPKISSIS      | Strand | Strand | 1.59  | 1.02  |
| 1qwn | LTISDSKPEHTSY     | Strand | Strand | 1.61  | 1.29  |
| 2nlr | WLDPTARTDGVNQTEI  | Strand | Strand | 2.04  | 1.66  |
| 7a3h | EWGTSAATGDGGVFLDE | Strand | Helix  | 2.51  | 2.09  |
| 1izm | LLCGGLKDQSWLP     | Helix  | Helix  | 1.21  | 0.965 |



|      |                     |        |        |       |       |
|------|---------------------|--------|--------|-------|-------|
| 3mag | LQRHGILDGATVV       | Helix  | Strand | 1.59  | 1.23  |
| 1gyc | VVDTLTNHTMLKSTSIHW  | Strand | Strand | 2.34  | 2.12  |
| 1iab | CWSYVGRISGAQQ       | Strand | Strand | 1.57  | 1.26  |
| 1l9y | AHLTPGHTRGCTTW      | Strand | Strand | 1.66  | 1.22  |
| 1lqt | DVLARTDIADHA        | Helix  | Helix  | 1.4   | 0.944 |
| 1o7j | ELLARDDVDGVV        | Helix  | Strand | 1.08  | 0.735 |
| 3sil | IAIYNDRVNSKLSRVM    | Strand | Strand | 2.31  | 1.9   |
| 1luz | IYLFDYPHFEAI        | Strand | Strand | 1.28  | 0.822 |
| 1cun | LSDDNTIGKEE         | Helix  | Helix  | 1.19  | 0.805 |
| 1a8e | VARSMGGKEDL         | Strand | Helix  | 1.39  | 0.946 |
| 1a6m | AILKKKGHEAE         | Helix  | Helix  | 0.95  | 0.648 |
| 1pgs | EYKFQSWTNNGTNGDAFYA | Strand | Strand | 2.56  | 2.3   |
| 1b0n | SIERNLQTNPSIQF      | Helix  | Helix  | 1.62  | 1.15  |
| 1ixh | GASDAPLSDEK         | Strand | Helix  | 0.989 | 0.671 |
| 1oqv | DEAKNPFIGNMNI       | Helix  | Strand | 2.16  | 1.76  |
| 1k92 | LELRRGNDYSI         | Strand | Strand | 1.29  | 0.865 |
| 1oc7 | YMDAGHAGWLGWPAN     | Strand | Helix  | 2.35  | 1.93  |
| 1oew | DFDTGSSDLWV         | Strand | Strand | 1.21  | 0.787 |
| 1hyo | VFSTQSNPKPRIG       | Strand | Strand | 1.01  | 0.781 |
| 1k3i | TIDLPIVAAAA         | Strand | Strand | 0.909 | 0.602 |
| 1lug | VEFDDSQDKAVLK       | Strand | Strand | 1.62  | 1.25  |
| 1iv3 | GLLFPDTPRWRGERSEV   | Helix  | Helix  | 2.19  | 1.97  |
| 1hx0 | RNVVDGQPFAN         | Helix  | Strand | 1.35  | 0.859 |
| 1l7a | KVYRYFGHEYIPAF      | Strand | Helix  | 1.38  | 1.03  |
| 1l2l | VIAHVPQLSELQ        | Strand | Helix  | 1.05  | 0.682 |
| 1eyh | REATSNPWPGPSSSL     | Helix  | Helix  | 1.25  | 1.07  |

|      |                     |        |        |       |       |
|------|---------------------|--------|--------|-------|-------|
| 1ogo | VIRPVSIYSYAIS       | Strand | Strand | 1.38  | 0.9   |
| 1fdr | TVHAPVLPFTAGQFTK    | Strand | Strand | 2.59  | 2.1   |
| 1o26 | RQWFRHRIASYN        | Helix  | Strand | 1.14  | 0.753 |
| 1k3i | TATHTVNTDQRRIIP     | Strand | Strand | 1.88  | 1.38  |
| 1qks | YLLLDPAAPPEFGMKE    | Helix  | Helix  | 1.99  | 1.66  |
| 1iv3 | VLTLDLDRPKLGPHRKA   | Strand | Helix  | 2.32  | 1.95  |
| 1qwn | SLFQHHDGITGTAKTHV   | Helix  | Helix  | 2.32  | 1.93  |
| 1k92 | IENRIIEAKSR         | Strand | Strand | 2.04  | 1.38  |
| 1p5f | AKKEGPYDVVV         | Helix  | Strand | 1.23  | 0.785 |
| 1ew2 | RLLSRNPRGFFL        | Helix  | Strand | 1.34  | 0.89  |
| 1qhd | LLPDAERFSFPRVI      | Strand | Strand | 1.6   | 1.16  |
| 1ltz | RIMNTRYRIDTFQKTYF   | Helix  | Strand | 1.93  | 1.6   |
| 1whi | IKVLGGSGRRYANIGDVVV | Strand | Strand | 2.54  | 2.2   |
| 1jcl | DLTTLNDDDTDEK       | Strand | Helix  | 1.48  | 1.14  |
| 1i0v | HKYNNYEGFDFSVSSPYYE | Strand | Strand | 2.65  | 2.37  |
| 1mqv | MLKGEAKWDQAV        | Helix  | Helix  | 0.549 | 0.369 |
| 1c8c | AVSEKDAPKEL         | Strand | Helix  | 1.1   | 0.704 |
| 1qnr | EEYGAQQNPCT         | Strand | Helix  | 1.15  | 0.782 |
| 1f9y | YRTPPLGPQDQPDYLN    | Strand | Strand | 1.65  | 1.37  |
| 1o98 | AAKEGVKRVYI         | Helix  | Strand | 0.869 | 0.572 |
| 1gvf | AMIDGSHFPFAE        | Strand | Helix  | 1.57  | 1.06  |
| 1eu8 | QKDNYDLSVFFQSV      | Helix  | Helix  | 1.66  | 1.17  |
| 1je1 | VFSSDAFYAEDEEF      | Strand | Helix  | 1.92  | 1.41  |
| 1mrj | KVTLPYSGNYER        | Strand | Helix  | 1.08  | 0.712 |
| 1ga6 | TSANGLASVNTQT       | Helix  | Strand | 1.37  | 1.1   |
| 1mf7 | FQVNNFEALKTIQNQ     | Strand | Helix  | 2.04  | 1.74  |

|      |                     |        |        |       |       |
|------|---------------------|--------|--------|-------|-------|
| 1m40 | ELDLNSGKILE         | Strand | Strand | 0.811 | 0.543 |
| 1n55 | FNEHTISHDVQCV       | Helix  | Strand | 1.52  | 1.2   |
| 1ld8 | EWLRDPSQELE         | Helix  | Helix  | 1.19  | 0.794 |
| 1fsg | QKYSGRESSVPPFFEH    | Helix  | Strand | 1.76  | 1.43  |
| 1lmi | NARTADGINYR         | Strand | Strand | 0.91  | 0.591 |
| 1k3x | WQVGLTGNHKAKDLNAAQ  | Helix  | Helix  | 2.44  | 2.19  |
| 1pa9 | EIANQRFGMPDYFRQSGTY | Helix  | Strand | 2.87  | 2.51  |
| 1jyo | HAITDLTNTYH         | Strand | Helix  | 1.55  | 1.02  |
| 1mk0 | LEKGCHSSIKL         | Helix  | Helix  | 1.07  | 0.692 |
| 1oey | DAWGQVKNYCLT        | Helix  | Strand | 1.48  | 0.968 |
| 1hqk | VRVPGSWEIPV         | Strand | Helix  | 1.13  | 0.747 |
| 1d4o | LVIGANDTVNSAAQ      | Strand | Helix  | 1.94  | 1.4   |
| 1ig3 | TTTGLKWNLTNDVL      | Strand | Strand | 1.81  | 1.35  |
| 1d3b | TVTYRDGRVAQ         | Strand | Strand | 0.477 | 0.304 |
| 1p5f | LTSRGPPTSFE         | Strand | Helix  | 1.59  | 1.07  |
| 1kp6 | WCTAHGTGNELRYA      | Strand | Helix  | 1.93  | 1.36  |
| 1jh6 | SEFTGPRFVPHVTV      | Helix  | Strand | 1.94  | 1.37  |
| 1mdz | IFSFHAIKNITCAEGGIV  | Strand | Strand | 2.38  | 2.11  |
| 1dfm | KVIDTNTPNTRRRKRGTV  | Strand | Strand | 1.94  | 1.72  |
| 1jnr | LEQKPNPEIDDAV       | Helix  | Helix  | 1.62  | 1.32  |
| 1hxr | RVLQPGTALFS         | Strand | Strand | 1.67  | 1.07  |
| 1lc5 | LEALTPDLDCLF        | Helix  | Strand | 1.51  | 1.03  |
| 1jmv | SSMQDRISTETQ        | Helix  | Helix  | 1.32  | 0.901 |
| 1dfm | GLIEDFETDIDI        | Strand | Strand | 1.43  | 0.962 |
| 1es9 | VVWVGTNNHGHTAEQ     | Strand | Helix  | 1.81  | 1.52  |
| 1i24 | VVHFGEQRSAPY        | Strand | Helix  | 1.6   | 1.09  |

|      |                    |        |        |       |       |
|------|--------------------|--------|--------|-------|-------|
| 1nuy | LVDRDVKIKKKKGSIIYS | Strand | Strand | 2.19  | 1.8   |
| 1k5c | FTVPAGNTLVL        | Strand | Strand | 1.19  | 0.795 |
| 1qu9 | VFVKDLNDFAT        | Strand | Helix  | 1.24  | 0.791 |
| 1l8j | QERTLAFPLTI        | Helix  | Strand | 1.56  | 1.02  |
| 1uol | YLDDRNTFRHSV       | Strand | Strand | 1.3   | 0.86  |
| 1o98 | AIREGEFDRNETF      | Helix  | Helix  | 1.29  | 1.01  |
| 1i24 | HQLGLESALTPIASIH   | Helix  | Helix  | 2.17  | 1.85  |
| 1jh6 | YTLDSLDGLSFR       | Helix  | Strand | 1.73  | 1.35  |
| 1tl2 | IGNGGWDDFRF        | Strand | Strand | 1.4   | 0.936 |
| 1mpl | AFASKDGKRSV        | Strand | Strand | 0.871 | 0.556 |
| 1okc | AKGMLPDPKNVHIIV    | Helix  | Helix  | 1.68  | 1.4   |
| 2pvb | YVIDQDKSGFIEEDE    | Helix  | Helix  | 1.5   | 1.28  |
| 1p1m | IHLYETSKEEYDLEDI   | Strand | Helix  | 1.71  | 1.42  |
| 1m15 | DSIKNKKTGMGATLLD   | Helix  | Helix  | 1.95  | 1.6   |
| 1m4l | ITTIYQASGGSID      | Helix  | Helix  | 1.96  | 1.55  |
| 1h2w | LSASGSDWVTI        | Strand | Strand | 1.25  | 0.835 |
| 1mdz | VMVDVDRDTLMVTPEH   | Strand | Helix  | 2.09  | 1.78  |
| 1bg8 | EALNNKDKPEDAVLDVQG | Helix  | Helix  | 2.31  | 2.05  |
| 1o4t | SIENTGNTDLEF       | Strand | Strand | 1.48  | 1.01  |
| 1lbu | RHAMGDKPITVNG      | Helix  | Strand | 1.24  | 1     |
| 1cfz | ALFTNKISPHQ        | Helix  | Helix  | 1.06  | 0.689 |
| 1uke | KRGESSGRSDDNIES    | Helix  | Helix  | 2.18  | 1.83  |
| 1ld8 | IQEFKLWDNELQ       | Helix  | Helix  | 1.12  | 0.756 |
| 1e42 | WKDIPNENELQF       | Helix  | Strand | 1.01  | 0.69  |
| 1fkm | AIRHPASGYVQGIND    | Helix  | Helix  | 2.38  | 2     |
| 1jm1 | TIKGVGPNGTIFA      | Strand | Strand | 1.73  | 1.37  |

|      |                     |        |        |       |       |
|------|---------------------|--------|--------|-------|-------|
| 1km6 | NYVGPSTRPER         | Strand | Helix  | 0.959 | 0.632 |
| 1n8k | AVLWEEKKPFSE        | Strand | Strand | 1.58  | 1.26  |
| 1cka | NAEDSEGKRGM         | Strand | Strand | 0.691 | 0.441 |
| 1qre | EADKLPEVTDDYAYSHTNE | Helix  | Helix  | 2.83  | 2.51  |
| 1pb7 | IVTIHQEPFVYVK       | Strand | Strand | 1.76  | 1.36  |
| 1jlx | VEPSKTYDGLVHI       | Strand | Strand | 1.55  | 1.26  |
| 1od3 | IYVGSTGSFDTYRDV     | Strand | Strand | 2.08  | 1.77  |
| 1lu4 | TATTLGAPFD          | Strand | Strand | 0.845 | 0.539 |
| 1qwn | QFMNVPTASW          | Helix  | Strand | 1.49  | 0.951 |
| 1p4c | WRFKPKRLVDVSRRLQAEV | Strand | Strand | 2.48  | 2.31  |
| 1mzb | LRKAGLKVTLPR        | Helix  | Helix  | 0.539 | 0.352 |
| 1qw9 | IAEIDKRIYGSF        | Strand | Strand | 1.27  | 0.856 |
| 1qks | GCHGVLKRGATGKALTPDL | Helix  | Helix  | 2.81  | 2.55  |
| 1a1x | RVQQIQVPLGDAARPSH   | Strand | Helix  | 1.9   | 1.6   |
| 1it6 | QIRRMRLPTDVPDQGLLC  | Helix  | Helix  | 2     | 1.78  |
| 1hfe | YKSYLEKPLGHKS       | Helix  | Helix  | 1.49  | 1.19  |
| 1dl2 | MYKQSSSGLAPEIVV     | Helix  | Strand | 1.66  | 1.37  |
| 1cl2 | IAAIRPQGEIDFSGTLIR  | Helix  | Strand | 2.19  | 2.03  |
| 1cnv | TCKTNNYKIVF         | Helix  | Strand | 1.27  | 0.824 |
| 1gp0 | QVTNPSTGHLFD        | Strand | Strand | 1.32  | 0.862 |
| 1nuy | GRKARGTGEMT         | Helix  | Helix  | 1.35  | 0.889 |
| 1lq9 | ELATGGVQEWIREVPGFLS | Helix  | Strand | 2.27  | 2.01  |
| 1eu8 | GVAPLPHFPGHKSAATLGG | Strand | Strand | 2.83  | 2.57  |
| 1m4j | SCSPPSDSWEQ         | Strand | Helix  | 1.03  | 0.67  |
| 1p4o | CMVAEDFTVKI         | Strand | Strand | 1.13  | 0.767 |
| 1jlx | KRFTSGKPGFINCMN     | Strand | Strand | 1.83  | 1.51  |

|      |                    |        |        |       |       |
|------|--------------------|--------|--------|-------|-------|
| 1fp2 | YVGGDMFTSIPNADAVL  | Strand | Strand | 2.36  | 2.01  |
| 1ifr | ALINSTGEEVA        | Strand | Strand | 1.17  | 0.769 |
| 1gwm | VIFKNASGLPNGYDN    | Strand | Strand | 1.72  | 1.43  |
| 1p5z | TFVNILKQLCEDWEV    | Helix  | Strand | 1.5   | 1.25  |
| 1gmi | EAVSLKPTAWS        | Strand | Helix  | 1.71  | 1.15  |
| 1jl1 | ALEALKEHAEVI       | Helix  | Strand | 1.46  | 0.98  |
| 1vie | VRKKSAAWQQGQ       | Strand | Strand | 1.23  | 0.842 |
| 1hdk | TFDHRIKPEAVKMQ     | Strand | Strand | 1.84  | 1.53  |
| 1fg7 | EQVFDSETNYIL       | Strand | Strand | 1.36  | 0.875 |
| 1g2r | RSFSMEVEESF        | Helix  | Helix  | 1.8   | 1.17  |
| 1r3f | KRIYNANRAGH        | Helix  | Strand | 1.31  | 0.89  |
| 2tnf | KGQGCPTYVLLTH      | Strand | Strand | 1.93  | 1.51  |
| 1aoc | STRDCEPVFGY        | Strand | Strand | 1.35  | 0.874 |
| 2pvb | LAACSAADSFKHKE     | Helix  | Helix  | 1.45  | 1.08  |
| 1fr2 | EMTEHPSGSDLI       | Helix  | Helix  | 1.56  | 1.05  |
| 1n55 | VVAPTFVHIPL        | Strand | Helix  | 1.01  | 0.645 |
| 1iof | TGFEPFGGEKINPTE    | Strand | Helix  | 1.62  | 1.32  |
| 1oqq | ELDVADGVSLMQ       | Strand | Helix  | 1.17  | 0.763 |
| 1ht6 | DKVGAASAGMV        | Helix  | Strand | 1.47  | 0.973 |
| 1n1d | FNLQKQKKAYHSYEH    | Helix  | Helix  | 2.08  | 1.73  |
| 1eom | SELTKYFGTTAPNNKQLQ | Helix  | Strand | 2.72  | 2.52  |
| 1moq | FADQDAGFVSSDNMHI   | Strand | Strand | 1.69  | 1.42  |
| 1l5p | HVSGKVAAAEDDE      | Strand | Helix  | 1.74  | 1.36  |
| 1es9 | RELFSPHALN         | Helix  | Strand | 0.879 | 0.579 |
| 1h2w | YVQDSLEGEARVF      | Strand | Strand | 1.93  | 1.56  |
| 1n55 | AANWKCNGTTAS       | Strand | Helix  | 1.63  | 1.12  |

|      |                      |        |        |       |       |
|------|----------------------|--------|--------|-------|-------|
| 1ayo | VYDYYETDEFAV         | Strand | Strand | 1.53  | 1.04  |
| 2pvb | ADGDKDGDGMIGVDE      | Helix  | Helix  | 1.65  | 1.34  |
| 2cpo | YVTGSDCGDSLNV        | Helix  | Strand | 1.83  | 1.41  |
| 1n7o | IQNTSTDTAAT          | Strand | Strand | 1.07  | 0.725 |
| 1it6 | LLEVRGSKPGKNVQLQENE  | Helix  | Helix  | 2.31  | 2.1   |
| 1d5t | YSESLARYGKSPYLY      | Helix  | Strand | 1.85  | 1.5   |
| 1a8d | WLRVPKVSASH          | Strand | Helix  | 1.11  | 0.743 |
| 1qqh | LAQSAYKTEDWTLQDTCEEL | Helix  | Helix  | 3.14  | 2.96  |
| 1g43 | YYYTQDADKPLTF        | Strand | Strand | 1.88  | 1.5   |
| 1el6 | YKDHPTDGSKLE         | Strand | Strand | 1.32  | 0.898 |
| 1cpm | NYYTNGVGGHEKVI       | Strand | Strand | 1.44  | 1.01  |
| 1qqf | LALMNKLEEPYLT        | Helix  | Helix  | 1.16  | 0.905 |
| 1oaa | LKSDGALVDCGT         | Helix  | Helix  | 1.1   | 0.73  |
| 1g13 | WDNCDEGKDPAVI        | Strand | Strand | 1.23  | 0.963 |
| 1n3l | FIKGTDYQLSKEY        | Strand | Helix  | 1.37  | 1.08  |
| 1svp | TIPRGVGGRGDAGRPI     | Strand | Strand | 2.03  | 1.71  |
| 1nep | FTSNTQSQSSKAV        | Strand | Strand | 2.03  | 1.62  |
| 1cqm | IVLNPNLDQSQ          | Strand | Helix  | 1.13  | 0.731 |
| 1kt6 | FSVDENGHMSA          | Strand | Strand | 0.621 | 0.397 |
| 1qwn | LEHLDGMVAPEVCPMETAA  | Strand | Strand | 24.4  | 21.9  |
| 1yac | LLVDHQAGLLSLVRDIEPDK | Strand | Helix  | 2.5   | 2.35  |
| 1g61 | CLTHPLVEDDE          | Strand | Helix  | 0.992 | 0.663 |
| 1htw | YLNGLGAGKTT          | Strand | Helix  | 1.46  | 0.998 |
| 1aol | VCPGSHRPREAKS        | Strand | Helix  | 1.72  | 1.39  |
| 1l8j | IIQLQPLQEPES         | Strand | Helix  | 1.46  | 0.956 |
| 1qks | SRLSASGRYLF          | Strand | Strand | 1.17  | 0.782 |

|      |                     |        |        |       |       |
|------|---------------------|--------|--------|-------|-------|
| 1gwe | SIAKGDHPKWD         | Helix  | Strand | 0.594 | 0.391 |
| 1jhj | HVPLTDNHKKPTRT      | Strand | Strand | 1.86  | 1.33  |
| 1ako | VRRGFPGDDEEA        | Strand | Helix  | 1.23  | 0.801 |
| 2ilk | QAENQDPDIKAH        | Helix  | Helix  | 1.35  | 0.868 |
| 1nw1 | ELLSTMDLDTDANTIPEL  | Helix  | Helix  | 2.15  | 1.95  |
| 1oux | GSEDGTDNDYNDVV      | Strand | Strand | 1.69  | 1.37  |
| 1cl2 | ATRNANGELFYGRRGTLTH | Helix  | Helix  | 2.58  | 2.41  |
| 1qcz | GVPVQSAALSGVDS      | Strand | Helix  | 1.21  | 0.898 |
| 3mag | FYNLGVIKWM          | Helix  | Strand | 0.595 | 0.386 |
| 1gpc | IRFLPSKNDEQAPFAIL   | Strand | Strand | 2.02  | 1.66  |
| 1q2y | RICVLKSHRSAGVGG     | Strand | Helix  | 1.7   | 1.4   |
| 1nkr | VIIGLYEKPSLS        | Strand | Strand | 1.41  | 0.904 |
| 1dj0 | FETTALRKDAA         | Strand | Helix  | 1.18  | 0.753 |
| 1oz3 | IHFDGWSHGYDFWI      | Strand | Strand | 1.3   | 0.965 |
| 1obo | LALDEDNQSDLTDD      | Strand | Helix  | 1.84  | 1.37  |
| 1qwn | SIQLTQDSPHVP        | Strand | Strand | 1.33  | 0.882 |
| 1b5e | AIWSEDNYAQYD        | Helix  | Helix  | 1.46  | 0.998 |
| 1fs1 | GIFSCCLPELLK        | Helix  | Helix  | 1.09  | 0.849 |
| 1cfz | LGVGNILLTDEAIGV     | Strand | Helix  | 1.96  | 1.59  |
| 3lzt | FESNFNTQATNR        | Helix  | Strand | 1.84  | 1.26  |
| 1iv3 | LLSAYGLGDIGL        | Helix  | Helix  | 1.41  | 0.904 |
| 1jlx | FGYDNLNDPKVAHQM     | Strand | Strand | 2.06  | 1.71  |
| 1nkr | FSISRMTQDLAGTY      | Strand | Strand | 1.96  | 1.46  |
| 1ld8 | MLENQCDNKED         | Helix  | Helix  | 0.997 | 0.657 |
| 1dfm | TTYADKRYRRTITK      | Strand | Strand | 2.17  | 1.57  |
| 1d5t | LYPLYGLGELP         | Strand | Helix  | 1.08  | 0.722 |



|      |                  |        |        |       |       |
|------|------------------|--------|--------|-------|-------|
| 1fj2 | EVKNGIPSNRIIL    | Helix  | Strand | 0.885 | 0.682 |
| 8abp | QKRGWDVKESAV     | Helix  | Strand | 1.72  | 1.16  |
| 1lug | LKVGSAPGLQKV     | Strand | Helix  | 1.47  | 1.19  |
| 1ipi | VVRSAGSKKVDLVA   | Strand | Strand | 1.56  | 1.13  |
| 1o7j | SNMASENMTGDV     | Strand | Helix  | 1.45  | 0.977 |
| 1qqh | YYMTDAGTWDK      | Strand | Strand | 0.568 | 0.374 |
| 1oio | WMGDTNYSRGTA     | Strand | Strand | 1.31  | 0.883 |
| 1dp7 | SQEQKLEPVNAAS    | Helix  | Helix  | 1.77  | 1.39  |
| 1n7o | VQSDSYDVFKNLKYKD | Helix  | Helix  | 2.68  | 2.4   |
| 1obo | LFYGTQTGKTE      | Strand | Helix  | 1.46  | 0.933 |
| 1jlx | MFVTSNGTICI      | Strand | Strand | 0.693 | 0.443 |
| 1lok | SLESFTNRFYTTTSG  | Helix  | Helix  | 1.61  | 1.34  |
| 1k6k | VAIFSEQESQAA     | Helix  | Helix  | 0.915 | 0.606 |
| 1ako | LLTKETPIAVR      | Strand | Strand | 2     | 1.3   |
| 1odm | FCYLNPNFPTDHPRI  | Strand | Helix  | 1.88  | 1.53  |
| 1f7l | IRKDQNGKPYI      | Strand | Strand | 0.628 | 0.42  |
| 1jub | QKENAQEGPIFFS    | Helix  | Strand | 1.56  | 1.23  |
| 1l7a | VKYHGYNASYDGEIHE | Strand | Helix  | 2.13  | 1.81  |
| 1ao3 | IDVPWNVVPEKAH    | Strand | Helix  | 1.68  | 1.35  |
| 1ogo | ISQSDDGGIVI      | Strand | Strand | 0.985 | 0.669 |
| 1hxx | FLASDESSVMSGSELH | Helix  | Strand | 1.77  | 1.47  |
| 1b65 | FNGNGEMTGTHW     | Strand | Helix  | 2.29  | 1.52  |
| 1ga6 | EGLDSNGKLWA      | Strand | Strand | 0.653 | 0.43  |
| 1iuj | RQRARLVDRMPGFIR  | Helix  | Strand | 1.51  | 1.29  |
| 1gxu | LYQHCPPLARID     | Helix  | Strand | 1.13  | 0.769 |
| 1g4y | NTKLVKKIDHAK     | Helix  | Helix  | 1     | 0.682 |

|      |                      |        |        |       |       |
|------|----------------------|--------|--------|-------|-------|
| 1mk4 | ISVFANYDGGPGQDRVLF   | Strand | Strand | 2.44  | 2.01  |
| 1mk4 | SGVHPDFRKMVQ         | Strand | Helix  | 1.01  | 0.678 |
| 1g6l | IRKYFSGIPTIGV        | Strand | Helix  | 1.44  | 1.11  |
| 1jku | GYLLEDAPFGPED        | Helix  | Helix  | 1.25  | 0.99  |
| 1qks | ILASHYRPEFI          | Strand | Strand | 0.59  | 0.394 |
| 1cnv | NAIQTRHFDYIF         | Helix  | Strand | 1.12  | 0.762 |
| 1llf | KQSFIHASDAE          | Helix  | Helix  | 0.976 | 0.643 |
| 1d5t | GHALALYRTDDYLDQPCLET | Helix  | Helix  | 2.24  | 2.06  |
| 1i8a | QTFGTGGSPARFKT       | Strand | Strand | 1.71  | 1.25  |
| 1a3c | GADIPVDITDQKVI       | Strand | Strand | 1.84  | 1.29  |
| 1ifc | KLGAHDNLKLT          | Helix  | Strand | 0.886 | 0.575 |
| 1f9v | VTKIQNTAQVHE         | Strand | Strand | 0.992 | 0.657 |
| 1jub | VKLPPYFDLVH          | Strand | Helix  | 0.979 | 0.625 |
| 3sil | SSAQNKNNDYTRSDISL    | Strand | Strand | 2.27  | 1.93  |
| 1ga6 | YMADQSASGNTGL        | Strand | Helix  | 1.38  | 1.09  |
| 1n8k | SVITGVPPDSQNLSM      | Strand | Strand | 1.68  | 1.39  |
| 1oqv | TSVGDMFPYIA          | Helix  | Strand | 1.26  | 0.856 |
| 1dci | VQLNRPEKRNAMNRAF     | Strand | Helix  | 1.99  | 1.61  |
| 1bdy | SYELGSLQAEDDASQPFCA  | Strand | Strand | 2.81  | 2.52  |
| 1jhs | QASNKELPARC          | Helix  | Helix  | 0.874 | 0.576 |
| 1l7a | IDVALEQPYLEIN        | Helix  | Helix  | 1.7   | 1.31  |
| 1a3c | LVDRGHRELPIRADYIG    | Strand | Strand | 2.32  | 1.88  |
| 1uol | RLGFLHSGTAKSVTCTY    | Strand | Strand | 2.7   | 2.3   |
| 1hyo | LLASGTISGSDPESFGSMLE | Strand | Helix  | 2.39  | 2.25  |
| 1bxy | KALGLRRLQQERV        | Helix  | Strand | 1.48  | 1.14  |
| 1mnn | VVESHTGRTLDRII       | Strand | Strand | 2.03  | 1.67  |

|      |                     |        |        |       |       |
|------|---------------------|--------|--------|-------|-------|
| 1jer | LQFNFPANAHNVHEM     | Strand | Strand | 2.15  | 1.79  |
| 1ig3 | HAFTPLEPLLPTGNLKYCL | Strand | Strand | 2.69  | 2.39  |
| 1f9v | CRIRPALKNLENSDTSLI  | Strand | Strand | 2.58  | 2.39  |
| 1lkk | RQLLAPGNTHGSFLI     | Helix  | Strand | 1.2   | 0.976 |
| 2arc | IDRPLGMKGYIL        | Strand | Strand | 1.55  | 0.996 |
| 1k5c | LVLNPDKGATVT        | Strand | Strand | 1.56  | 1.03  |
| 1dqe | EKSTPANDDKCI        | Helix  | Helix  | 1.35  | 0.883 |
| 1jfb | RLVEPKDDIIS         | Helix  | Helix  | 1.19  | 0.774 |
| 1jm1 | FFAYPLTDEPCF        | Strand | Strand | 1.28  | 0.849 |
| 1m2x | LAKENKPRAQYTF       | Helix  | Strand | 1.71  | 1.38  |
| 1a8d | HNGQIGNDPNRDI       | Strand | Strand | 1.48  | 1.19  |
| 1jcl | FIKTSTGKVAVNATPES   | Strand | Helix  | 2.45  | 2.09  |
| 1oru | VRHALGIRGIVC        | Helix  | Strand | 1.44  | 0.98  |
| 1jhs | VANKWGKPDLAQTVVI    | Strand | Strand | 1.96  | 1.63  |
| 1ayl | VFFGLSGTGKTT        | Strand | Helix  | 1.04  | 0.69  |
| 1cq3 | IGDMCKESSELEVKD     | Strand | Strand | 1.63  | 1.38  |
| 1aox | VCDESNSIYPWDA       | Strand | Helix  | 1.44  | 1.14  |
| 1oqq | VYVSHDGTRRE         | Strand | Strand | 0.958 | 0.631 |
| 1o7i | TLWGKHAGSIKEGQVVK   | Strand | Strand | 2.7   | 2.3   |
| 1jlx | LRYQSDNIQQYGLLQF    | Strand | Strand | 2.06  | 1.76  |
| 3mag | NKMLQPFAPSYSAEMRL   | Strand | Strand | 2.02  | 1.72  |
| 1uhn | ALSVFHPNAPIDD       | Helix  | Helix  | 1.6   | 1.23  |
| 1lj8 | DEHGIDDAWPVVC       | Helix  | Strand | 1.81  | 1.47  |
| 1ht6 | WRLDFARGYSPEM       | Strand | Helix  | 1.75  | 1.42  |
| 1o4y | ITSKNKIQYPVYM       | Strand | Strand | 2.08  | 1.69  |
| 1tul | IKVASSPQLRLLYKNAYS  | Strand | Strand | 2.63  | 2.41  |

|      |                      |        |        |       |       |
|------|----------------------|--------|--------|-------|-------|
| 1nw1 | TFCHNDLQEGNILL       | Strand | Strand | 1.84  | 1.36  |
| 1f9v | NKLKTKGWDYK          | Helix  | Strand | 0.673 | 0.43  |
| 1onw | FHMGDSKKALQPI        | Strand | Helix  | 1.53  | 1.24  |
| 1uke | FVLGGPGSGKGT         | Strand | Helix  | 0.918 | 0.59  |
| 1jfb | KQAAKAKPTFVDMDPPEHM  | Helix  | Helix  | 2.67  | 2.35  |
| 1p35 | FEYNPIGNKVI          | Strand | Strand | 1.02  | 0.648 |
| 2mjp | EQIKISYPEIQGTLEE     | Strand | Helix  | 1.93  | 1.59  |
| 1lqp | EWKQNRSEGDSFY        | Strand | Strand | 1.51  | 1.18  |
| 1lug | VDVLDSIKTKGKSAD      | Helix  | Strand | 2.01  | 1.64  |
| 1lqt | DVVIDPAELDGITDED     | Strand | Helix  | 1.98  | 1.66  |
| 1moq | EFYRKSAVRRNSLM       | Helix  | Strand | 1.99  | 1.64  |
| 1qwn | SWAIDPFGHSPTMP       | Strand | Helix  | 1.72  | 1.21  |
| 1kyf | LQTKPVDPTVDGGAQVQ    | Strand | Strand | 1.82  | 1.47  |
| 1ka1 | KSNFPDDKVVG          | Helix  | Strand | 1.26  | 0.82  |
| 1cpm | TYTGPAHGTQWDEI       | Strand | Strand | 1.44  | 1.06  |
| 1is3 | DHRFSYGADQNVLV       | Strand | Strand | 1.59  | 1.12  |
| 1k94 | MTVDQDGSQTVEHHE      | Helix  | Helix  | 1.33  | 1.13  |
| 1i07 | LEILDDRRQWWK         | Strand | Strand | 1.31  | 0.868 |
| 1lyc | LTAAGQFGGGGADGSII    | Helix  | Helix  | 2.95  | 2.45  |
| 1m65 | IAGFHEPVFAPHDKAT     | Strand | Helix  | 1.92  | 1.64  |
| 1kd0 | IKLRVREDYAPIFH       | Helix  | Strand | 1.64  | 1.22  |
| 1nw1 | LSEHHLGPKLYG         | Helix  | Strand | 1.15  | 0.741 |
| 1dxg | VLEEGGGTLVC          | Strand | Strand | 1.39  | 0.931 |
| 1cfz | ADAIVSKKNAPGTMMI     | Strand | Strand | 2.2   | 1.87  |
| 1qwg | VLAKNVDINKVIF        | Helix  | Strand | 1.33  | 1.06  |
| 1e5k | AVDFSDHKDAFVNVNTPPEE | Strand | Helix  | 2.42  | 2.17  |

|      |                       |        |        |       |       |
|------|-----------------------|--------|--------|-------|-------|
| 1gpq | VMWSEKSNQMTG          | Strand | Strand | 0.732 | 0.47  |
| 1i1w | INDYNLDSASYPKT        | Strand | Helix  | 1.66  | 1.2   |
| 1qw9 | MAVNLGTRGIDA          | Strand | Helix  | 1.86  | 1.19  |
| 1bg8 | ACTQDKQANFKD          | Helix  | Helix  | 1.48  | 0.978 |
| 1mby | SYTSPDGQTTR           | Strand | Strand | 0.672 | 0.429 |
| 1mai | EKFARDIPEDRCFS        | Helix  | Strand | 1.14  | 0.803 |
| 1qqf | SLAANLIAIDSQV         | Helix  | Helix  | 1.37  | 1.08  |
| 1o98 | FGLSDGGVHSHIHH        | Strand | Helix  | 1.79  | 1.53  |
| 1ojr | IKATNGKDRVIM          | Helix  | Strand | 1.21  | 0.779 |
| 1ifc | AYSLADGTELT           | Strand | Strand | 0.823 | 0.558 |
| 1e1a | RIRCPFEKPSN           | Strand | Strand | 1.16  | 0.79  |
| 1o97 | DLQYKPGDNKAV          | Strand | Strand | 0.936 | 0.601 |
| 1j98 | DIRFCQPNKQAMKPDT      | Strand | Helix  | 2.65  | 2.21  |
| 1ogo | ILATDGSSLGSPSDVVI     | Strand | Strand | 2.18  | 1.81  |
| 1ug6 | TLYHWDLPLAL           | Strand | Helix  | 1.24  | 0.817 |
| 1jyk | LVFNDKYADYNNFYS       | Strand | Helix  | 1.89  | 1.61  |
| 1k5n | LGFYPAEITLT           | Strand | Strand | 1.5   | 0.986 |
| 1a8d | HLVNNESEVIV           | Strand | Strand | 1.12  | 0.751 |
| 1a8d | TFRDLDPDKFNAYLANKWVFI | Strand | Strand | 2.77  | 2.55  |
| 1gxr | FHVTADGQMQP           | Strand | Strand | 0.963 | 0.615 |
| 1gyx | IKCFPRELDEQQ          | Strand | Helix  | 1.19  | 0.773 |
| 1mla | WQQQGKAPAMMA          | Helix  | Strand | 1.47  | 1.15  |
| 1lni | EYTVITPGARTRGTRRII    | Strand | Strand | 1.83  | 1.66  |
| 1n8k | KPIHHFLGTSTFSQYTV     | Strand | Strand | 1.87  | 1.56  |
| 1ofz | VYYQKSNLSGSSI         | Strand | Strand | 1.77  | 1.36  |
| 1qtw | IDGVEDKSRVGV          | Helix  | Strand | 0.949 | 0.648 |

|      |                      |        |        |       |       |
|------|----------------------|--------|--------|-------|-------|
| 1aox | FNVSDEAALLEKAGT      | Strand | Helix  | 1.82  | 1.54  |
| 1mjf | REVLQHDVDEVI         | Helix  | Strand | 0.821 | 0.56  |
| 1dk0 | LTYTLFNPAHTLYG       | Strand | Strand | 2.12  | 1.76  |
| 1lg7 | AAVSHWDHMYIGMAGKRPF  | Helix  | Helix  | 2.36  | 2.07  |
| 1b5e | NAGDSTRQYKAG         | Helix  | Strand | 1.34  | 0.864 |
| 1ofz | ISWAATGGRQQR         | Strand | Strand | 1.48  | 0.978 |
| 1g2r | FIDPTGKANGRGA        | Strand | Strand | 1.35  | 1.08  |
| 1kuf | LLTDTNFARNTIGWA      | Strand | Strand | 1.99  | 1.68  |
| 1g13 | GSTSVPLSSPLKVD       | Strand | Strand | 1.59  | 1.18  |
| 3ezm | ECKTRAQQFVS          | Strand | Strand | 1.1   | 0.722 |
| 1gv9 | WYTENQGLDGP          | Strand | Strand | 1.06  | 0.686 |
| 1bxy | VKLVKSPIGYPKDQ       | Strand | Helix  | 1.47  | 1.09  |
| 1hzt | RATDPSGIVEN          | Strand | Strand | 0.928 | 0.63  |
| 1ayo | VLQDIPVRDLKPAIV      | Strand | Strand | 1.9   | 1.62  |
| 1jov | YFNIGDINQVEV         | Strand | Strand | 1.69  | 1.1   |
| 1oc7 | SAVAEVPSFQWL         | Helix  | Strand | 1.31  | 0.884 |
| 1mml | LTWTRLPQGFKNSPT      | Strand | Helix  | 1.94  | 1.58  |
| 1a1x | SHLLTSQLPLMWQ        | Helix  | Strand | 1.42  | 1.15  |
| 1eu8 | AMNLGWNPGRVDVYDDPAV  | Helix  | Helix  | 2.23  | 1.93  |
| 1aol | TGRVYWKPSSSWDYITV    | Strand | Strand | 2.25  | 1.87  |
| 1dqt | VVLASSHGVSASF        | Strand | Strand | 1.02  | 0.694 |
| 3seb | KNKKLYEFNNSPYET      | Helix  | Strand | 2.11  | 1.78  |
| 1aox | VVFNLNITYKTKEE       | Strand | Helix  | 1.63  | 1.27  |
| 1qhd | VITSADGATTWY         | Strand | Strand | 1.34  | 0.876 |
| 1dj0 | LAAKDRTLAAATAKAEGLYL | Helix  | Strand | 2.69  | 2.48  |
| 1ojr | VKVSDSGAGYH          | Strand | Strand | 1.2   | 0.776 |

|      |                      |        |        |       |       |
|------|----------------------|--------|--------|-------|-------|
| 1jku | FKHTRKLQYNAKPDRSDPIM | Strand | Helix  | 2.88  | 2.71  |
| 1jtv | ARALACPPGSLET        | Helix  | Strand | 1.64  | 1.27  |
| 1nwz | YTFDYQMTPTKV         | Strand | Strand | 1.32  | 0.849 |
| 1ucs | VVANQLIPINTALTLIMMKA | Strand | Strand | 2.57  | 2.37  |
| 1psu | ACNSQGLAAVAS         | Helix  | Strand | 1.03  | 0.674 |
| 1kq6 | DDLKLPTDNQTKKPETY    | Helix  | Strand | 2.5   | 2.08  |
| 1f0i | RQVSPGLEGDVWER       | Helix  | Strand | 1.8   | 1.33  |
| 1ako | ETELKRDNPVLI         | Helix  | Strand | 1.35  | 0.867 |
| 1ji3 | TYTLAVGPLSSNWD       | Strand | Helix  | 2     | 1.48  |
| 1m9z | VRFSTCDNQKSCM        | Strand | Strand | 1.68  | 1.36  |
| 1f9v | INVNEFDDNSGVQSM      | Strand | Strand | 1.6   | 1.35  |
| 1bx4 | TAFAVLDQDQKEIIDTNG   | Strand | Helix  | 2.42  | 2.2   |
| 1l7a | MNLADRVKVPVLM        | Helix  | Strand | 1.7   | 1.33  |
| 1koi | KKVDKNGNVKV          | Strand | Strand | 1.24  | 0.818 |
| 1vie | VESEAHPGSVQI         | Strand | Strand | 1.23  | 0.79  |
| 1kr4 | RKLHPYETPAIFT        | Helix  | Strand | 1.4   | 1.1   |
| 1fo6 | CIVAPTGEIVA          | Strand | Strand | 0.933 | 0.615 |
| 1ga6 | LYTTSAGAYSN          | Strand | Strand | 1.21  | 0.806 |
| 1o98 | SYKHGIYDEFVLPSVI     | Helix  | Strand | 1.91  | 1.59  |
| 1okc | RMMMQSGRKGADIMYTGTV  | Helix  | Helix  | 2.51  | 2.36  |
| 1lk9 | VKCEWEEDKDCYQ        | Strand | Helix  | 1.58  | 1.22  |
| 1ls1 | KEALGGEARLPVLKDRNLW  | Helix  | Strand | 2.72  | 2.46  |
| 1jh6 | LCKTDTEDKTLETWETV    | Strand | Strand | 1.83  | 1.48  |
| 1l9y | ILLISHAHFDH          | Strand | Helix  | 1.26  | 0.816 |
| 1ogo | GPINNGDWGAKSILY      | Strand | Strand | 1.85  | 1.57  |
| 1k5n | HVQHEGLPKPLTL        | Strand | Strand | 1.46  | 1.13  |

|      |                      |        |        |       |       |
|------|----------------------|--------|--------|-------|-------|
| 3chb | TESLAGKREMAI         | Strand | Strand | 1.15  | 0.749 |
| 1elk | KRIVGNKNFHE          | Helix  | Helix  | 0.975 | 0.661 |
| 1dy5 | MKSRNLTKDRCKPVNT     | Helix  | Strand | 1.38  | 1.14  |
| 1jbe | ISDWNMPNMDGLE        | Strand | Helix  | 1.84  | 1.44  |
| 1jfb | CTEQVKPGNIDKSD       | Helix  | Helix  | 1.43  | 1.02  |
| 2sak | TGVDSKGNELL          | Strand | Strand | 0.658 | 0.433 |
| 1ds1 | HARTPFSPRWDGKDRWLH   | Strand | Strand | 2.59  | 2.37  |
| 1cxq | FTLEPRMAPRSWLA       | Strand | Strand | 1.55  | 1.12  |
| 1qks | VFDIKAMTGDGSDPEFKT   | Strand | Strand | 1.98  | 1.8   |
| 1kmz | EAVLDGGIRLA          | Strand | Strand | 0.59  | 0.383 |
| 1eif | IMDLQTYETLE          | Strand | Strand | 0.852 | 0.569 |
| 1a8e | VVKKDSGFQMNQLRGKKSCH | Strand | Strand | 2.61  | 2.51  |
| 1oc7 | QWLDRNVTVDTLV        | Strand | Helix  | 1.86  | 1.37  |
| 1e29 | QCHLQGKTKTNNNVSLGLAD | Helix  | Helix  | 3.01  | 2.86  |
| 1ji3 | HYPELGMNAFS          | Strand | Helix  | 1.24  | 0.844 |
| 1eif | ELPIPEGIEGLEPGGEVE   | Strand | Strand | 2.38  | 2.13  |
| 1c5e | LVAWDGTTDGAAVG       | Strand | Strand | 1.6   | 1.16  |
| 1ff4 | VTTKSIGGVTT          | Strand | Strand | 1.24  | 0.826 |
| 1dqg | FGIKGTELYFN          | Strand | Strand | 1.61  | 1.04  |
| 1gci | GASFVPGEPSTQDGNGHGT  | Strand | Helix  | 2.58  | 2.24  |
| 1k4n | RRLGLNITPLTAD        | Helix  | Strand | 1.6   | 1.27  |
| 1qqf | LNTAKDRNRWEEPGQQLY   | Helix  | Helix  | 2.12  | 1.97  |
| 1nof | NISNANVTKFE          | Strand | Strand | 1.11  | 0.734 |
| 1cnv | LSAAPGCLSPDEYLDNA    | Strand | Helix  | 2.46  | 2.05  |
| 1qwg | KVCGDYIDFVK          | Helix  | Strand | 1.5   | 0.97  |
| 1o50 | KDVCKLISLKPTVV       | Helix  | Strand | 1.74  | 1.28  |



|      |                     |        |        |       |       |
|------|---------------------|--------|--------|-------|-------|
| 1obo | FGTGDQIGYADNFQDAI   | Strand | Helix  | 2.39  | 1.96  |
| 1ezm | TEQNSGLIYRGQS       | Helix  | Helix  | 1.98  | 1.53  |
| 1e9g | AIDINDPLAPKLNIED    | Strand | Helix  | 2.43  | 2.07  |
| 1hd2 | FGVPGAFTPGC         | Strand | Helix  | 1.28  | 0.819 |
| 1hju | QRVWVNPADGNYNLDY    | Strand | Helix  | 1.79  | 1.47  |
| 1qau | TTFTGDGTPKT         | Strand | Strand | 0.662 | 0.422 |
| 1f8e | TCRDNWQGSNRPVI      | Strand | Strand | 1.8   | 1.32  |
| 1mrj | HLTNYAETIS          | Strand | Strand | 1.09  | 0.706 |
| 1ew2 | FARGPQAHLVHGVQE     | Strand | Strand | 2.3   | 1.94  |
| 1it6 | EYGGFPPESNYLF       | Helix  | Strand | 1.95  | 1.58  |
| 3sil | DFYPKVGNASGAGYSCL   | Strand | Strand | 2.51  | 2.04  |
| 1elk | DAFRSSPDLTGV        | Helix  | Helix  | 1.25  | 0.843 |
| 1n3l | ESIGVPLEKLF         | Helix  | Strand | 1.16  | 0.783 |
| 1k6k | HVQSSGRNEVTGAN      | Helix  | Helix  | 1.39  | 1.01  |
| 1qhd | IKLSGIKFKRINFDSSEYI | Helix  | Helix  | 1.99  | 1.88  |
| 1g64 | VVQFIKGTWPNGER      | Strand | Helix  | 1.54  | 1.11  |
| 1orn | AKMFPDAHCELVHRNPFE  | Helix  | Helix  | 2.45  | 2.19  |
| 1qtw | LNPHPGSHLMQISEED    | Strand | Helix  | 1.63  | 1.32  |
| 1gv9 | VWTKTKAAFENWEV      | Strand | Strand | 2.27  | 1.69  |
| 1fit | ALVNRKPVVPGHVLV     | Strand | Strand | 1.94  | 1.57  |
| 1jks | FIKKRRTKSSRRGVSRED  | Strand | Helix  | 2.1   | 1.94  |
| 1iab | EIFTSGSGCWS         | Strand | Strand | 0.87  | 0.556 |
| 1gui | TYTHPDDADEVVQ       | Strand | Strand | 1.69  | 1.34  |
| 1qnr | SRYANSTAIFA         | Helix  | Strand | 0.961 | 0.614 |
| 1kmv | MTTSSVEGKQNL        | Helix  | Strand | 1.69  | 1.32  |
| 113l | EHERTLSKDE          | Helix  | Helix  | 1.15  | 0.759 |

|      |                   |        |        |       |       |
|------|-------------------|--------|--------|-------|-------|
| 1uke | EENMKDFVDTK       | Helix  | Strand | 1.19  | 0.783 |
| 1muw | LLADRTAFEDFDVDA   | Helix  | Helix  | 2     | 1.65  |
| 1q8c | FLEYDTKERQLNEWQ   | Helix  | Helix  | 1.58  | 1.35  |
| 1qwn | MHNTLPHWREQ       | Strand | Strand | 1.16  | 0.789 |
| 1d4o | FGIHPVAGRMPGQLN   | Strand | Helix  | 2.13  | 1.73  |
| 1fkm | KLLIGYLPVNTKRQEG  | Helix  | Helix  | 1.71  | 1.39  |
| 1ie9 | GLKKNLHEEE        | Helix  | Helix  | 0.416 | 0.27  |
| 1g64 | MVAYDYLPLEE       | Helix  | Helix  | 0.663 | 0.437 |
| 1f8e | RIGEDSDVLT        | Helix  | Strand | 1.09  | 0.71  |
| 1f8e | WEPLAGTAKHIEEC    | Strand | Strand | 2.05  | 1.48  |
| 1k94 | AVAGQDGEVDAEE     | Helix  | Helix  | 1.58  | 1.23  |
| 1eu8 | SGERETNPNFWGF     | Helix  | Strand | 1.47  | 1.19  |
| 1a8e | KSVIPSDGPSV       | Helix  | Strand | 0.866 | 0.562 |
| 1p4c | AQIGCPDITSLSPDYLN | Helix  | Strand | 2.15  | 1.99  |
| 1knm | IYSCWGGDNQKWRL    | Strand | Strand | 1.82  | 1.35  |
| 1l7a | ELAKVQAEPDLQ      | Helix  | Strand | 1.12  | 0.721 |
| 1ew2 | GQLTSEEDTLS       | Helix  | Strand | 0.969 | 0.638 |
| 3ezm | LKWQPSNFIETCRN    | Strand | Strand | 1.59  | 1.15  |
| 1nof | TEHYVDSKQSANNWTS  | Strand | Helix  | 2.09  | 1.74  |
| 1a8d | TLKDSAGEVRQ       | Strand | Strand | 0.892 | 0.579 |
| 1g3p | SLEESQPLNTFMF     | Strand | Strand | 1.54  | 1.22  |
| 1d0d | YFRNGKGGCDS       | Strand | Strand | 1.07  | 0.717 |
| 1mdz | LMALGIGEGDEVI     | Helix  | Strand | 1.43  | 1.13  |
| 1e9g | ASDAIPPASLK       | Helix  | Strand | 0.739 | 0.494 |
| 1lpl | CEVTVGAQMARRG     | Strand | Strand | 1.19  | 0.952 |
| 1izm | LKSAGIGFNATE      | Helix  | Helix  | 0.927 | 0.623 |

|      |                   |        |        |       |       |
|------|-------------------|--------|--------|-------|-------|
| 1gd0 | VNTNVPRASVPDGFLS  | Strand | Helix  | 2.24  | 1.86  |
| 1tul | LCNLVQNGEYDLNAI   | Strand | Strand | 1.81  | 1.49  |
| 1kyf | ALLEEVDPNPANFVG   | Strand | Strand | 1.2   | 1.01  |
| 1fdr | YLVTVPDGKLSPR     | Strand | Helix  | 1.69  | 1.3   |
| 1m1n | AGSKGVVWGPIKDMIHI | Helix  | Strand | 2.21  | 1.81  |
| 1ew2 | SESGSPEYRQQSAV    | Helix  | Strand | 1.65  | 1.23  |
| 1m15 | LQTANACRYWPTGRGIF | Helix  | Strand | 1.99  | 1.63  |
| 1aol | NHPLWTWWPVLTPDLCM | Strand | Helix  | 2.24  | 1.84  |
| 1oyz | FRLDDHNSLK        | Helix  | Helix  | 0.793 | 0.538 |
| 1nkr | CWSDVMFEHFL       | Strand | Strand | 0.882 | 0.572 |
| 1ojr | ADIAPYHDNFHQPRYI  | Helix  | Strand | 1.88  | 1.54  |
| 1nls | LKSNSTHETNA       | Strand | Strand | 1.16  | 0.786 |
| 1kqp | QETGDQLTDFN       | Helix  | Helix  | 1.59  | 1.07  |
| 1gxm | FAANKRAPFDTDVFSND | Helix  | Helix  | 2.37  | 2.17  |
| 1g61 | ALISPELKDFKKD     | Strand | Helix  | 1.82  | 1.48  |
| 1jtv | TGSVGGLMGLPFNDVY  | Strand | Helix  | 1.95  | 1.66  |
| 1p4c | ALALGAEAVLL       | Helix  | Strand | 1.39  | 0.914 |
| 1n1p | IDAWDNSDSSVFA     | Strand | Strand | 1.41  | 1.1   |
| 1jm1 | IYALKDGGVVV       | Strand | Strand | 0.729 | 0.48  |
| 1qwn | ILQKSGFKNML       | Helix  | Strand | 0.922 | 0.607 |
| 1fsg | TVLSDDL SIFRDKHVL | Strand | Strand | 2.15  | 1.77  |
| 1brt | DENLGTRISEEA      | Helix  | Helix  | 1.37  | 0.877 |
| 1pqh | DAAGILENEAID      | Helix  | Strand | 1.36  | 0.889 |
| 1ao3 | LLDGSSSFASYF      | Strand | Helix  | 1.31  | 1.04  |
| 1n8k | ESIGEGVTTVRPGDKVI | Strand | Strand | 1.97  | 1.62  |
| 1hyo | TMHLPATIGDYTD     | Strand | Strand | 1.78  | 1.39  |

|      |                   |        |        |       |       |
|------|-------------------|--------|--------|-------|-------|
| 2sns | VKLMYKGQPMTF      | Strand | Strand | 1.28  | 0.85  |
| 1e6i | YDFIKEPMDLST      | Helix  | Helix  | 1.41  | 0.919 |
| 1onw | AVASNIPSDIVPNCTVV | Strand | Strand | 2     | 1.65  |
| 1qw9 | CLAQLVNVIAPIMT    | Strand | Strand | 2.45  | 1.72  |
| 1lc5 | RRQQMPWSVNALA     | Helix  | Helix  | 1.42  | 1.14  |
| 1cnv | VYWGQREDGLLRD     | Strand | Helix  | 1.71  | 1.39  |
| 1ka1 | VVGEESSSGLSDAF    | Strand | Helix  | 2.26  | 1.68  |
| 1e6b | LALKGLDYEYI       | Helix  | Strand | 1.01  | 0.666 |
| 1cun | TLVASEDYGDTLAA    | Helix  | Helix  | 1.54  | 1.15  |
| 1nko | SFSYPVSDTSDPVGHY  | Strand | Strand | 1.91  | 1.75  |
| 1r5r | GKCLPTSGSDNCN     | Helix  | Helix  | 1.53  | 1.2   |
| 1j9b | YEQLGLAEDKFTDDQ   | Helix  | Helix  | 1.57  | 1.31  |
| 1tl2 | LFFSSVGTLEFG      | Strand | Strand | 0.744 | 0.482 |
| 1reg | EITLKKPEDFL       | Strand | Helix  | 0.945 | 0.631 |
| 1uol | IRVEGNLRAEYL      | Strand | Strand | 1.5   | 1.01  |
| 1ig3 | RLHVDTGMEGS       | Strand | Strand | 1.35  | 0.913 |
| 1qw9 | ECDVRSFEDYRVI     | Strand | Strand | 1.39  | 1.09  |
| 1bkr | EDISVDHPDEKS      | Helix  | Helix  | 1.36  | 0.875 |
| 1ufh | LSLHVFAHNQTA      | Strand | Helix  | 1.44  | 0.924 |
| 1am2 | SVRIADIVPGARPNSDN | Strand | Strand | 2.58  | 2.17  |
| 1jm1 | VVSGPAPRPLPIVIL   | Strand | Strand | 1.97  | 1.66  |
| 1jks | EIVNYEPLGLEAD     | Helix  | Helix  | 1.57  | 1.27  |
| 1ql0 | KRTGLIIWAGLPDDV   | Helix  | Helix  | 2.1   | 1.75  |
| 1cv8 | ATYNTNKYHAEA      | Helix  | Helix  | 1.66  | 1.14  |
| 1knm | LDAAGTSNGSKVQI    | Strand | Strand | 1.4   | 1.03  |
| 1g8a | YRIWNPNSKLG       | Strand | Helix  | 1.09  | 0.723 |

|      |                      |        |        |       |       |
|------|----------------------|--------|--------|-------|-------|
| 1m15 | QVRGTRGEHTESEGGVYDI  | Strand | Strand | 2.62  | 2.27  |
| 1euw | VWNRGQDSFTI          | Strand | Strand | 1.08  | 0.712 |
| 1hju | GIKDSSLSPKPKIM       | Helix  | Strand | 1.06  | 0.774 |
| 1tl2 | EVGSGGWSGFKF         | Strand | Strand | 2.03  | 1.36  |
| 1ka1 | VISHKDSTIT           | Helix  | Strand | 1.15  | 0.771 |
| 1uca | WTKHGTCSESTFNQAA     | Helix  | Helix  | 1.83  | 1.54  |
| 1brt | LHGTGDRTLPIENTARV    | Strand | Helix  | 1.92  | 1.56  |
| 1oc7 | LKQLDLPHVAM          | Helix  | Strand | 0.803 | 0.512 |
| 1obo | LHDVSQAEVTDLNDYQYLI  | Strand | Strand | 2.17  | 1.93  |
| 3lzt | IVSDGNGMNAWVAW       | Helix  | Helix  | 1.13  | 0.793 |
| 1qs1 | NFLDNKNDIKT          | Helix  | Helix  | 0.612 | 0.415 |
| 1jhj | RVGNNFHNLQEI         | Strand | Strand | 1.51  | 1     |
| 1fvk | YQLNPQGMDTSNMDV      | Strand | Helix  | 2.01  | 1.65  |
| 1fye | LLLSNSTLPGKAWLEHALPL | Strand | Helix  | 2.33  | 2.19  |
| 1gk9 | NTFGFTPKRWEPFD       | Helix  | Helix  | 2.13  | 1.58  |
| 1ojr | IALTYVLENDTAV        | Helix  | Helix  | 1.62  | 1.28  |
| 1e1a | EVFGPDGGQPKMRI       | Strand | Strand | 1.79  | 1.33  |
| 3sil | YAHNLYSGEVKL         | Strand | Strand | 1.11  | 0.756 |
| 1k3i | ISTDSSISKAS          | Strand | Strand | 1.35  | 0.891 |
| 1gui | KILQNHDPWTNYF        | Strand | Strand | 1.37  | 1.05  |
| 1o2d | ERYRNDSFDFVV         | Helix  | Strand | 1.4   | 0.925 |
| 1ecd | KAHTDFAGAEAA         | Helix  | Helix  | 1.44  | 0.925 |
| 1mpx | ASTSGSDSDWV          | Strand | Strand | 1.13  | 0.755 |
| 1m4l | IDLGIHSREWIT         | Strand | Helix  | 1.82  | 1.21  |
| 1aol | VTHKSSEGFYV          | Helix  | Strand | 1.17  | 0.769 |
| 1e9g | KPVSAFHDIPLYAD       | Strand | Strand | 1.81  | 1.31  |

|      |                    |        |        |       |       |
|------|--------------------|--------|--------|-------|-------|
| 2bop | LKHVPLPPGMNIS      | Helix  | Strand | 0.935 | 0.739 |
| 1hdo | VIVLLGTRNDLSPTTVMS | Strand | Helix  | 2.38  | 2.2   |
| 1tl2 | KIGQGGWDTFKF       | Strand | Strand | 1.51  | 1     |
| 1hbk | INGLPRITINLPNEL    | Helix  | Helix  | 1.84  | 1.29  |
| 1ff4 | WHYVTPKKNYDI       | Strand | Strand | 1.43  | 0.943 |
| 1qj4 | RENLYTLCGPEE       | Helix  | Helix  | 1.17  | 0.773 |
| 1pq7 | HCVSGYAQSGFQI      | Helix  | Strand | 1.27  | 1     |
| 1l2h | KALHLQGQDMEQQVWSM  | Strand | Strand | 2.36  | 2.16  |
| 1oz3 | EAVDRRNPALIRV      | Strand | Strand | 1.27  | 1.02  |
| 1gmx | MRDNDFDTPVMV       | Helix  | Strand | 1.39  | 0.891 |
| 1edg | MCPGYVASPDG        | Strand | Helix  | 1.53  | 1.04  |
| 1k3i | WIPGPDMQVARGYQSSA  | Strand | Strand | 2.38  | 1.98  |
| 1cfz | DGGTAGMELLGD       | Strand | Helix  | 1.43  | 0.977 |
| 1a8d | KLDRCNNNNQYVS      | Strand | Strand | 1.49  | 1.2   |
| 1lb6 | LHLQLPTAQRCANYIS   | Strand | Strand | 1.63  | 1.39  |
| 1pdo | AQLAKLDTTKGVLF     | Helix  | Strand | 1.37  | 0.962 |
| 1qnt | TTLDSPLGKLEL       | Strand | Strand | 0.609 | 0.409 |
| 1em2 | EKNNEYGDTVY        | Strand | Strand | 1.12  | 0.761 |
| 1f8e | CISGPNNNASAV       | Strand | Strand | 1.33  | 0.866 |
| 1gxm | AWFNSPRTYLEG       | Helix  | Strand | 0.728 | 0.49  |
| 1mi8 | RVSIKDLLDEKDFEIW   | Strand | Strand | 2.28  | 1.86  |
| 1hzt | TRRALSKKAWPGVWTN   | Strand | Strand | 2.34  | 1.92  |
| 1aoc | FGYTVAGEFRV        | Strand | Strand | 0.853 | 0.562 |
| 1h2w | VLVPEHEKDVLE       | Strand | Strand | 1.49  | 0.975 |
| 1qst | FKKQGFTKEHRMPQEK   | Helix  | Helix  | 1.83  | 1.49  |
| 1k4n | EIVLPGDPETLNA      | Strand | Helix  | 1.45  | 1.16  |

|      |                      |        |        |       |       |
|------|----------------------|--------|--------|-------|-------|
| 1qst | DILTNDGTHRN          | Strand | Helix  | 0.667 | 0.446 |
| 1gxr | NTLNHGEVVCAVT        | Strand | Strand | 1.67  | 1.35  |
| 1eb6 | KEAGSTSGGSTTYH       | Helix  | Strand | 1.61  | 1.19  |
| 1hqk | QIYEGKLTAEGLRFGI     | Strand | Strand | 1.94  | 1.63  |
| 1gpp | NVLMADGSIEC          | Strand | Strand | 0.579 | 0.37  |
| 1kqp | AVRLPHGTQQDEDD       | Strand | Helix  | 1.29  | 0.923 |
| 1fi2 | FVIPRGLMHFQ          | Strand | Strand | 1.05  | 0.669 |
| 1okc | KDEGPKAFFKGAWS       | Helix  | Helix  | 1.83  | 1.36  |
| 1mof | DLLFLKEGGLCA         | Helix  | Helix  | 1.3   | 0.848 |
| 2mjp | NIILKDLKDVEIEQ       | Helix  | Strand | 1.35  | 0.961 |
| 1mrj | TEAAKYVFKDAMRKV      | Helix  | Strand | 1.77  | 1.51  |
| 1hxn | TELPWPHEKVDGAL       | Strand | Strand | 1.52  | 1.13  |
| 1me4 | GYNDSAAVPYWI         | Strand | Strand | 1.06  | 0.725 |
| 1odz | NAVGDFAAVYG          | Helix  | Strand | 1.3   | 0.832 |
| 4eug | FRFTELGDVKVVI        | Helix  | Strand | 1.52  | 1.2   |
| 1moq | ALMTNAGTEIGVASTKAF   | Strand | Helix  | 2.5   | 2.24  |
| 1o9g | VTDRSRKIPVAPVKALERL  | Strand | Strand | 2.61  | 2.34  |
| 1d5t | MISYAHNVAAQGYIA      | Strand | Strand | 2.15  | 1.79  |
| 1ezm | MLFGDGATMFYPLVSLDV   | Strand | Helix  | 2.43  | 2.21  |
| 1pzt | LAFRGMSVSRPNAVIGKTR  | Helix  | Strand | 2.83  | 2.46  |
| 1m4l | FELRDTGRYGFLLPASQIIP | Strand | Helix  | 2.63  | 2.53  |
| 1qau | VKERVSKPPVII         | Strand | Strand | 1.48  | 0.995 |
| 1jo8 | GELEKDGSKGL          | Strand | Strand | 0.901 | 0.576 |
| 1fi2 | TELDVAEWPGTNTLGVSMN  | Strand | Strand | 2.34  | 2.13  |
| 1dm9 | LWAARFYKTRAL         | Helix  | Helix  | 1.4   | 0.939 |
| 1edg | GECEAVDKNNLKT        | Strand | Helix  | 1.68  | 1.33  |

|      |                     |        |        |       |       |
|------|---------------------|--------|--------|-------|-------|
| 1lk9 | KTQKGTMRDLNT        | Helix  | Helix  | 1.34  | 0.913 |
| 1luq | QYVGGAEARIN         | Strand | Strand | 0.934 | 0.624 |
| 1i4z | MQASQYQFYDE         | Helix  | Helix  | 1.14  | 0.752 |
| 1c7k | YEGNDSRGSYQAQ       | Strand | Strand | 1.41  | 0.907 |
| 1htw | LIEWSEKGGQILPEADILV | Strand | Strand | 2.01  | 1.76  |
| 1ql0 | IFINNSPAVNHYAA      | Strand | Strand | 1.64  | 1.22  |
| 1j1v | DLLSKRRRSRV         | Helix  | Helix  | 0.884 | 0.573 |
| 1jhs | LLETVDKSDLKE        | Strand | Helix  | 1.5   | 1.02  |
| 1k5n | LRYYNQSEAGSHTLQ     | Helix  | Strand | 1.75  | 1.48  |
| 1h2c | THFGKATNPLVR        | Strand | Strand | 1.06  | 0.701 |
| 1i3j | RVKSDKWNWFY         | Helix  | Strand | 1.06  | 0.718 |
| 1pgs | IDVLNNSLTGSTFS      | Strand | Strand | 1.95  | 1.41  |
| 1p4o | GVVSQGGQPTLVI       | Strand | Strand | 1.1   | 0.707 |
| 1lqt | VIVGRRGPLQAAFTTLE   | Strand | Helix  | 2.55  | 2.07  |
| 1f86 | WKALGISPFHEH        | Helix  | Strand | 0.921 | 0.619 |
| 1n55 | LYGGSVNAANAAT       | Strand | Helix  | 1.31  | 1.05  |
| 1cl2 | KRDFTGSSGLFS        | Helix  | Strand | 1.8   | 1.23  |
| 1g2q | VMELDFLKGRSKLNAPVFT | Strand | Strand | 2.48  | 2.23  |
| 1m1s | VKSSNNEHYRV         | Strand | Strand | 0.851 | 0.569 |
| 1b4u | YLDEWNLTPAA         | Helix  | Helix  | 1.05  | 0.67  |
| 1od3 | IFSLPGGGSIAI        | Strand | Strand | 0.586 | 0.392 |
| 1ds1 | NAEGSEDGHELL        | Helix  | Strand | 1.82  | 1.23  |
| 1by2 | QALGRAAFGQSGPIML    | Strand | Strand | 3.1   | 2.61  |
| 1o9g | LTAEGGALPCAI        | Helix  | Strand | 1.43  | 0.947 |
| 1gpq | QMVQGHKLPWVM        | Helix  | Helix  | 1.54  | 1.2   |
| 1ujp | YLTAGFPSREG         | Strand | Helix  | 1.32  | 0.846 |



|      |                       |        |        |       |       |
|------|-----------------------|--------|--------|-------|-------|
| 1dcs | HHVAAPIAGSSRTS        | Strand | Strand | 2.35  | 1.7   |
| 1dqz | ANKGVSPGTGNAAV        | Helix  | Strand | 1.69  | 1.37  |
| 1dk0 | VNYDSSFGGYSIHD        | Strand | Helix  | 1.85  | 1.32  |
| 1hx0 | FSISNSAEDPFIA         | Strand | Strand | 1.61  | 1.25  |
| 1dci | LQRLPKVIGNRSL         | Helix  | Helix  | 1.46  | 1.17  |
| 1luq | LTSGTTEANAWKSTLV      | Strand | Strand | 1.59  | 1.3   |
| 1lc5 | RHHQVPASWILA          | Helix  | Strand | 1.48  | 0.952 |
| 1lri | KTLVSILSDASF          | Helix  | Helix  | 0.943 | 0.606 |
| 1ig3 | VSGDFDSIRPEV          | Strand | Helix  | 1.15  | 0.764 |
| 1d7p | SWVHQIALRME           | Strand | Strand | 1.86  | 1.24  |
| 1lfc | FKRVDNGKELI           | Strand | Strand | 1.04  | 0.665 |
| 1jr8 | NEYLKDKDIYDCATILE     | Helix  | Helix  | 2.38  | 2.01  |
| 1o9g | ALARLPGDGPVTL         | Helix  | Strand | 1.55  | 1.26  |
| 1qq5 | VVFDAYGTLFDVQSVADA    | Strand | Helix  | 1.98  | 1.79  |
| 1g9o | CLEKGPNGYGFHL         | Strand | Strand | 2.1   | 1.68  |
| 1oa9 | TSTGGDLGNSHFD         | Strand | Strand | 1.82  | 1.4   |
| 1b5e | IMIYTRPSMQF           | Strand | Helix  | 1.49  | 0.998 |
| 1bkr | HKHRPDLIDFDKLLKKSNAHY | Helix  | Helix  | 2.78  | 2.68  |
| 1h2w | LHDLATGALLK           | Strand | Strand | 0.875 | 0.576 |
| 1hxh | QASLPKGVSKEM          | Helix  | Helix  | 1.19  | 0.801 |
| 1bqc | LEVHDTTGYGEQSGASTLDQ  | Strand | Helix  | 3.07  | 2.93  |
| 1nn5 | FTGAKENFSLDW          | Helix  | Helix  | 1.2   | 0.792 |
| 1kd0 | LVADWCNTVED           | Strand | Helix  | 1.24  | 0.799 |
| 1n7o | IVKYDDSVSTI           | Strand | Strand | 1.24  | 0.814 |
| 1bx4 | KTQALPKMNSKRQRIVI     | Helix  | Strand | 1.86  | 1.58  |
| 1p4c | VLIDSGFRRGSD          | Strand | Helix  | 1.44  | 0.938 |

|      |                      |        |        |       |       |
|------|----------------------|--------|--------|-------|-------|
| 1ifr | RQNGDDPLTTY          | Strand | Strand | 1.14  | 0.738 |
| 1ddw | WVPTSKHAVTV          | Strand | Strand | 1.2   | 0.769 |
| 1nn5 | WCKQPDVGLPKPDLVL     | Helix  | Strand | 1.96  | 1.64  |
| 1o08 | KILDLADKKVSAEE       | Helix  | Helix  | 1.35  | 0.962 |
| 1btn | KLRLSDGNEYL          | Strand | Strand | 0.544 | 0.363 |
| 1izm | QFSNDNHAYPTGLVQP     | Helix  | Helix  | 2.13  | 1.77  |
| 1qqq | LQLSREPRPLPKLI       | Helix  | Strand | 1.48  | 1.09  |
| 1h97 | KELGPHVDTPAH         | Helix  | Helix  | 1.68  | 1.08  |
| 1qwg | VEISDGSSDISLEE       | Strand | Helix  | 1.75  | 1.23  |
| 1a3c | DITLYRNDEPLVK        | Strand | Strand | 1.69  | 1.35  |
| 1ojr | LWGLTNEAVPTSELPA     | Strand | Helix  | 2.5   | 2.11  |
| 1yac | IAGVVTEVCVAFP        | Strand | Helix  | 2.21  | 1.79  |
| 1mby | QKLQLLSSILL          | Helix  | Strand | 1.27  | 0.824 |
| 1l9l | ATRVCRTRGRSRW        | Helix  | Helix  | 1.46  | 0.993 |
| 1jnr | TLVEKAAVERSGAVAQGLSA | Strand | Strand | 2.53  | 2.43  |
| 1ufh | IHAPEHPQQEAF         | Strand | Strand | 1.44  | 1.12  |
| 1gkl | MPLSGDYWYGNSPQD      | Strand | Helix  | 1.93  | 1.62  |
| 1i8n | QINTETNECYR          | Strand | Strand | 1.16  | 0.738 |
| 1gyc | ANPNFGTVGFAGGINS AI  | Strand | Strand | 2.42  | 2.21  |
| 1ka1 | TLEGVEKGHSSHDE       | Strand | Helix  | 1.92  | 1.41  |
| 1qw9 | RIAHGYKEPHKIKTWC     | Helix  | Strand | 1.72  | 1.47  |
| 1lj8 | EIFGTAIPNSPEF        | Helix  | Helix  | 1.64  | 1.31  |
| 1lqt | LRELADLDGVDV         | Helix  | Strand | 1.24  | 0.819 |
| 1fj2 | YTALTQKLAGVT         | Helix  | Strand | 1.55  | 1.12  |
| 1lug | SVSYDQATSLR          | Strand | Strand | 1.46  | 0.959 |
| 1el6 | VTYLDNQKHVLSYST      | Strand | Strand | 2.15  | 1.79  |

|       |                    |        |        |       |       |
|-------|--------------------|--------|--------|-------|-------|
| 1oe1  | IVFNGKVGALTGANALTA | Strand | Strand | 2.58  | 2.39  |
| 1i4z  | ALDNWKGDVKW        | Helix  | Helix  | 1.22  | 0.814 |
| 1p1m  | DILNIGLKEVKTIA     | Helix  | Strand | 1.94  | 1.44  |
| 1qq5  | FVVPALGDLPR        | Strand | Helix  | 1.28  | 0.819 |
| 1aol  | LRLYVSGRDPGLT      | Strand | Strand | 1.46  | 1.13  |
| 1oqv  | LVSLGKISSDE        | Helix  | Helix  | 0.304 | 0.194 |
| 1llf  | VSSAGCGSASDKLA     | Helix  | Helix  | 1.85  | 1.3   |
| 1llf  | WQDYLLGSGSVI       | Helix  | Helix  | 1.57  | 1.04  |
| 1h2w  | GYSGQKKDTEIF       | Strand | Strand | 1.42  | 0.91  |
| 1qw9  | DHTYDHDVDYIS       | Helix  | Strand | 1.42  | 0.948 |
| 1cl2  | SILAFIEQGDHVL      | Helix  | Strand | 1.17  | 0.901 |
| 1qks  | HVIKDERLVTPTG      | Strand | Strand | 1.49  | 1.15  |
| 1it6  | ICRAHQVVEDGYEF     | Strand | Strand | 1.62  | 1.2   |
| 1fvk  | AADVQLRGVPAMF      | Helix  | Strand | 1.64  | 1.28  |
| 1f9y  | FEIAPELVFPDGEMLRQ  | Helix  | Helix  | 2.08  | 1.73  |
| 1lbu  | EILGPGYPGHNDHTHV   | Strand | Strand | 1.71  | 1.39  |
| 8abp  | QVPTKSNIPG         | Strand | Helix  | 0.917 | 0.613 |
| 1llf  | YTGKDNFRTAG        | Strand | Helix  | 1.19  | 0.769 |
| 1mla  | QEAVPEGTGAM        | Helix  | Strand | 1.43  | 0.928 |
| 1kd0  | TYTGSTVTEGFTQVRQK  | Strand | Strand | 2.04  | 1.73  |
| 1ogw  | TLEVEPSDTIEN       | Strand | Helix  | 1.41  | 0.909 |
| 1lipi | FIEVSPKIEKFVF      | Strand | Strand | 1.37  | 1.07  |
| 1k4n  | ELPWPGEKRYPHGEWE   | Strand | Strand | 2.21  | 1.84  |
| 1a6q  | EEIHKGVPLVH        | Helix  | Helix  | 1.58  | 1.02  |
| 1ooh  | LMAGTVNKKGEFNAPK   | Helix  | Helix  | 1.67  | 1.41  |
| 1hdo  | TVTLDGRGPSRVIS     | Strand | Strand | 1.65  | 1.16  |

|      |                  |        |        |       |       |
|------|------------------|--------|--------|-------|-------|
| 1mi8 | WKRLDELSLKEHIA   | Strand | Strand | 1.82  | 1.3   |
| 1k7j | FFYIHPDNPQQRL    | Strand | Helix  | 1.3   | 1.01  |
| 1o4y | TDYQPMGDATWYY    | Strand | Strand | 1.77  | 1.41  |
| 1bqc | VSHPHNWYPQHTQAF  | Strand | Helix  | 1.79  | 1.52  |
| 1ezj | LTSLGVIQSAQE     | Helix  | Helix  | 1.07  | 0.699 |
| 1qnr | NAFGGNATTWYTNTAA | Helix  | Helix  | 1.94  | 1.57  |
| 1n55 | TLYAKPDINGFL     | Helix  | Strand | 0.951 | 0.611 |
| 1e9g | VEIPRWTNAKLEI    | Strand | Strand | 1.68  | 1.29  |
| 1ao3 | LVDVMQREGGPSQIGD | Helix  | Helix  | 2.33  | 1.96  |
| 1mka | KMTETGGNFDKGYVE  | Strand | Strand | 2.16  | 1.78  |
| 1g64 | ALNARPGHQTVI     | Helix  | Strand | 1.17  | 0.788 |
| 1kqp | IREEGGDAQFI      | Helix  | Strand | 1.54  | 0.986 |
| 1lbu | AQAARNHGFTEIL    | Helix  | Strand | 1.52  | 1.17  |
| 1luq | GRYDSAPATDGSGTAL | Strand | Strand | 2.03  | 1.69  |
| 1ppr | AIGSISGPNQVTSRAD | Helix  | Helix  | 2.26  | 1.85  |
| 1fg7 | CRTVPTLDNWQLDLQG | Strand | Helix  | 2.23  | 1.88  |
| 1p1m | VIDLDLPEMFVQNIKN | Strand | Helix  | 2.57  | 2.11  |
| 1qs1 | LQVPKGSTGAY      | Strand | Strand | 1.45  | 0.972 |
| 1edg | ETSWSGIKTTKQM    | Helix  | Helix  | 1.38  | 1.12  |
| 8abp | VAKDVEPPKFTE     | Helix  | Strand | 0.891 | 0.573 |
| 1pa9 | LAENRTPVLAV      | Helix  | Strand | 1.16  | 0.774 |
| 1gui | SFELGEGTATTIY    | Strand | Strand | 1.54  | 1.2   |
| 1hh8 | ALIQLRGNQLID     | Helix  | Strand | 1.27  | 0.828 |
| 1k3i | VVTGGNDAKKTSL    | Strand | Strand | 1.68  | 1.36  |
| 1n8k | WKGAIFFGGFKSKD   | Strand | Helix  | 2.27  | 1.84  |
| 1p35 | CVLKPGFENGSNQVL  | Strand | Strand | 1.45  | 1.24  |

|      |                   |        |        |      |       |
|------|-------------------|--------|--------|------|-------|
| 1kqp | LKELGAPERLY       | Helix  | Helix  | 0.55 | 0.373 |
| 1eom | MMIYTYNSNVSY      | Strand | Helix  | 1.2  | 0.817 |
| 1aly | LCLKSPGRFERIL     | Strand | Strand | 1.42 | 1.14  |
| 1onw | LPTHVNRNVPL       | Strand | Helix  | 1.46 | 0.948 |
| 1o26 | EVARIVLPLNLYTR    | Helix  | Strand | 2.01 | 1.47  |
| 1m15 | LIDDHFLFKEGDRFL   | Helix  | Helix  | 2.12 | 1.78  |
| 1kpt | SDPLYAGNDVSRGQLT  | Strand | Strand | 2.41 | 2.06  |
| 1r5r | LEAFSLVDDEANVDEDI | Helix  | Helix  | 2.43 | 1.98  |
| 1iab | VSLQANGCVYHGT     | Strand | Helix  | 1.51 | 1.19  |
| 1gye | VVSTGTPAAGDNVT    | Strand | Strand | 1.93 | 1.41  |
| 1o26 | MKHGHETPFEHIVFT   | Helix  | Strand | 1.8  | 1.5   |
| 1jcl | GFKPAGGVRTAED     | Strand | Helix  | 1.79 | 1.45  |
| 1dj7 | VKNTFWNCPCVPM     | Helix  | Helix  | 1.84 | 1.48  |
| 1k7c | VVNDAVAGRSARS     | Strand | Helix  | 1.62 | 1.28  |
| 1uhn | LAESGMNLKDTV      | Helix  | Helix  | 1.49 | 0.985 |
| 1dfm | DELVPKHWKNN       | Helix  | Strand | 1.45 | 0.984 |
| 1iof | ATKGYPKMSGFIH     | Helix  | Strand | 1.82 | 1.41  |
| 1mpx | QYLVDGAPKADTPPVFI | Helix  | Strand | 2.14 | 1.8   |
| 1m2i | EEIQKHNSKSTWLI    | Helix  | Strand | 1.81 | 1.54  |
| 1ug6 | ALEERGGWRSRET     | Helix  | Helix  | 1.07 | 0.832 |
| 1jbe | NKLQAGGYGFVI      | Helix  | Strand | 1.28 | 0.86  |
| 2lis | KIDALGRTPVVGD     | Helix  | Helix  | 1.44 | 1.15  |
| 1dqg | WECKNDTLFGI       | Strand | Strand | 1.67 | 1.1   |
| 1k3x | AGLLLDQAFLAGLGNL  | Helix  | Helix  | 2.1  | 1.72  |
| 1eyh | KRLNDHGKNWRH      | Helix  | Helix  | 1.24 | 0.845 |
| 1qhd | LQNRRTGTGFTF      | Helix  | Strand | 1.68 | 1.12  |

|      |                   |        |        |       |       |
|------|-------------------|--------|--------|-------|-------|
| 1ecd | SIMAKFTQFAGKDLES  | Helix  | Helix  | 2.2   | 1.87  |
| 1ig3 | LVVLNQPLDARFRH    | Strand | Helix  | 1.63  | 1.2   |
| 1hzi | SLTEQKTLCTELTVT   | Helix  | Strand | 1.25  | 1.04  |
| 1p35 | VQSLILPSSFKNSEKVL | Helix  | Strand | 2.26  | 1.84  |
| 1e7l | LQRGFEYNESDTKTQ   | Helix  | Helix  | 1.91  | 1.59  |
| 1ht6 | RKRNGITATSALKI    | Helix  | Strand | 1.87  | 1.35  |
| 1pdo | MARDDDPSFDE       | Helix  | Helix  | 0.999 | 0.668 |
| 1ayl | FLTADAFGVLPVSR    | Strand | Strand | 1.75  | 1.49  |
| 1moq | RLSKELGYLGSL      | Helix  | Strand | 0.832 | 0.551 |
| 1ujp | EEVLPYADLLEI      | Helix  | Strand | 1.88  | 1.26  |
| 1d3v | DIMEVNPTLGKTPEE   | Strand | Helix  | 1.79  | 1.51  |
| 1thx | ANTYSDRLKVV       | Helix  | Strand | 1.31  | 0.864 |
| 1q2y | AADGGASGFIL       | Helix  | Strand | 1.21  | 0.807 |
| 1c7g | FVYEPKQLRFF       | Strand | Helix  | 1.48  | 1.01  |
| 1h32 | AVWDRPEGTEGKACAD  | Helix  | Helix  | 1.5   | 1.21  |
| 1mpx | KDLLSAGDDVF       | Helix  | Helix  | 1.31  | 0.887 |
| 1okg | SEVADHLAEYRIV     | Helix  | Strand | 1.57  | 1.23  |
| 1edg | YNKYTSRGIPVII     | Helix  | Strand | 1.23  | 0.95  |
| 1eaj | INVTNLQLSDIGTY    | Strand | Strand | 2.06  | 1.53  |
| 1b3a | YFYTSGKCSNPAVVF   | Strand | Strand | 1.45  | 1.19  |
| 1d5t | STTVETTDPEK       | Strand | Helix  | 1.24  | 0.818 |
| 1jcl | AICIYPRFIPI       | Strand | Helix  | 0.984 | 0.648 |
| 1muw | DELAQPTAADGVQE    | Helix  | Helix  | 1.35  | 0.961 |
| 1qqh | SECEKYGNTGTWEV    | Helix  | Strand | 1.75  | 1.27  |
| 1hkf | VTSSKPRTMAWTSRFTI | Strand | Strand | 2.06  | 1.71  |
| 1yac | TTSAETGPNGPLPEL   | Strand | Helix  | 2.26  | 1.83  |

|      |                      |        |        |       |       |
|------|----------------------|--------|--------|-------|-------|
| 1lli | KILKVSVEEFSPSI       | Helix  | Helix  | 1.39  | 1.03  |
| 1jlx | YLFAESSQIDTGSKDVFHV  | Strand | Strand | 2.67  | 2.37  |
| 1gxr | VWDISHPGNKSPVSQL     | Strand | Strand | 1.41  | 1.14  |
| 1jks | IMLLDRNVKPRIKI       | Strand | Strand | 1.24  | 1.03  |
| 1jf8 | FISTGNSARSQ          | Strand | Helix  | 1.26  | 0.845 |
| 1g64 | EFQVMATGFTWETQNREA   | Strand | Helix  | 2.39  | 2.11  |
| 1o2d | DEVEENPSFDN          | Strand | Helix  | 1.24  | 0.819 |
| 1odz | WANNLKDEQGRLLIPVIF   | Helix  | Strand | 2.23  | 1.83  |
| 1it6 | VTLFSAPNYCGEFDNAGAM  | Strand | Strand | 2.02  | 1.81  |
| 1qqf | DICEGQVNSLPG         | Helix  | Helix  | 0.96  | 0.636 |
| 1m65 | TDHGPDMEAPHHWHF      | Strand | Helix  | 2.03  | 1.64  |
| 1ks8 | ADHAFWGRPEDMTMARPAYK | Helix  | Strand | 2.62  | 2.52  |
| 1orn | MKIIPKEEWSI          | Helix  | Helix  | 0.788 | 0.527 |
| 1ojr | VGILPWMVPGTDAI       | Strand | Helix  | 1.64  | 1.18  |
| 1g8a | RLNLEPYEKDHAL        | Strand | Strand | 1.68  | 1.31  |
| 1c7k | LRAGGNADFSY          | Strand | Strand | 1.62  | 1.08  |
| 1a8e | FLKVPPRMDAKM         | Strand | Helix  | 1.34  | 0.886 |
| 1o98 | IILDGFALRDETYGNAVA   | Strand | Helix  | 1.71  | 1.55  |
| 1uol | VVPYEPPEVGSDDCTTI    | Strand | Strand | 1.57  | 1.34  |
| 1eu8 | GLHNADDSPVKGKVG      | Helix  | Strand | 1.65  | 1.39  |
| 1kv7 | IYNQLTEETTLHWH       | Strand | Strand | 1.49  | 1.05  |
| 2arc | VYFRPRAYWHEWLNWPSIF  | Strand | Strand | 2.86  | 2.6   |
| 1pgs | YVKNKTTGEWYE         | Strand | Strand | 1.38  | 0.917 |
| 1bbp | AYPVGDSKIGKIY        | Strand | Strand | 1.31  | 1.03  |
| 1ufy | AITVEEDTPEA          | Strand | Helix  | 1.57  | 1.07  |
| 1oqq | SRLSCQIIMTPELDGIVV   | Strand | Strand | 2.41  | 2.23  |

|      |                     |        |        |       |       |
|------|---------------------|--------|--------|-------|-------|
| 2pth | SFFRINPDEILV        | Helix  | Strand | 1.31  | 0.884 |
| 1jub | IQESDFSGITE         | Helix  | Strand | 1.07  | 0.697 |
| 1h2w | SIREGCDPVNRLW       | Strand | Strand | 0.968 | 0.775 |
| 1dcs | FTDLPYRPDAVLV       | Strand | Strand | 1.57  | 1.22  |
| 1q35 | VYSYRQPYLIEPM       | Strand | Helix  | 2.04  | 1.57  |
| 1lc5 | LIDNLDCIERYPDADYFHL | Helix  | Helix  | 2.9   | 2.54  |
| 1hzt | AARTTSALQINDDEVMD   | Strand | Strand | 2.22  | 1.83  |
| 1c7g | KLYQHKEDIRGLTF      | Helix  | Strand | 1.65  | 1.21  |
| 1qs1 | EITFSMAGSFEDE       | Helix  | Helix  | 1.35  | 1.04  |
| 1jig | ILALEGKPLATMKE      | Helix  | Helix  | 2.31  | 1.72  |
| 1dl2 | LAQSKPSSLWYI        | Strand | Strand | 1.25  | 0.814 |
| 1mpx | VLPKGAKNAPI         | Strand | Strand | 1.01  | 0.658 |
| 8abp | KAAGFPEKQIYQ        | Helix  | Strand | 0.827 | 0.564 |
| 1r5l | IYRIAHWDPKVFTAYD    | Strand | Helix  | 1.94  | 1.65  |
| 1d4o | AEAGVPYDIVLE        | Helix  | Strand | 1.18  | 0.783 |
| 1qu9 | VEAAGLKVGDIVK       | Helix  | Strand | 1.43  | 1.1   |
| 1nls | SYDVDLDNVLPEWVR     | Strand | Strand | 1.91  | 1.57  |
| 1ufh | SLKLNEKDIVG         | Strand | Strand | 1.61  | 1.09  |
| 1kte | LSQLPFKEGLLEF       | Helix  | Strand | 1.42  | 1.12  |
| 1e7l | LDHDHELNGPKAGKVRG   | Strand | Strand | 1.89  | 1.57  |
| 1o97 | VRVWDDAAEGSDAIV     | Strand | Helix  | 2.1   | 1.71  |
| 1bg8 | DFLAVDESFQPT        | Helix  | Helix  | 0.564 | 0.38  |
| 1m4l | IGRSYEGRPIY         | Strand | Strand | 0.422 | 0.282 |
| 1n7o | QKGAWKDINEGQSDKEVEN | Strand | Strand | 2.36  | 2.12  |
| 1a6m | ETLEKFDRFKHLKTEAE   | Helix  | Helix  | 2.05  | 1.7   |
| 1l9y | FLGSHAGMFDLKN       | Strand | Helix  | 1.3   | 1.06  |



|      |                       |        |        |       |       |
|------|-----------------------|--------|--------|-------|-------|
| 1gqo | AVSSISLPVVE           | Helix  | Strand | 0.738 | 0.493 |
| 1gpi | VVLDSNWRWVHS          | Strand | Strand | 0.999 | 0.652 |
| 1jk3 | YRINNYTPDMNRED        | Strand | Helix  | 1.83  | 1.31  |
| 3tss | QTHGLYRSSDKTGGYW      | Helix  | Strand | 2.26  | 1.9   |
| 1fkm | NILKDKTIINQQD         | Helix  | Helix  | 1.3   | 1.01  |
| 1ks8 | IKAHTSQNEFYG          | Helix  | Strand | 1.46  | 0.939 |
| 1uca | CRTDPQTKVSYL          | Strand | Strand | 1.5   | 0.979 |
| 1aox | LNRNALDTKNL           | Helix  | Helix  | 1.65  | 1.06  |
| 1aol | VCKDNKWCNPLAI         | Helix  | Strand | 1.26  | 0.987 |
| 3sil | YKSTDDGVTFSKV         | Strand | Strand | 1.88  | 1.53  |
| 1byi | VANDVTPPGKRHAE        | Strand | Helix  | 1.99  | 1.42  |
| 1qau | LRGIASETHVV           | Helix  | Strand | 1.44  | 0.977 |
| 1qtw | WIMQDDRFDGIPLI        | Helix  | Strand | 1.5   | 1.08  |
| 1f7l | KAFGTGIGRQLSFQDIEIR   | Helix  | Strand | 2.76  | 2.42  |
| 1ecs | CKSVGIQETSSGYPRIH     | Helix  | Strand | 2.05  | 1.67  |
| 1fg7 | QYAGVKPEQVLV          | Helix  | Strand | 1.1   | 0.741 |
| 1k4i | VVLDDPSRENEADL        | Strand | Strand | 1.73  | 1.24  |
| 1k3i | FVMNSAGVPSVASTI       | Strand | Strand | 1.44  | 1.2   |
| 1ogo | ASPFLPSGMIPHMTDPDNTQT | Strand | Strand | 2.57  | 2.39  |
| 1hzi | TVTDIFAASKNTTEKE      | Strand | Helix  | 1.97  | 1.6   |
| 1n8k | IGVDINKDKFAK          | Strand | Helix  | 1.25  | 0.818 |
| 1c7g | WAGMMIGDEAYAGSENF     | Helix  | Helix  | 2.41  | 2     |
| 1it6 | WGENDRGVSFTF          | Strand | Strand | 1.28  | 0.876 |
| 1gyc | YHSHLSTQYCDGLRGP      | Strand | Strand | 2.28  | 1.87  |
| 3lzt | MKRHGLDNYRGYSLGN      | Helix  | Helix  | 1.7   | 1.42  |
| 1lk9 | VVAHAPFYVPVF          | Strand | Helix  | 1.21  | 0.795 |

|      |                      |        |        |       |       |
|------|----------------------|--------|--------|-------|-------|
| 1ix9 | STANQDSPLMGEAI       | Strand | Helix  | 1.8   | 1.29  |
| 1ds1 | EAVYLEPGDLLI         | Strand | Strand | 1.17  | 0.778 |
| 1c7g | LREAGVPIVEPTGGHAVF   | Helix  | Strand | 1.64  | 1.5   |
| 1f9v | KIFDQQDTNVD          | Strand | Helix  | 1.31  | 0.889 |
| 1a8d | KLYDDKNASLG          | Strand | Strand | 1.19  | 0.81  |
| 2cpo | NELDFPGWFTESKPI      | Helix  | Helix  | 1.89  | 1.61  |
| 1a6q | CLYKGSRDNMSV         | Helix  | Strand | 1.11  | 0.76  |
| 3sil | ARSTDGGKTWNKK        | Strand | Strand | 1.71  | 1.35  |
| 1lb6 | HTMQGEYDSHLPWPFQGTIR | Strand | Strand | 2.67  | 2.52  |
| 1jr8 | LLARFPDEPTPEE        | Helix  | Helix  | 1.24  | 0.978 |
| 1i40 | YGYINHTLSLDGDPVDVL   | Strand | Strand | 2.17  | 1.96  |
| 1p1m | NEWNGFEGRIFV         | Helix  | Strand | 1.05  | 0.685 |
| 2arc | YGRHPEAREWY          | Strand | Strand | 1.88  | 1.27  |
| 1qks | MIDLWMKEPTTVA        | Strand | Strand | 1.59  | 1.26  |
| 1j22 | VVDSRELRSEVV         | Strand | Helix  | 1.32  | 0.887 |
| 2ilk | QMKDQLDNLLLKESL      | Helix  | Helix  | 1.98  | 1.63  |
| 1oaa | SYAPGPLDNMQ          | Strand | Helix  | 1.4   | 0.944 |
| 1jfb | QVKLFDGSLAW          | Strand | Strand | 1.22  | 0.778 |
| 1ayo | VSYIGSRPASNMAIV      | Strand | Strand | 1.67  | 1.36  |
| 1qks | GEFNKDGTEVW          | Strand | Strand | 1.2   | 0.789 |
| 1c7g | RRFCPHLTQDQFPAQ      | Helix  | Helix  | 1.52  | 1.3   |
| 1jub | AFYTRLKPEIQII        | Helix  | Strand | 1.11  | 0.887 |
| 1dqe | DFYNFWKEGYEIKNRET    | Helix  | Helix  | 2.15  | 1.75  |
| 1omr | EDTKHLPEDENTPEK      | Helix  | Helix  | 1.58  | 1.35  |
| 1ew4 | WICDRSGETFWD         | Strand | Helix  | 0.988 | 0.675 |
| 1thx | ESEVLKAEQPVLV        | Helix  | Strand | 1.45  | 1.12  |

|      |                    |        |        |      |       |
|------|--------------------|--------|--------|------|-------|
| 1eu8 | LEKYGYSKPPETWQE    | Helix  | Helix  | 1.89 | 1.53  |
| 1odm | LYQSNVQNLQV        | Strand | Strand | 1.44 | 0.965 |
| 1p4o | ASVMKEFNCHHVRLLG   | Helix  | Strand | 1.74 | 1.46  |
| 1ug6 | YQIEGATQEDGRGPSIWD | Helix  | Helix  | 2.23 | 2.02  |
| 1it2 | HKTVMFKVDSIWFK     | Helix  | Helix  | 1.77 | 1.39  |
| 1n7o | DFTNWNQTLTA        | Strand | Strand | 1.29 | 0.865 |
| 1ayo | TVKMLERSNVSR       | Helix  | Strand | 1.15 | 0.736 |
| 1ubk | LKNKAAPELDSLNRPTMF | Helix  | Helix  | 2.22 | 1.96  |
| 1jo8 | NIEFVDDDDWWL       | Strand | Strand | 1.06 | 0.722 |
| 2lis | RVHGRTLSTVQ        | Helix  | Helix  | 1.5  | 0.973 |
| 3mag | LSIYTGENMRLTR      | Strand | Strand | 1.41 | 1.1   |
| 1f94 | WLNKISNERWL        | Strand | Strand | 1.28 | 0.867 |
| 1eif | GIGIFEKVKKE        | Strand | Strand | 1.19 | 0.784 |
| 1b65 | STYQTDDDFLWIMPVVA  | Helix  | Strand | 1.83 | 1.49  |
| 1nxm | ARPVEAIPGMLEF      | Strand | Strand | 1.82 | 1.46  |
| 1j53 | RKMFPGKRNSLDA      | Helix  | Helix  | 1.2  | 0.934 |
| 1ayl | EIYNAIRRDALLE      | Helix  | Strand | 1.27 | 0.995 |
| 1ug6 | ELVARPLDFLG        | Helix  | Strand | 1.16 | 0.751 |
| 1is3 | GVVNSNATRFS        | Strand | Strand | 1.41 | 0.954 |
| 1mpl | QVMSHRSGLYDYTND    | Helix  | Helix  | 1.67 | 1.36  |
| 1ofz | YCVNKDNILSE        | Strand | Strand | 1.02 | 0.671 |
| 1e5k | YLQAGERRVMV        | Helix  | Helix  | 0.91 | 0.609 |
| 1ayl | NYLLPLKGIASM       | Helix  | Strand | 0.88 | 0.6   |
| 1i8n | LTKTEFTSVDE        | Strand | Helix  | 1.24 | 0.84  |
| 3lzt | TNRNTDGSTDY        | Strand | Strand | 1.06 | 0.711 |
| 1es5 | DKYGSGSTRAA        | Helix  | Helix  | 1.07 | 0.683 |

|      |                      |        |        |      |       |
|------|----------------------|--------|--------|------|-------|
| 1lu4 | VFYRADGTSTF          | Strand | Strand | 1.08 | 0.7   |
| 1hz6 | NLIFANGSTQT          | Strand | Strand | 0.8  | 0.543 |
| 1jf8 | DNNCPILPPNVKKE       | Helix  | Strand | 1.57 | 1.15  |
| 1pht | SLVALGFSDGQEARPEE    | Helix  | Helix  | 2    | 1.69  |
| 1f8e | LGR TISIASRSGY       | Strand | Strand | 1.7  | 1.33  |
| 1g64 | RAVGHGKNVGV          | Helix  | Strand | 1.09 | 0.705 |
| 1gvp | VEIKPSQAQFTTR        | Strand | Strand | 1.64 | 1.28  |
| 1dci | FFQVKEVDVGLAADVGT LQ | Strand | Helix  | 2.48 | 2.18  |
| 1ix2 | IIPREPLPAGTY         | Strand | Strand | 1.2  | 0.77  |
| 1nls | IDIKSVRSK KTA        | Strand | Strand | 1.67 | 1.12  |
| 1kqp | RELHVKPSIDPKQ        | Helix  | Helix  | 1.47 | 1.17  |
| 1o4y | KAKIMDQVLANA         | Strand | Strand | 1.56 | 1     |
| 1p35 | RSVTRKNNNLRD         | Strand | Helix  | 1.28 | 0.837 |
| 1mml | VPCQSPWNTPLLP        | Strand | Strand | 1.83 | 1.45  |
| 1orn | VAFGVPAIAVDTHV       | Helix  | Helix  | 1.55 | 1.15  |
| 1nkr | YEWSKSSDPLL V        | Strand | Strand | 1.59 | 1.05  |
| 1k7j | VIDLTDDTPVVV         | Strand | Strand | 1.01 | 0.667 |
| 1qw9 | AVNRDMEDALL L        | Strand | Strand | 1.5  | 0.996 |
| 1r26 | VSKCRVLQLPTFI        | Helix  | Strand | 1.68 | 1.33  |
| 1llf | IMQSGAMVPSDPVDGTYG   | Strand | Helix  | 2.28 | 2.11  |
| 1mjh | VKAFKTLKAE EVI       | Helix  | Strand | 1.71 | 1.37  |
| 1lq9 | ALSSLPGLMGPPKAV      | Helix  | Strand | 1.4  | 1.19  |
| 1jg1 | LEVGTGSGWNA          | Strand | Helix  | 1.31 | 0.863 |
| 1tl2 | LIGKGGWSNFKFLF       | Strand | Strand | 1.92 | 1.43  |
| 1hyo | GYHGRASSIVV          | Strand | Strand | 1.68 | 1.09  |
| 1nc5 | INKGYLDRAYETT        | Helix  | Helix  | 1.62 | 1.29  |

|      |                       |        |        |      |       |
|------|-----------------------|--------|--------|------|-------|
| 1oey | SKKLELRLEHTKLSY       | Helix  | Strand | 2.06 | 1.67  |
| 1svp | VTWNSKGKTIK           | Strand | Strand | 1.18 | 0.78  |
| 1a6q | DFKGSAGAPSVEN         | Helix  | Helix  | 1.41 | 1.14  |
| 1l3k | VMRDPNTRSRG           | Strand | Strand | 1.28 | 0.876 |
| 1flm | EFEAIARFKWARAAL       | Helix  | Strand | 1.62 | 1.33  |
| 1gwm | INPQEGKYGAVS          | Strand | Strand | 1.51 | 0.998 |
| 1fj2 | KTYEGMMHSSCQQE        | Strand | Helix  | 1.52 | 1.11  |
| 1mai | LKVKSSSWRRE           | Strand | Strand | 1.79 | 1.14  |
| 1p1m | LQKAQNPRNLDVNT        | Helix  | Helix  | 1.66 | 1.22  |
| 1g8a | ATKNLVPQQRVYGERVIK    | Strand | Strand | 1.99 | 1.82  |
| 1h4a | GDYRRYQDWGATNARVGLSLR | Strand | Strand | 2.8  | 2.58  |
| 1nc5 | KHTKDAKTGLFYHAWD      | Helix  | Strand | 2.21 | 1.89  |
| 1lok | DEYLPSLTYGF           | Helix  | Strand | 1.4  | 0.92  |
| 1elk | RTILPKNNPPTIV         | Helix  | Helix  | 1.33 | 1.07  |
| 1gkl | GIAASRMHRGF           | Helix  | Strand | 1.01 | 0.655 |
| 1i1w | TLVWHSQLPSWV          | Strand | Helix  | 1.33 | 0.897 |
| 1o7j | INAVPEVKKLANVK        | Helix  | Strand | 1.98 | 1.39  |
| 1l2h | LVMSGPYELKA           | Strand | Strand | 1.52 | 1.03  |
| 1qre | IRSDEGMPIFV           | Strand | Strand | 1.52 | 1     |
| 1l7a | SIGLIDKVTPPST         | Strand | Helix  | 1.47 | 1.16  |
| 2rsp | LTNTGSHPVKQRSVY       | Strand | Strand | 1.21 | 1.01  |
| 1ubk | LDYHETIMAAAGDA        | Strand | Helix  | 2.29 | 1.61  |
| 1kxg | VLYTDKTYAMG           | Strand | Strand | 1.26 | 0.82  |
| 1ako | FDDNRGLRIDLL          | Helix  | Strand | 1.61 | 1.07  |
| 1gkl | VNCLDYVAYFM           | Helix  | Strand | 1.41 | 0.945 |
| 1ix2 | LNFSENLTVKFSGAK       | Strand | Strand | 2.5  | 2.03  |

|      |                    |        |        |       |       |
|------|--------------------|--------|--------|-------|-------|
| 1n1f | FKDHQEPNPKI        | Helix  | Helix  | 1.22  | 0.806 |
| 1uhn | EEADTKHDGKIDKEE    | Helix  | Helix  | 1.76  | 1.5   |
| 4eug | DVLAEEKQQPYF       | Helix  | Helix  | 0.906 | 0.601 |
| 1h2w | KLIDNFEGEYDY       | Strand | Strand | 1.72  | 1.14  |
| 1ka1 | GFLRGEQFAVC        | Helix  | Strand | 0.582 | 0.372 |
| 1o9g | IRTADVDFPRALSA     | Strand | Helix  | 1.73  | 1.29  |
| 1hkf | LQSVAGQTLTV        | Strand | Strand | 1.03  | 0.669 |
| 1jr8 | IEKYPVQTSSRTA      | Helix  | Helix  | 1.08  | 0.864 |
| 1mog | GVEIGAVEERTYQ      | Strand | Strand | 1.06  | 0.851 |
| 1hbk | WKSVENLNRED        | Helix  | Helix  | 1.35  | 0.878 |
| 1ny1 | YLLHTVSRDNAE       | Strand | Helix  | 1.37  | 0.893 |
| 1hxn | KELGSPPVISLEAVDAAF | Helix  | Strand | 2.51  | 2.3   |
| 1kte | FVDITATSDTNE       | Strand | Helix  | 0.859 | 0.56  |
| 1i8a | FIDENNHKTGYVEDDDAQ | Strand | Strand | 2.17  | 1.96  |
| 1o1x | SILSNEADFGI        | Helix  | Strand | 0.967 | 0.627 |
| 1mj5 | DFCRTWPNQTE        | Helix  | Strand | 1.16  | 0.787 |
| 1n8k | VEVAPPKAHEVR       | Strand | Strand | 1.29  | 0.865 |
| 1iby | FTIWCQLHPKNIHLPRTL | Strand | Strand | 2.18  | 1.97  |
| 1odz | YLRDVKGVRNFLY      | Helix  | Strand | 1.29  | 0.997 |
| 1kmv | GIGKNGDLPWPPLRNE   | Strand | Helix  | 2.35  | 2     |
| 1ltz | ERLEVADADRVPDFNK   | Helix  | Helix  | 1.9   | 1.54  |
| 1gxr | VTISNPTRHVY        | Strand | Strand | 0.846 | 0.549 |
| 1a8e | SCHTGLGRSAGWNIP    | Strand | Helix  | 1.91  | 1.61  |
| 1pkh | LVCPLNYNLTEEK      | Strand | Helix  | 1.31  | 1.05  |
| 2pth | RIGIGHPGDKNK       | Strand | Helix  | 1.31  | 0.871 |
| 1otg | WQMADGQHDYAF       | Strand | Strand | 1.4   | 0.931 |

|      |                      |        |        |       |       |
|------|----------------------|--------|--------|-------|-------|
| 1j0p | LKMDKTKQPVVVF        | Strand | Strand | 1.03  | 0.704 |
| 1qdd | KDVPCEDKFSF          | Strand | Strand | 1.24  | 0.845 |
| 1uhn | KISSAVIDDGLINKEE     | Helix  | Helix  | 2.02  | 1.72  |
| 1dfm | NIPIPKRFDFLGTDID     | Strand | Strand | 1.6   | 1.34  |
| 1ig3 | VTLGGLGGRFDQ         | Strand | Helix  | 1.85  | 1.26  |
| 1m2d | VWYGQVKPEDVDE        | Strand | Helix  | 1.71  | 1.32  |
| 1svp | DVKNEGDVIG           | Strand | Strand | 0.814 | 0.545 |
| 1e29 | DLAGAEPRRDNVLA       | Helix  | Helix  | 1.63  | 1.16  |
| 1gak | FRDVQGFRRGPKMTAAM    | Helix  | Helix  | 2.08  | 1.69  |
| 1o98 | IGAGRIVYQSLT         | Helix  | Helix  | 1.47  | 1     |
| 1g6l | VEIGTIAELPTVGSNAVV   | Strand | Strand | 2.79  | 2.47  |
| 1k7c | VNSYFPIDHTHTSPAG     | Helix  | Helix  | 1.84  | 1.53  |
| 1o4y | WYNGGTPWRSAYHRY      | Strand | Strand | 2.13  | 1.75  |
| 1qwn | KKAELYRTNVLL         | Helix  | Strand | 1.41  | 0.905 |
| 1llf | FLSKQLSGLPIMGTFHANDI | Strand | Helix  | 2.33  | 2.17  |
| 1kqr | IANASQTQWKF          | Strand | Strand | 1.11  | 0.732 |
| 1qto | AVRDPAGNCVH          | Strand | Strand | 0.685 | 0.458 |
| 1lk9 | EVVGNAAAKDRYIV       | Helix  | Strand | 1.63  | 1.16  |
| 1t1d | FYQSGGRLRRPVNVPLDV   | Helix  | Helix  | 2.63  | 2.33  |
| 1bdy | KEALTTRGKTLVQ        | Strand | Strand | 1.88  | 1.36  |
| 1lqt | VRSGVAPDHPKIKSISKQ   | Helix  | Helix  | 2.23  | 2.07  |
| 1ooh | IRSGCAPKFKLKTED      | Helix  | Helix  | 1.56  | 1.27  |
| 1muw | HEQMAGLNFPH          | Helix  | Helix  | 0.738 | 0.472 |
| 1knm | LDAVGNGTANGTLIQL     | Strand | Strand | 2.38  | 1.98  |
| 1kw4 | FIRELPGCQDYVDD       | Helix  | Helix  | 1.94  | 1.38  |
| 1es5 | KTVTKTGSIRT          | Strand | Strand | 0.484 | 0.324 |

|      |                      |        |        |       |       |
|------|----------------------|--------|--------|-------|-------|
| 1byi | VASGSEKTPEGLRNSDA    | Strand | Helix  | 2.46  | 2.02  |
| 1i8n | KRPGWKLPDNLTK        | Strand | Strand | 1.93  | 1.4   |
| 1p1m | FGPHSPYLCSEEY        | Strand | Helix  | 1.7   | 1.34  |
| 1c75 | ILNGQGGMPGGIAKGAE    | Helix  | Helix  | 2.2   | 1.85  |
| 1jl7 | GVRHKGYGNKHIKAEYFEP  | Helix  | Helix  | 2.21  | 1.94  |
| 1ld8 | ISNTTGYNDRAV         | Helix  | Helix  | 1.18  | 0.768 |
| 1muw | RHFDFKPPRTEDIDG      | Strand | Helix  | 1.87  | 1.52  |
| 1qj4 | YVWTDQDEIFLPEF       | Strand | Helix  | 2.05  | 1.46  |
| 1mxi | RLRRSGLDYHEFAEIKRH   | Helix  | Strand | 1.87  | 1.68  |
| 1e7l | YLKSDYTQNNIHPNFV     | Helix  | Helix  | 2.25  | 1.83  |
| 1dj0 | VFCAGRTDAGVHGT       | Strand | Strand | 1.64  | 1.15  |
| 1ufy | EANGIQSYEELAA        | Helix  | Strand | 1.56  | 1.2   |
| 1n7o | AYYNPETQESAPDQE      | Strand | Helix  | 2.17  | 1.81  |
| 1onw | LENCDVPISKLLP        | Helix  | Strand | 1.57  | 1.15  |
| 1jf8 | MKEVDIDISNHTSDLIDNDI | Helix  | Helix  | 2.28  | 2.2   |
| 1nnf | AVENGEVPAAL          | Helix  | Strand | 0.929 | 0.63  |
| 1ctj | ACHAGGGNNVIPDHTLQKAA | Helix  | Helix  | 3.18  | 3.06  |
| 1pz4 | LVESDDAAEATL         | Strand | Strand | 2.05  | 1.31  |
| 1m4j | RARNGKYRLK           | Helix  | Strand | 0.777 | 0.496 |
| 1qwn | AERAGQAEFPTLS        | Helix  | Strand | 1.19  | 0.927 |
| 1of4 | VKLPGKSDWEEV         | Strand | Strand | 1.02  | 0.685 |
| 1uhn | QLALFKTNKKESLF       | Helix  | Helix  | 1.05  | 0.768 |
| 1mj5 | AYREPFLAAGEARRPT     | Helix  | Helix  | 1.72  | 1.42  |
| 1oru | LDFDYGGIPGDLHFGLTKK  | Strand | Strand | 2.69  | 2.33  |
| 1oe1 | WVWETGKFANPPQRD      | Strand | Strand | 1.85  | 1.58  |
| 1llf | IFGLSSLNVTTNAQ       | Helix  | Helix  | 1.83  | 1.3   |



|      |                     |        |        |       |       |
|------|---------------------|--------|--------|-------|-------|
| 1n7o | YLYNGDLSHYSDGYWP    | Strand | Helix  | 2.26  | 1.85  |
| 1k3x | VVDTGEEPQTTRVLRV    | Strand | Strand | 2.25  | 1.87  |
| 1dqz | MNDSGGYNANS         | Helix  | Helix  | 1.2   | 0.814 |
| 1dk8 | IMKQLIDPAMFDQA      | Helix  | Helix  | 1.71  | 1.24  |
| 1xer | WYDTPGHPASEKKA      | Strand | Strand | 1.42  | 1.01  |
| 1hyo | SLKGEGMSQAATI       | Strand | Strand | 1.48  | 1.18  |
| 1c7g | RLTIPRRVYTYAH       | Strand | Helix  | 1.87  | 1.44  |
| 1rss | NKIMRDGKKNL         | Helix  | Helix  | 1.16  | 0.774 |
| 1n1p | AITKNPQRGTFVY       | Strand | Strand | 1.1   | 0.851 |
| 1ogw | DKEGIPPDQQRL        | Helix  | Strand | 1.33  | 0.905 |
| 1llf | QAVLPQSEDCLTIN      | Helix  | Strand | 1.5   | 1.1   |
| 1f0  | EVDVGEIAPRTV        | Strand | Strand | 1.18  | 0.757 |
| 1lpl | YVGATKFKEGVWVG      | Strand | Strand | 1.64  | 1.22  |
| 1ga6 | QSANSNSLGFPAAS      | Helix  | Helix  | 1.95  | 1.37  |
| 1b4u | AGSMTGMTQEE         | Helix  | Helix  | 1.01  | 0.652 |
| 1cl2 | FVLKKKLNNEE         | Strand | Helix  | 1.06  | 0.679 |
| 1cv8 | VIPVSNGDHYQ         | Strand | Strand | 0.918 | 0.604 |
| 1fkm | EIDIPRTNPHIPLYQFKSV | Helix  | Helix  | 2.43  | 2.18  |
| 3cla | QVHHAVCDGFH         | Strand | Helix  | 1.42  | 0.952 |
| 1eaz | GYFKSELEKEPLRVI     | Strand | Strand | 1.27  | 1.08  |
| 1mml | GNLGYRASAKKAQIC     | Helix  | Strand | 2.09  | 1.78  |
| 1eb6 | YSELPPLAQKCHAQDQAT  | Helix  | Helix  | 2.14  | 1.94  |
| 1bx4 | SQLVSDKPLTE         | Helix  | Helix  | 0.748 | 0.493 |
| 1k3x | LQRVGPVLDPNLTPEV    | Helix  | Helix  | 2.75  | 2.23  |
| 1koi | VLNRNKDAAAGDKV      | Strand | Helix  | 1.69  | 1.2   |
| 1bqc | IHMYGVYSQAST        | Strand | Helix  | 1.27  | 0.857 |

|       |                      |        |        |       |       |
|-------|----------------------|--------|--------|-------|-------|
| 1alu  | QKKAKNLDAITTPDPTT    | Helix  | Helix  | 2.56  | 2.18  |
| 1pzw  | CLQIFDVDSGESKVAE     | Strand | Helix  | 2.27  | 1.85  |
| 1nof  | KSQGSKFGSLKVI        | Helix  | Strand | 1.98  | 1.59  |
| 1hxx  | MFVRHDVSSEAD         | Strand | Helix  | 1.37  | 0.937 |
| 1l7a  | VADYPYLSNFER         | Strand | Helix  | 1.46  | 0.969 |
| 1i07  | KVRNASGDSGF          | Strand | Strand | 0.826 | 0.552 |
| 1ayl  | TLSTDPKRRLI          | Helix  | Strand | 1.38  | 0.881 |
| 1gvp  | KITLDEGQPAYAPGLY     | Strand | Strand | 1.97  | 1.66  |
| 1lkf  | DYAPKNQNEEFQVQ       | Strand | Strand | 1.91  | 1.4   |
| 1hzi  | GLAGLNSCPVKEANQST    | Helix  | Strand | 2.21  | 1.79  |
| 1jnr  | YWAKLGGLKVTL         | Helix  | Strand | 1.28  | 0.847 |
| 1j83  | TIATDAADSVVT         | Helix  | Strand | 0.977 | 0.666 |
| 1dzk  | IGSSDLEKIGENAPFQVFMR | Strand | Strand | 2.65  | 2.47  |
| 1khy  | ALLNQEGGSVSP         | Helix  | Helix  | 0.947 | 0.637 |
| 1llf  | LNHFQGGTKYS          | Helix  | Strand | 1.4   | 0.893 |
| 1pzt  | INQAGESMFNRAK        | Strand | Helix  | 1.17  | 0.921 |
| 1ctj  | EQFLDGGFNIEA         | Helix  | Helix  | 0.996 | 0.65  |
| 1lipi | FVFTPSSGVSLEV        | Strand | Helix  | 1.79  | 1.41  |
| 1iua  | AIALKYNQDATKSERVA    | Helix  | Helix  | 2.08  | 1.71  |
| 1e6b  | KKINPMGTVPALV        | Helix  | Strand | 1.31  | 1.04  |
| 1ayl  | AFCGANPDTRLSV        | Strand | Strand | 1.24  | 0.989 |
| 1oyz  | QITAFDKSTNV          | Helix  | Helix  | 1.1   | 0.736 |
| 1fye  | VTGIHRVADPLA         | Strand | Helix  | 0.84  | 0.548 |
| 1gqo  | VLNPGALSHYSYAI       | Strand | Helix  | 1.61  | 1.17  |
| 1aba  | QVFAPDGSHIG          | Strand | Strand | 0.856 | 0.572 |
| 1d4o  | DEINHDFPDSDLVL       | Helix  | Strand | 1.67  | 1.19  |

|      |                       |        |        |       |       |
|------|-----------------------|--------|--------|-------|-------|
| 1hkf | VTMTDLREEDSGHY        | Strand | Strand | 2.13  | 1.54  |
| 1aoc | RVIVQAPRAGFRQCVWQHK   | Strand | Strand | 2.95  | 2.59  |
| 1mpl | LVDEGKLDLDASVNT       | Helix  | Helix  | 1.96  | 1.61  |
| 1ecd | ASHKPRGVTHDQ          | Helix  | Helix  | 0.901 | 0.615 |
| 1fit | LPRKAGDASWRSEEE       | Strand | Helix  | 3.86  | 3.29  |
| 1p4o | RMCWQYNPKMRPSFLE      | Helix  | Helix  | 1.69  | 1.43  |
| 1es9 | NFGIGGDSTQH           | Strand | Helix  | 1.08  | 0.722 |
| 1iof | VGLAPGRSAISI          | Strand | Strand | 1.6   | 1.03  |
| 7a3h | DWHILSDNDPNYKKEE      | Strand | Helix  | 1.89  | 1.54  |
| 1hh8 | LIDYKILGLQFKLF        | Strand | Strand | 1.46  | 1.07  |
| 1br9 | SGNDIYGNIPIK          | Strand | Strand | 0.819 | 0.548 |
| 1lj9 | NIEFKELSLTRGQYL       | Helix  | Helix  | 1.34  | 1.13  |
| 1n1p | SMLRVNHIDTKW          | Helix  | Helix  | 1.82  | 1.24  |
| 1nxb | ICFNQHSSQPQTTKT       | Strand | Strand | 1.88  | 1.57  |
| 1m15 | GVENLD SGVGIYAPDAESYR | Helix  | Helix  | 3.14  | 2.96  |
| 1hx0 | FRIDASKHMWPGD         | Strand | Helix  | 2.15  | 1.7   |
| 1ozn | TLYLFANNLSALPTEA      | Strand | Helix  | 2.39  | 1.99  |
| 1gyc | QILSGAQTAQDLLPAGSVYP  | Helix  | Strand | 2.33  | 2.25  |
| 1lxj | VPIGTDSASISDF         | Strand | Helix  | 1.59  | 1.29  |
| 1hx0 | CERYLGPKGFGGVQ        | Helix  | Strand | 2.03  | 1.51  |
| 1dfm | VKASDQASKVGLIF        | Strand | Strand | 1.9   | 1.57  |
| 1h2w | WHKGGILANKQNC         | Helix  | Helix  | 1.65  | 1.29  |
| 1nnf | KEKGVENLKSRL          | Helix  | Strand | 1.43  | 0.918 |
| 1lk9 | ALLDQSDRFSY           | Helix  | Strand | 0.922 | 0.598 |
| 1gkl | VYLPYGYDPNKKYNIF      | Strand | Strand | 1.89  | 1.54  |
| 1bys | ETGSFNFTKAA           | Strand | Helix  | 1.14  | 0.75  |

|      |                    |        |        |       |       |
|------|--------------------|--------|--------|-------|-------|
| 2spc | DDANAGGNVEA        | Helix  | Helix  | 1.64  | 1.06  |
| 1lok | ALQLDMTNYKGSAQDVVF | Strand | Strand | 2.17  | 2.01  |
| 1am2 | KVLDRHGPNPVL       | Strand | Strand | 0.949 | 0.634 |
| 1k3i | TVFASNGLYFARTFHTSV | Strand | Strand | 2.6   | 2.38  |
| 1p4o | IATLAEQPYQGLSNEQ   | Helix  | Helix  | 2.24  | 1.87  |
| 1qw9 | TMIEKDFKIA         | Strand | Strand | 1.46  | 0.96  |
| 1ji3 | TYRGALTGNHYP       | Strand | Strand | 1.51  | 1.02  |
| 1dl2 | TSHNMPRGNQPLGWIIVD | Strand | Helix  | 2.73  | 2.5   |
| 1qqf | LLLLKDFDSVPP       | Helix  | Helix  | 1.2   | 0.783 |
| 1hd2 | EVFEGEPGNKVN       | Strand | Strand | 1.08  | 0.738 |
| 1dqg | CLGVPSKTDWASVTLY   | Strand | Strand | 1.88  | 1.6   |
| 1jks | LKEIQHPNVITLHE     | Helix  | Strand | 1.35  | 1     |
| 1gd0 | MAFGGSSEPCALC      | Strand | Strand | 0.813 | 0.659 |
| 1kqp | DYLEGKEVSAKV       | Helix  | Helix  | 0.527 | 0.354 |
| 1mj5 | AEPGALTTGRM        | Strand | Helix  | 1.49  | 0.95  |
| 1l8j | WQADTQVTSGVV       | Strand | Helix  | 1.07  | 0.707 |
| 1l3l | HASDFGIRSGI        | Helix  | Strand | 0.793 | 0.53  |
| 1hx0 | LLDLALEKDYV        | Strand | Helix  | 0.724 | 0.484 |
| 1dos | ELSKISPRFTI        | Helix  | Strand | 1.29  | 0.838 |
| 1k3i | WYYTSGSGDVK        | Strand | Strand | 1.35  | 0.919 |
| 1gkl | NRSGLSKREYFVF      | Helix  | Strand | 1.16  | 0.941 |
| 1ayl | VAVDTGIFTGRSPKDKYI | Strand | Strand | 2.82  | 2.58  |
| 1p1m | LVHAFSGEVFATM      | Helix  | Strand | 1.73  | 1.4   |
| 1f0i | NKLDGSAADPSDWLLQ   | Strand | Strand | 2.03  | 1.71  |
| 1nkr | CSSRSSYDMYH        | Strand | Strand | 0.95  | 0.626 |
| 1e1a | YCFTTDGQMIQ        | Strand | Strand | 0.715 | 0.478 |

|      |                       |        |        |       |       |
|------|-----------------------|--------|--------|-------|-------|
| 1iv3 | TFKTSEGLAPSHVQ        | Strand | Strand | 1.74  | 1.26  |
| 1m1n | IELTPKVKLNL           | Helix  | Strand | 0.883 | 0.573 |
| 1mk4 | FEHFQDTSFIT           | Helix  | Strand | 0.979 | 0.635 |
| 1qwn | TIMRGGAPEIR           | Strand | Strand | 0.525 | 0.356 |
| 1oaa | VNISSLCALQPYKGWGLY    | Strand | Helix  | 2.62  | 2.4   |
| 1a8e | GLLYCDLPEPRKPLEK      | Helix  | Helix  | 1.49  | 1.24  |
| 1hxx | LVNNA GILLPGDMETGRLED | Strand | Helix  | 2.81  | 2.64  |
| 1ig3 | IEEKELQVDVIV          | Helix  | Strand | 1.18  | 0.755 |
| 1gxm | YTYDSSLAATNP IVP      | Strand | Strand | 1.76  | 1.43  |
| 1nnf | AAVLKASKNQAE          | Strand | Helix  | 1.36  | 0.931 |
| 1ogo | TINAPPFNTMDF          | Strand | Strand | 1.52  | 1.04  |
| 1hdo | VVVG DVLQAAD          | Strand | Helix  | 1.5   | 0.96  |
| 1jfb | CRYHTASALAIKRT        | Helix  | Strand | 1.48  | 1.07  |
| 1ocy | MMWAADSLPSDAWRF       | Strand | Strand | 1.66  | 1.36  |
| 1l3k | FIGGLSFETTDES         | Strand | Helix  | 1.4   | 1.08  |
| 1qs1 | DKMFDKTNLSNSIIT       | Helix  | Strand | 1.54  | 1.25  |
| 1reg | LRMDGRQVEMTEED        | Helix  | Helix  | 1.36  | 0.972 |
| 1lb6 | FMHLEALRQRTFIKDDTLLV  | Strand | Strand | 1.92  | 1.79  |
| 2nlr | TQADGSAPTNGAPKSYPSVF  | Strand | Strand | 2.72  | 2.59  |
| 1oqw | LTRTAADGLWKC          | Strand | Strand | 1.29  | 0.868 |
| 1orn | KRLGFCRWDDSVLE        | Helix  | Helix  | 1.61  | 1.13  |
| 1moq | AICNVP GSSLV          | Strand | Helix  | 0.767 | 0.513 |
| 1km6 | FLLTEMSHPGAEMFIQG     | Strand | Helix  | 2.16  | 1.84  |
| 1idp | QRYKDTTMKEVTM         | Strand | Strand | 1.58  | 1.22  |
| 1e1a | MDFDEDNLLV            | Strand | Strand | 0.691 | 0.441 |
| 1qwn | HSHNDPGWIQT FEE       | Strand | Helix  | 1.2   | 0.877 |

|      |                      |        |        |       |       |
|------|----------------------|--------|--------|-------|-------|
| 1n1d | TYGTFDLLHWGH         | Strand | Helix  | 0.982 | 0.651 |
| 1eu8 | YVYSNGGSLGEF         | Helix  | Strand | 1.44  | 0.954 |
| 1qj4 | MEVFPDWKDTTYF        | Helix  | Strand | 1.47  | 1.19  |
| 1p4c | YLEGGAEDEYGV         | Helix  | Helix  | 1.75  | 1.12  |
| 1otg | LKIGAGRSLES          | Strand | Helix  | 1.27  | 0.837 |
| 3vub | WRMMTTDMASV          | Strand | Strand | 1.33  | 0.89  |
| 1oe1 | VYHCAPEGMVPW         | Strand | Helix  | 1.24  | 0.806 |
| 1jyk | SLYLVKEELANSYV       | Helix  | Strand | 1.52  | 1.09  |
| 1jub | IGTGGIETGQD          | Strand | Helix  | 1.46  | 0.963 |
| 1lqp | YFLDPDGHRLE          | Strand | Strand | 0.664 | 0.431 |
| 1n3l | WGTATTGKPHVAYFVP     | Strand | Helix  | 2.1   | 1.74  |
| 1m4j | IAWSPDHSVRQ          | Strand | Helix  | 1.26  | 0.858 |
| 1pq7 | VSWGNGCARPNYSGVY     | Strand | Strand | 1.83  | 1.49  |
| 1omr | SKFFPEADPKAY         | Helix  | Helix  | 0.751 | 0.505 |
| 1mvl | IAGGLCDNLLT          | Helix  | Helix  | 1.3   | 0.855 |
| 2arc | LLFPPGEIHHY          | Strand | Strand | 0.966 | 0.617 |
| 1n55 | FLVGGASLKPEFRD       | Strand | Helix  | 1.71  | 1.22  |
| 1vcc | VGSDSKGRRQY          | Strand | Strand | 1.13  | 0.735 |
| 1l3k | SHFEQWGTLTD          | Helix  | Strand | 1.19  | 0.804 |
| 1ls1 | VLTCLDGDARGGAA       | Strand | Helix  | 1.74  | 1.26  |
| 1oux | VFTLPANTRFG          | Strand | Strand | 1.22  | 0.794 |
| 1dp7 | RRLGTRGNSKYH         | Strand | Strand | 1.74  | 1.14  |
| 1o7q | IMVDDVSRMPLIELGPLRSF | Strand | Strand | 3.19  | 3.04  |
| 1hx0 | VRDCQLVGLLD          | Helix  | Strand | 1.51  | 1.03  |
| 1uol | QLWVDSTPPPGTRVR      | Strand | Strand | 1.39  | 1.13  |
| 1gwe | LWVNAQGEKHW          | Strand | Strand | 0.6   | 0.389 |

|      |             |        |        |      |       |
|------|-------------|--------|--------|------|-------|
| 1nwz | MKKALSGDSYW | Strand | Strand | 1.31 | 0.86  |
| 1m40 | SGAGERGSRGI | Strand | Strand | 1.21 | 0.787 |

Table II: Comparison of average RMSD of CASP loop structures

| Loop Length | Number of Loops | Lowest RMSD | Lowest RMSD (Zhang-Server) |
|-------------|-----------------|-------------|----------------------------|
| 5           | 25              | 1.04        | 0.98                       |
| 6           | 21              | 1.28        | 1.19                       |
| 7           | 18              | 1.48        | 1.26                       |
| 8           | 12              | 1.61        | 1.44                       |
| 9           | 15              | 1.84        | 1.59                       |
| 10          | 13              | 1.92        | 1.67                       |
| 11          | 11              | 2.08        | 1.75                       |
| 12          | 13              | 2.10        | 1.98                       |
| 13          | 3               | 2.03        | 2.01                       |
| 14          | 2               | 2.42        | 2.19                       |
